# Supplementary material for: Control of selectivity in the preparation of 2-substituted benzoazoles by adjusting the surface hydrophobicity in two solid-based sulfonic acid catalysts
Source: Royal Society of Chemistry journal article supplement (doi:10.1039/d2ob02274e), 2023-01-01
Supplement: d2ob02274e1.pdf [file d2ob02274e1.pdf]

## Electronic Supplementary Information

### Control of Selectivity in the Preparation of 2-Substituted Benzoazoles by Adjusting the Surface Hydrophobicity in Two Solid-Based Sulfonic Acid Catalyst

Babak Karimi,<sup>\*a</sup> Akbar Mobaraki,<sup>\*a,b</sup> Hamid M. Mirzaei<sup>a</sup> and Hojatollah Vali<sup>c</sup>

<sup>a.</sup> *Department of Chemistry, Institute for Advanced Studies in Basic Sciences (IASBS), Zanjan 45137-6731*

*(Iran), Fax: (+98) 241-415-3232*

<sup>b.</sup> *Department of Chemistry, Kharazmi University, South Mofatteh Ave., Tehran 15719-14911 (Iran)*

<sup>c.</sup> *Anatomy and Cell Biology and Facility for Electron Microscopy Research, McGill University, 3450 University St, Montreal, Quebec, H3A 2A7 (Canada)*

#### Table of Contents

|                                                                                              | Page      |
|----------------------------------------------------------------------------------------------|-----------|
| <b>1. Experimental Procedure</b>                                                             | <b>3</b>  |
| 1.1. Preparation of SBA-15-PrSO <sub>3</sub> H and its Characterizations                     | <b>3</b>  |
| 1.2. Preparation of Et-PMO-Me-PrSO <sub>3</sub> H and its Characterizations                  | <b>12</b> |
| 1.3. General procedure for the one-pot preparation of 2-aminobenzothiazoles                  | <b>23</b> |
| 1.4. General procedure for the one-pot preparation of 2-substituted benzoxazole derivatives  | <b>23</b> |
| <b>2. Spectral data for the Tables 3 and 5</b>                                               | <b>24</b> |
| <b>3. Copy of <sup>1</sup>H, <sup>13</sup>C-NMR and IR spectra of Benzoazole derivatives</b> | <b>32</b> |

## 1. Experimental Procedure:

### 1.1. Preparation of SBA-15-PrSO<sub>3</sub>H (1b) and its characterizations

The synthesis of SBA-15-PrSH was achieved using the procedure described by Stucky and co-workers.<sup>10h</sup> This procedure involved a synthetic strategy based on the co-condensation of tetraethoxysilane (TEOS) and 3-mercaptopropyltrimethoxysilane (MPTMS) in the presence of Pluronic P123 as the structure directing agent. In a typical preparation procedure, 4.0 g of Pluronic P123 (Aldrich, average Mw  $\frac{1}{4}$  5800) was dissolved in 125 g of 1.9 M HCl solution with stirring at room temperature. The solution was heated to 40 °C before adding 6.83 g TEOS. After 3 h pre-hydrolysis of TEOS, 1.6 g thiol precursor MPTMS was added. The resultant solution was stirred for 20 h at 40 °C, after which the mixture was aged at 100 °C for 24 h under static conditions. The solid was recovered by filtration and air dried at room temperature overnight. The template was removed from the as-synthesized material by washing with ethanol using a Soxhlet apparatus for 24 h. Conversion of thiol group of the catalyst to sulfonic acid moieties was accomplished using hydrogen peroxide. Typically, 0.3 g of solid material was suspended in 10 g of aqueous 30 wt% H<sub>2</sub>O<sub>2</sub>. This suspension was stirred at room temperature in an Ar atmosphere for 24 h. After the oxidation treatment, the resulting solution was filtered and washed separately with water and ethanol. Finally the wet material was suspended in 1M H<sub>2</sub>SO<sub>4</sub> solution for 2 h, washed several times with water and ethanol, and dried at 60 °C under vacuum overnight to give the corresponding SBA-15-PrSO<sub>3</sub>H.

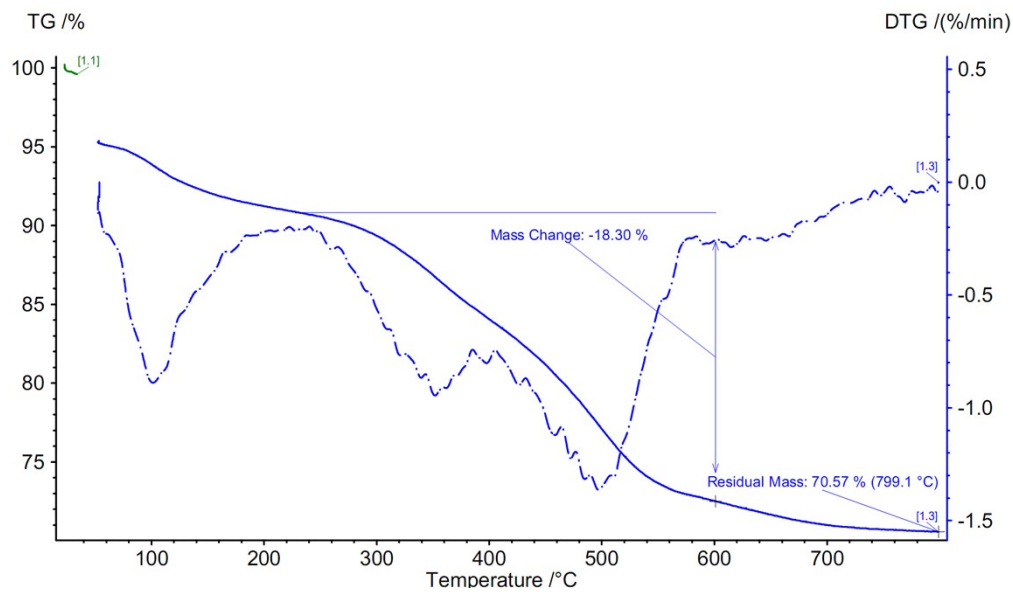

**Figure S1.** TGA and DTG diagram for SBA-15-PrSO<sub>3</sub>H

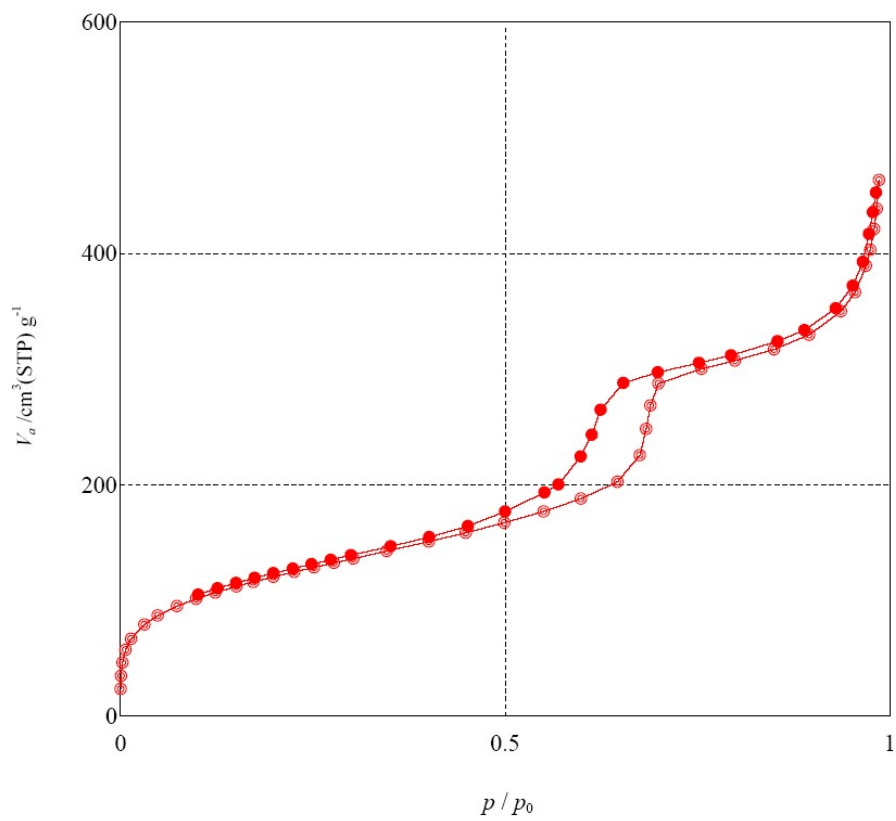

**Figure S2.** Nitrogen adsorption-desorption isotherm for SBA-15-PrSO<sub>3</sub>H

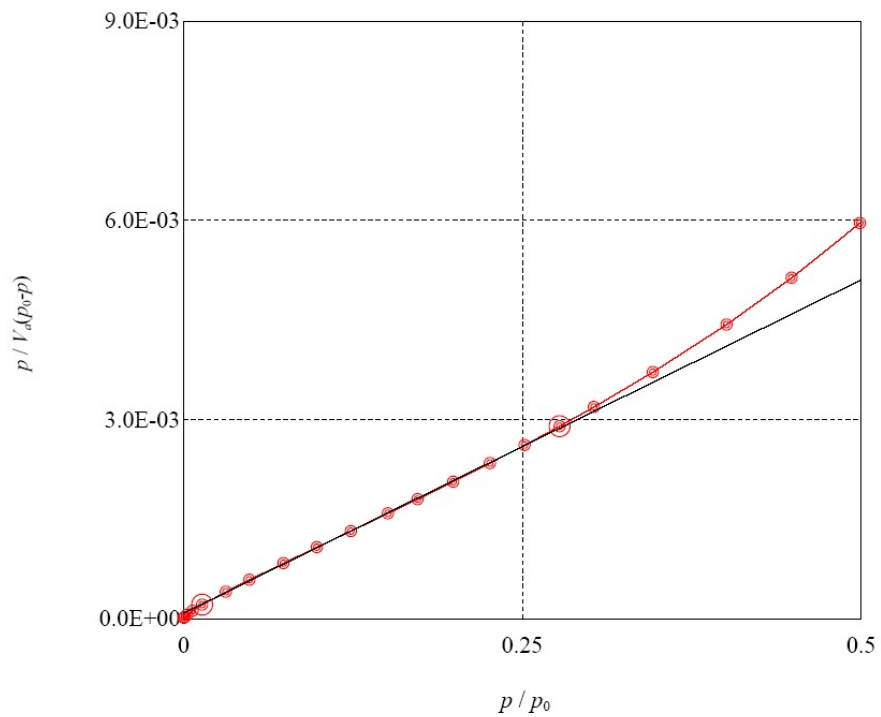

**Figure S3.** BET diagram for SBA-15-PrSO<sub>3</sub>H

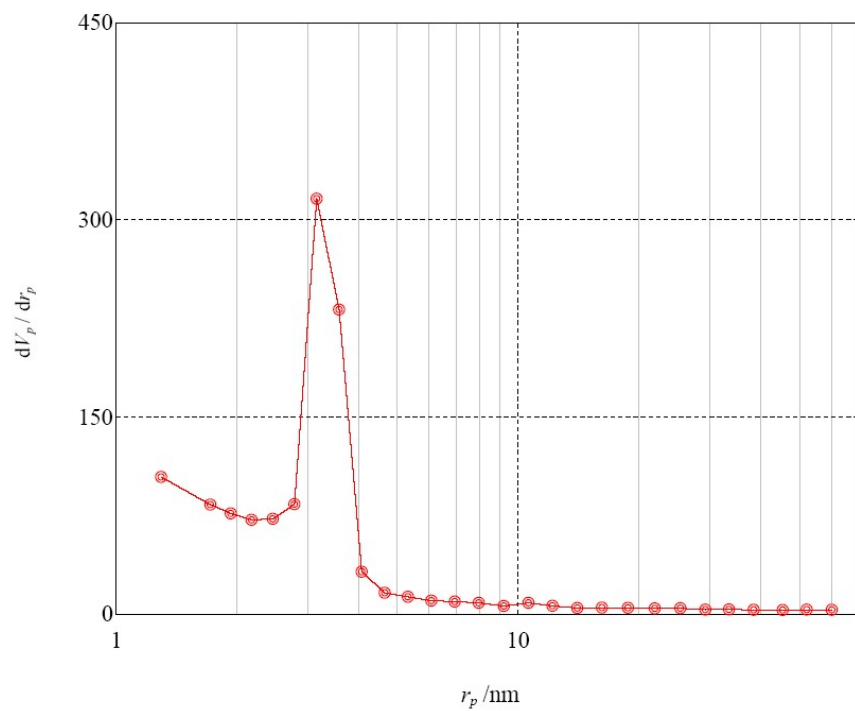

**Figure S4.** BJH average pore diameter diagram for SBA-15-PrSO<sub>3</sub>H

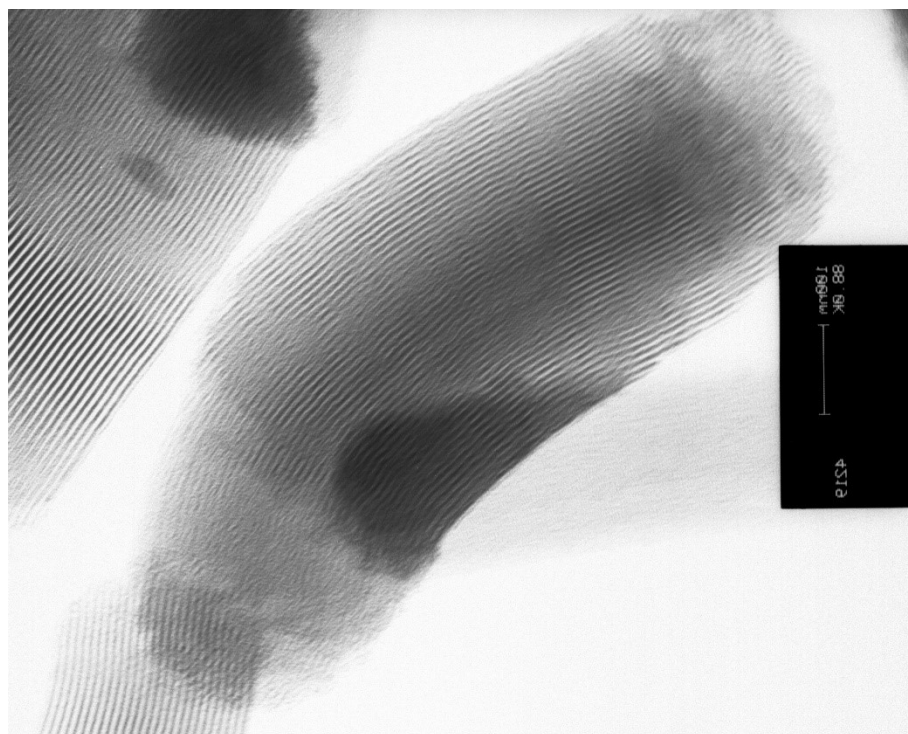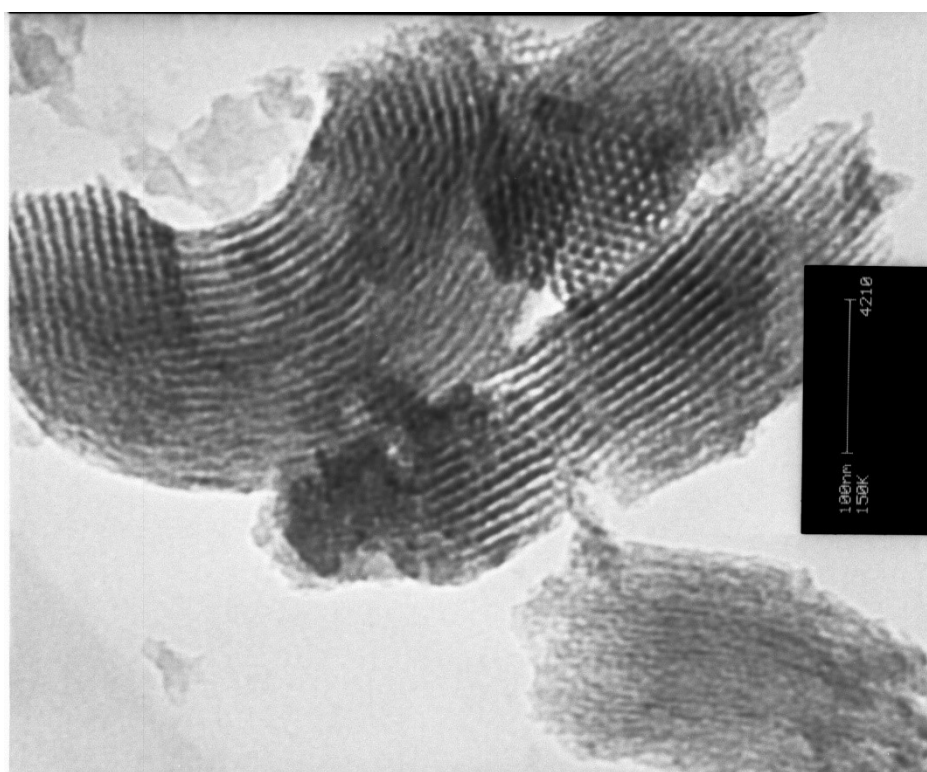

**Figure S5.** TEM images of SBA-15-PrSO<sub>3</sub>H

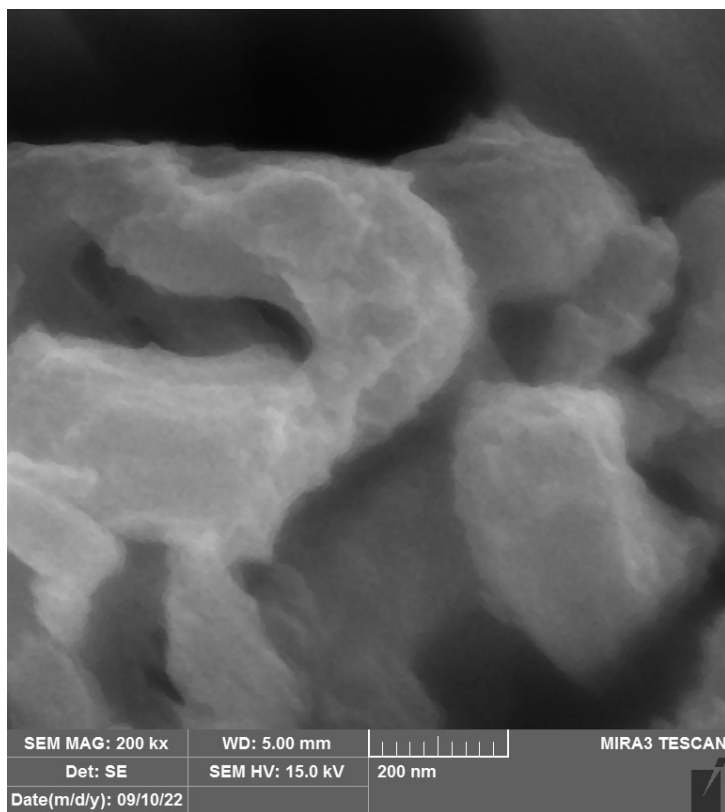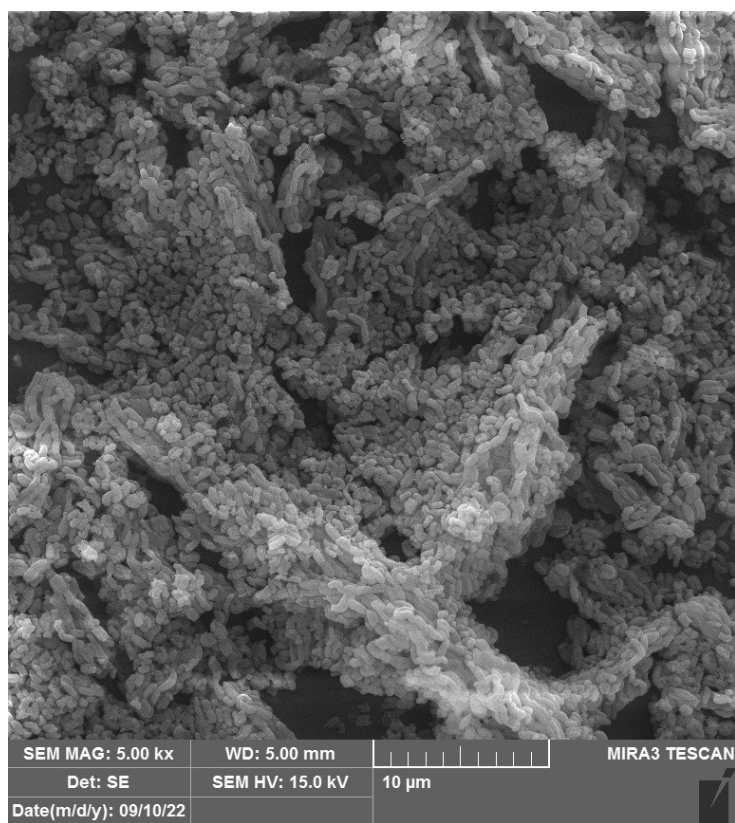

**Figure S6.** SEM images of SBA-15-PrSO<sub>3</sub>H

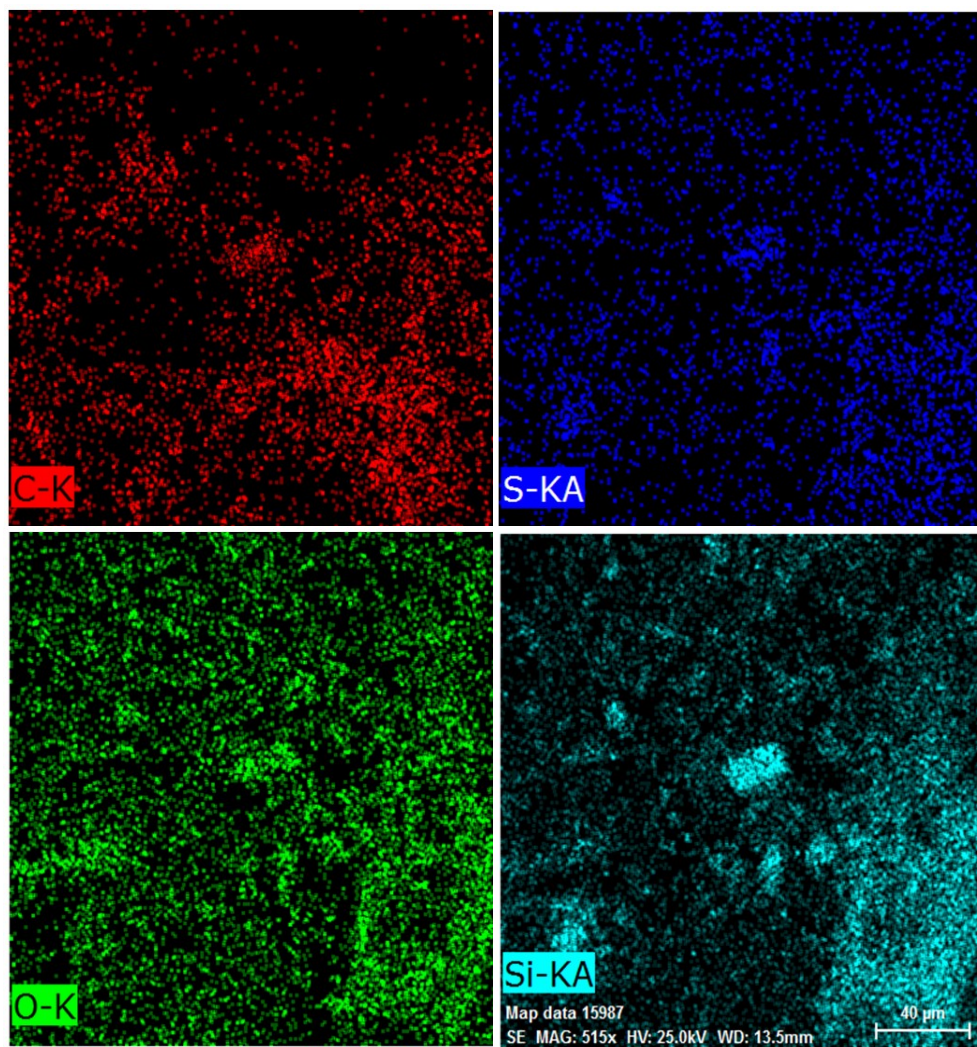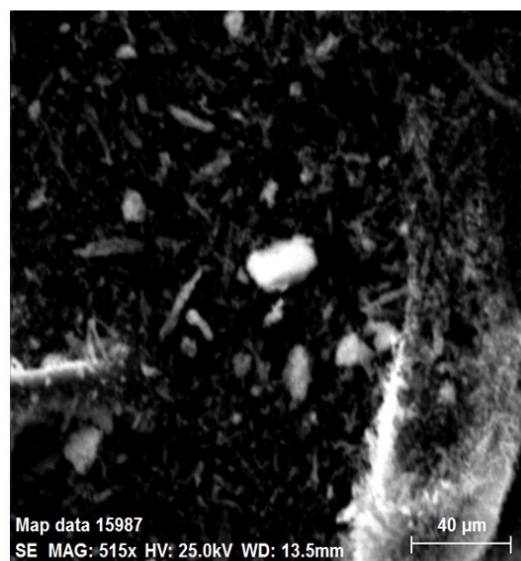

Figure S7. EDX mapping images of SBA-15-PrSO<sub>3</sub>H

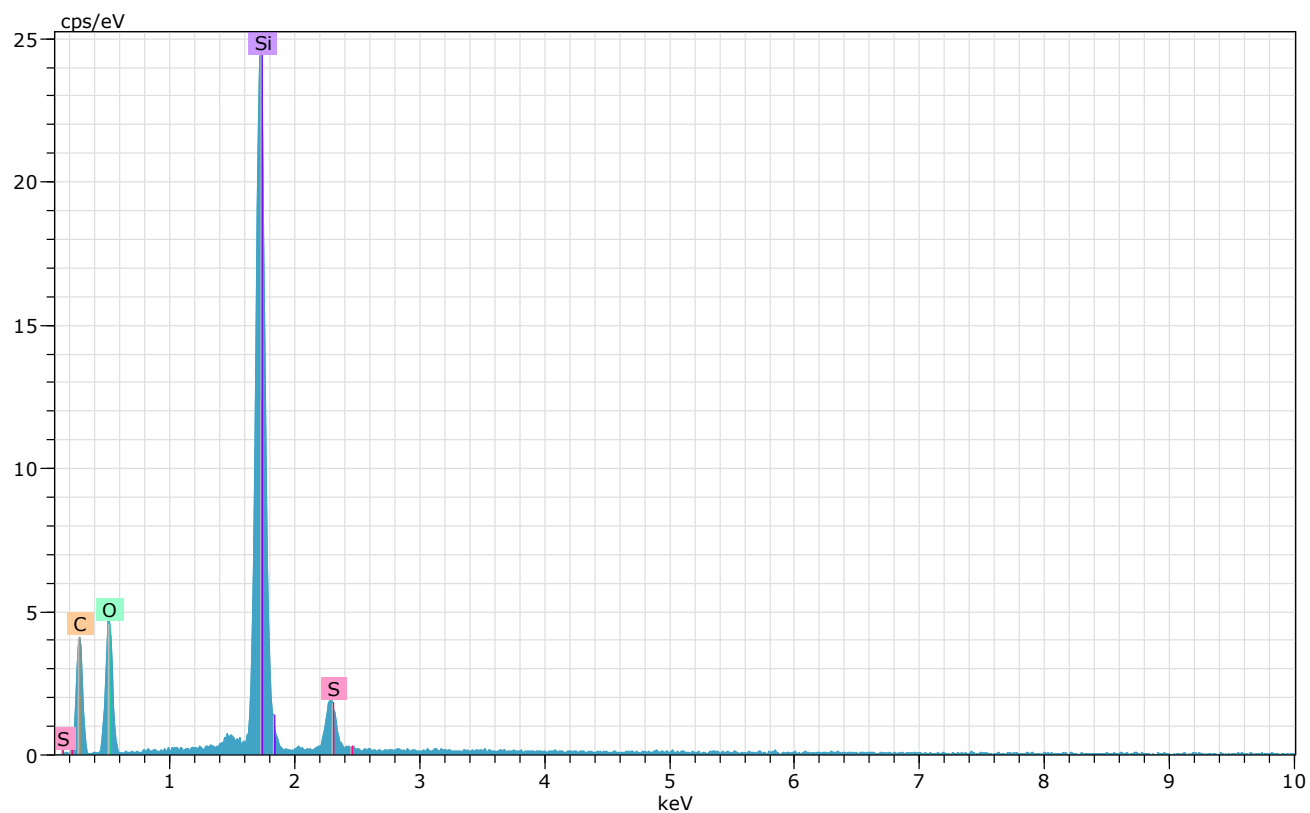

SBA-15-PrSO<sub>3</sub>H  
Objects 614

HV:25.0kV Puls th.:4.83kcps

| El     | AN | Series   | unn. C [wt.%] | norm. C [wt.%] | Atom. C [at.%] | Error (1 Sigma) [wt.%] |
|--------|----|----------|---------------|----------------|----------------|------------------------|
| C      | 6  | K-series | 46.73         | 44.22          | 55.89          | 8.40                   |
| O      | 8  | K-series | 36.59         | 34.62          | 32.85          | 6.25                   |
| Si     | 14 | K-series | 19.77         | 18.71          | 10.11          | 0.91                   |
| S      | 16 | K-series | 2.58          | 2.44           | 1.16           | 0.15                   |
| Total: |    |          | 105.67        | 100.00         | 100.00         |                        |

**Figure S8.** EDS spectrum of the SBA-15-PrSO<sub>3</sub>H



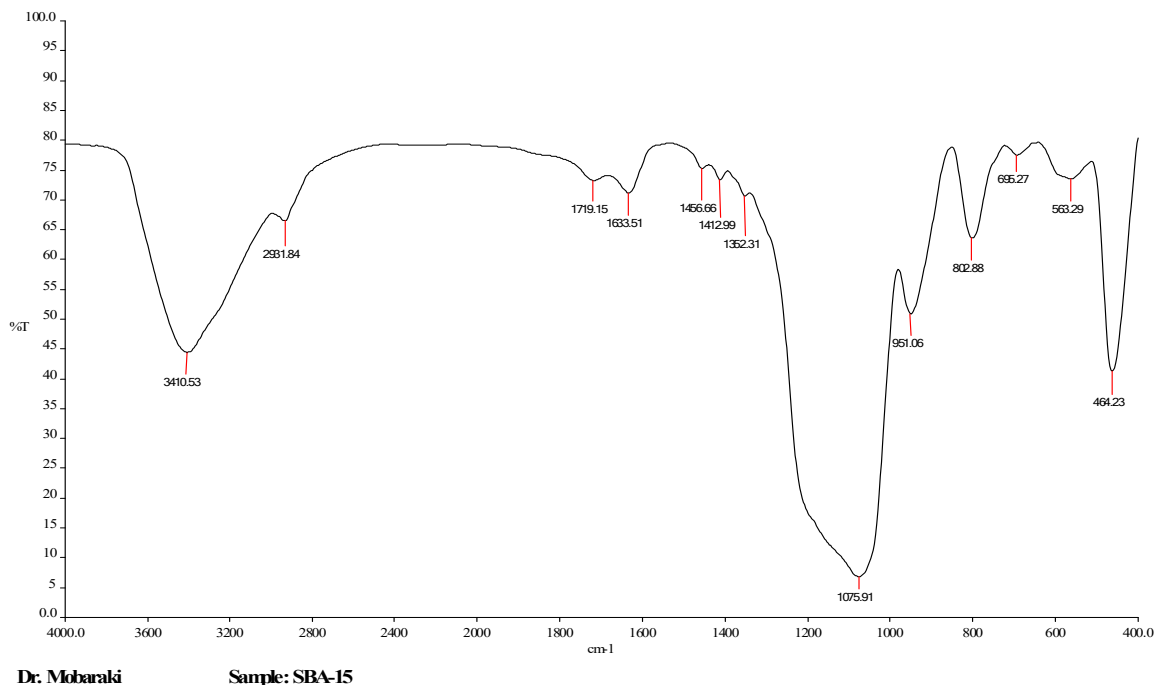

Figure S9. FT-IR spectrum of the SBA-15-PrSO<sub>3</sub>H

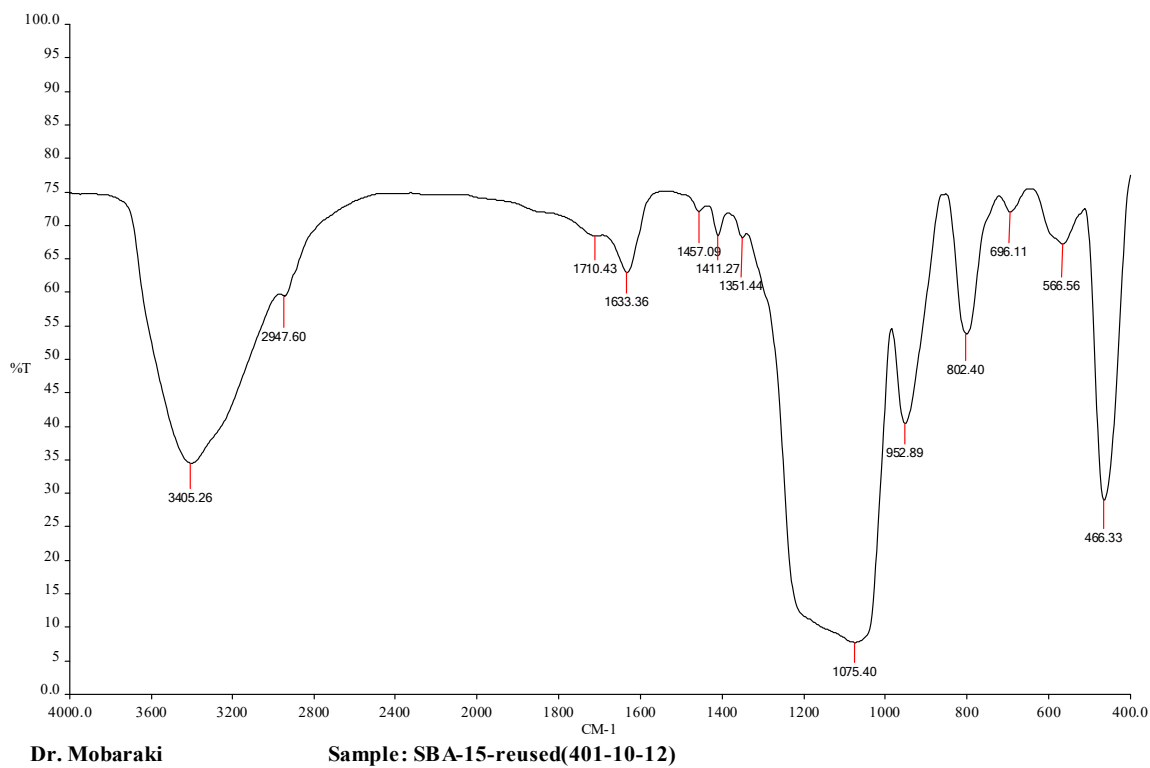

**Figure S10.** FT-IR spectrum of the Reused SBA-15-PrSO<sub>3</sub>H

## 1.2. Preparation of Et-PMO-Me-PrSO<sub>3</sub>H (1a) and its Characterizations

Organosulfonic acid-functionalized periodic mesoporous organosilicas Et-PMO-Me-PrSO<sub>3</sub>H was synthesized by a modification according to the methods of Hamoudi and co-workers.<sup>12</sup> In a typical preparation procedure, 0.66 g of Pluronic P123(EO<sub>20</sub>PO<sub>70</sub>EO<sub>20</sub>) was dissolved in 70 ml of HCl (2M) solution with stirring at room temperature. After addition and agitation of 2.77 g 1,2-bis(triethoxysilyl)-ethane (BTEE) for 3 h at 35 °C as a backbone of PMO, 0.478 g of thiol precursor 3-mercaptopropylmethyldimethoxysilane (MPMDS) was added and stirred for about 24 h at 35 °C. White precipitates were obtained after aging the mixture at 85 °C for 24 h under static conditions. The solid was recovered by filtration, washing (by deionized water) and dried at room temperature for 24 h. The residual block copolymer was removed from the as-synthesized material by washing with ethanol using a Soxhlet apparatus for 24 h. Conversion of thiol groups of catalyst to sulfonic acid moieties was accomplished by hydrogen peroxide. Typically, 0.2 g of solid hydrophobic material was suspended in 8 g of aqueous 30 wt% H<sub>2</sub>O<sub>2</sub>. This suspension was stirred at room temperature in an Ar atmosphere for 24 h. After the oxidation treatment, the resulting solution was filtered and washed separately with deionized water and ethanol. Finally the wet material was suspended in 0.1M H<sub>2</sub>SO<sub>4</sub> solution for 2 h and then was washed several times with deionized water until neutral pH and dried at 60 °C under vacuum overnight to give the corresponding Et-PMO-Me-PrSO<sub>3</sub>H (**1a**).

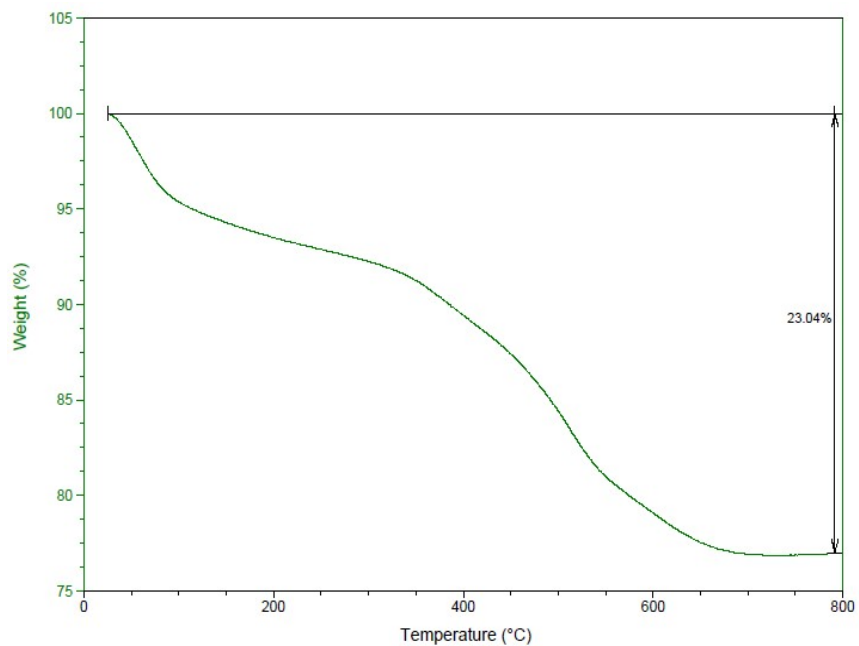

**Figure S11.** TGA diagram for Et-PMO-Me-PrSO<sub>3</sub>H

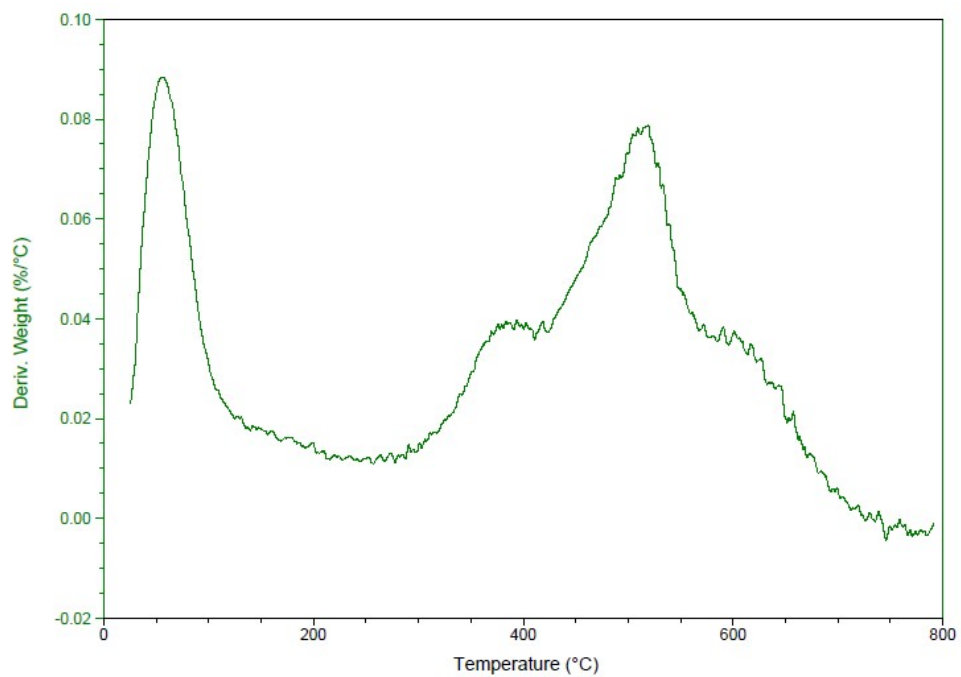

**Figure S12.** DTA diagram for Et-PMO-Me-PrSO<sub>3</sub>H

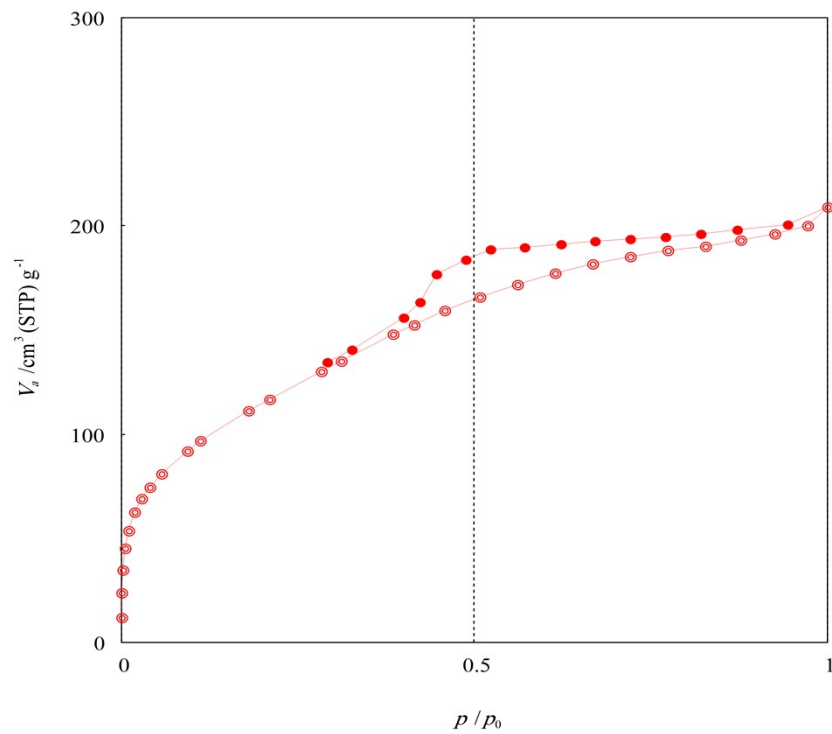

**Figure S13.** Nitrogen adsorption-desorption isotherm for Et-PMO-Me-PrSO<sub>3</sub>H

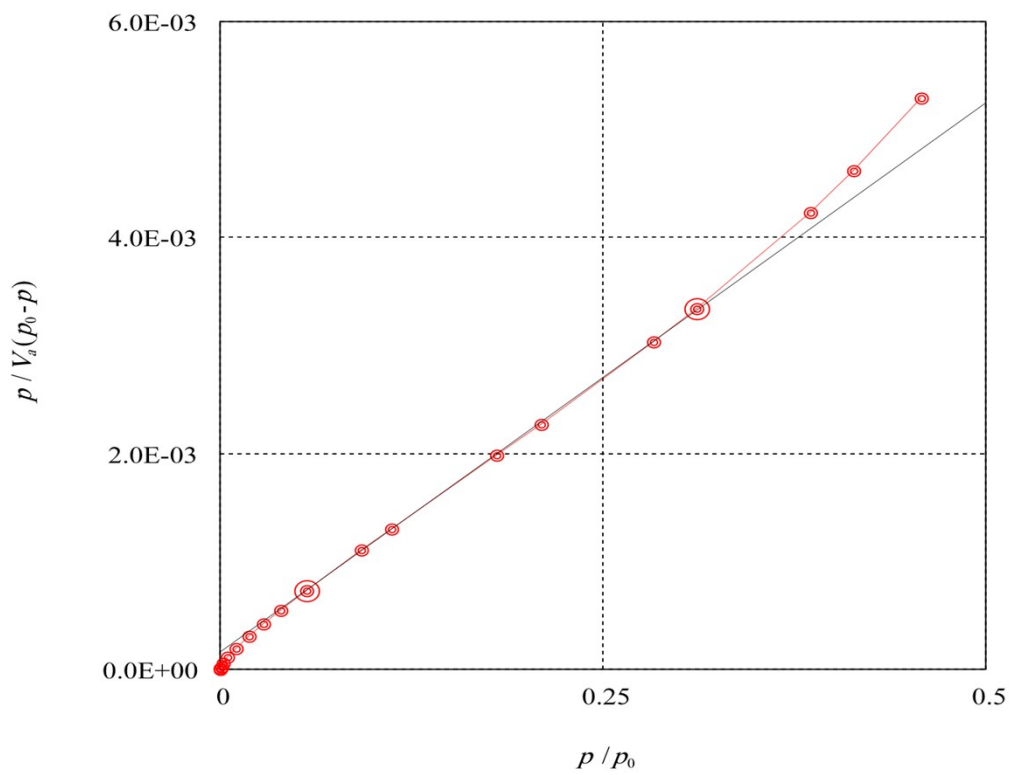

**Figure S14.** BET diagram for Et-PMO-Me-PrSO<sub>3</sub>H

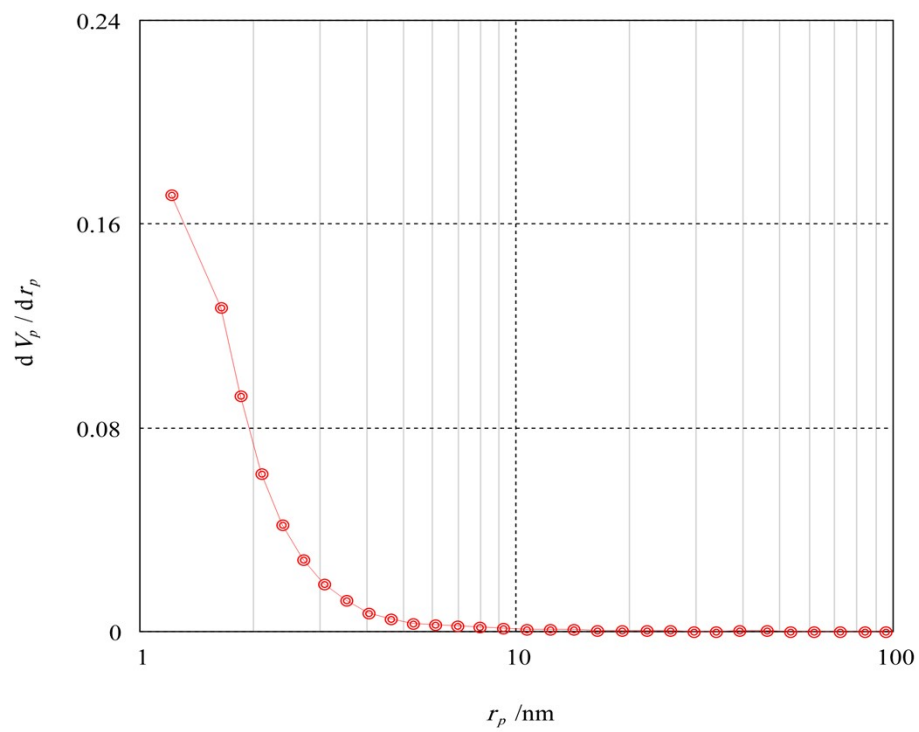

**Figure S15.** BJH average pore diameter diagram for Et-PMO-Me-PrSO<sub>3</sub>H

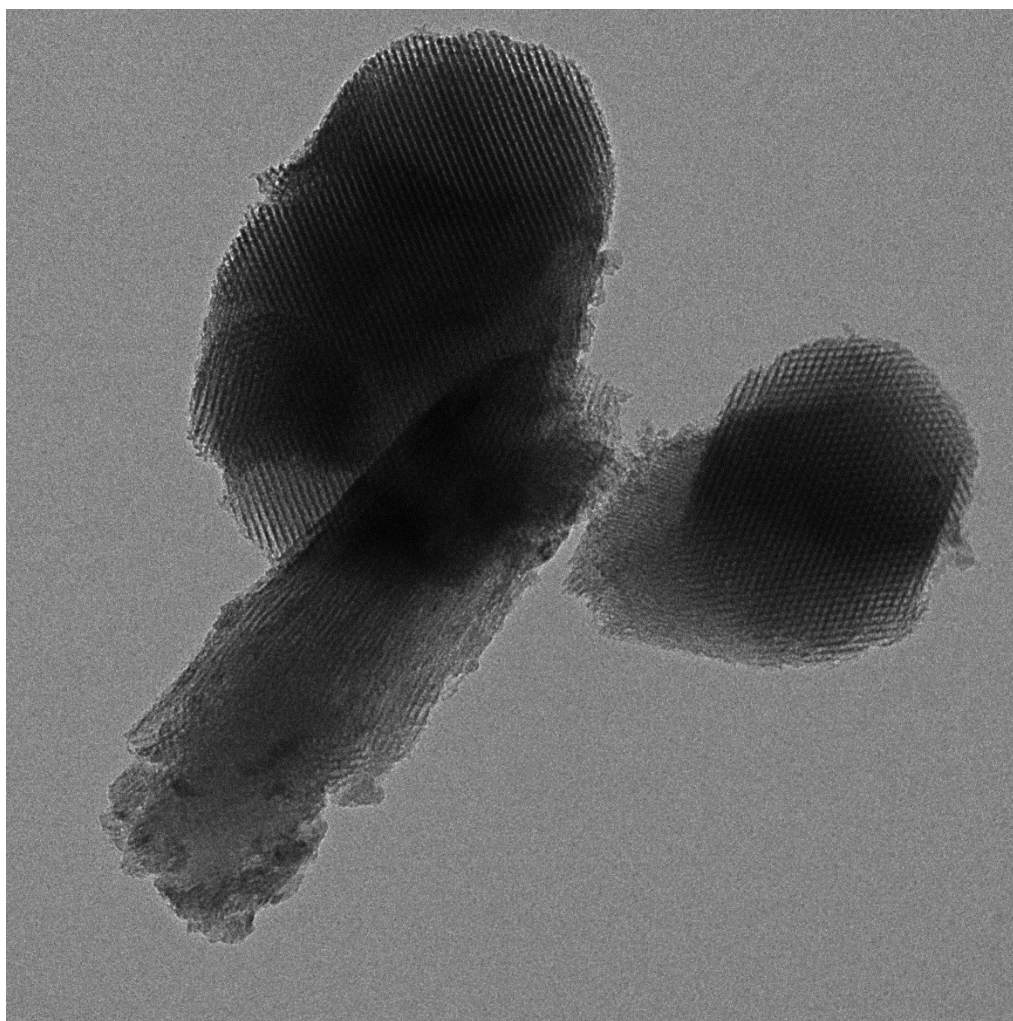

image-5.tif

HM-1

Print Mag: 40700x @ 51 mm

100 nm

HV=200.0kV

Direct Mag: 22000x

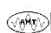

**Figure S16.** TEM image of Et-PMO-Me-PrSO<sub>3</sub>H

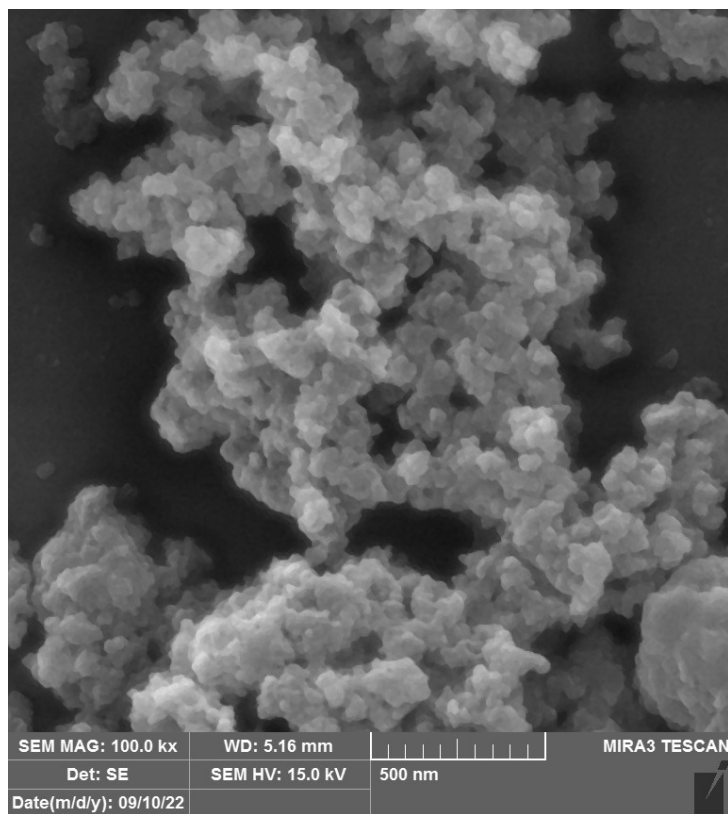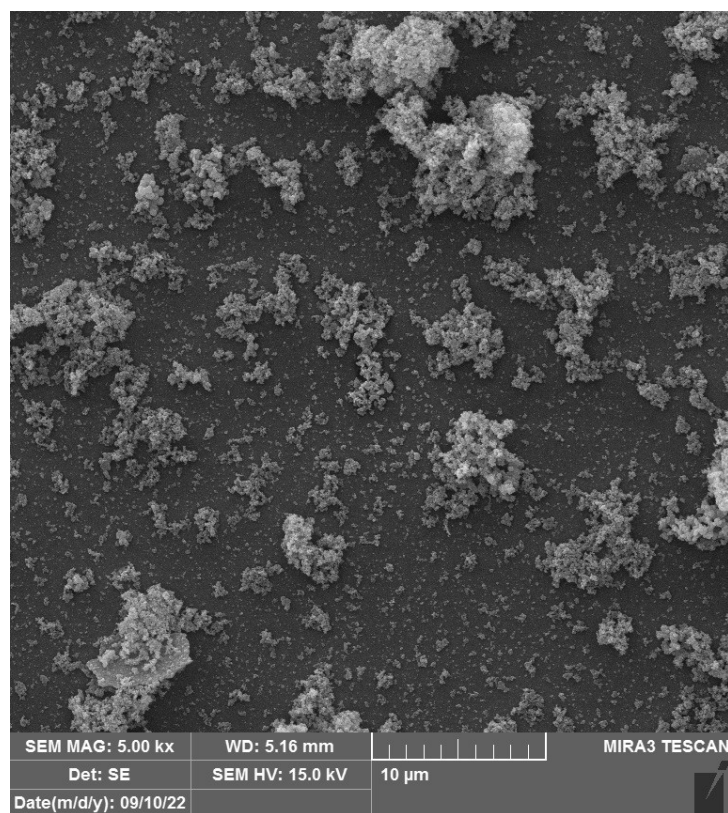

**Figure S17.** SEM images of the Et-PMO-Me-PrSO<sub>3</sub>H



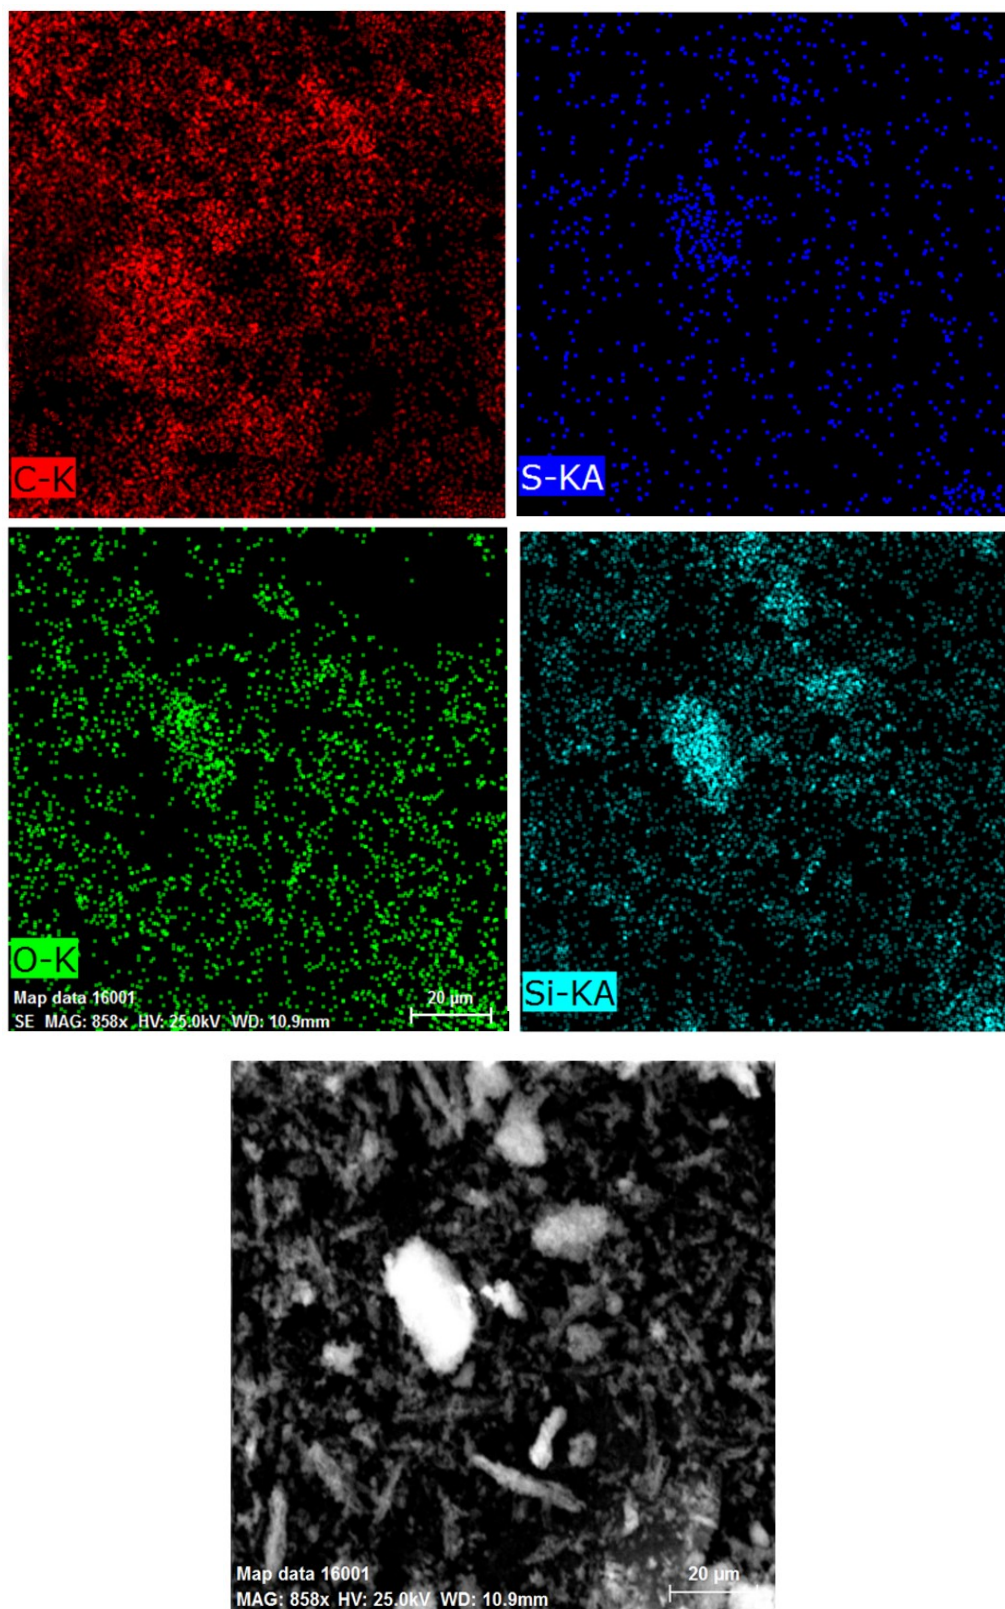

**Figure S18.** EDX mapping images of the Et-PMO-Me-PrSO<sub>3</sub>H

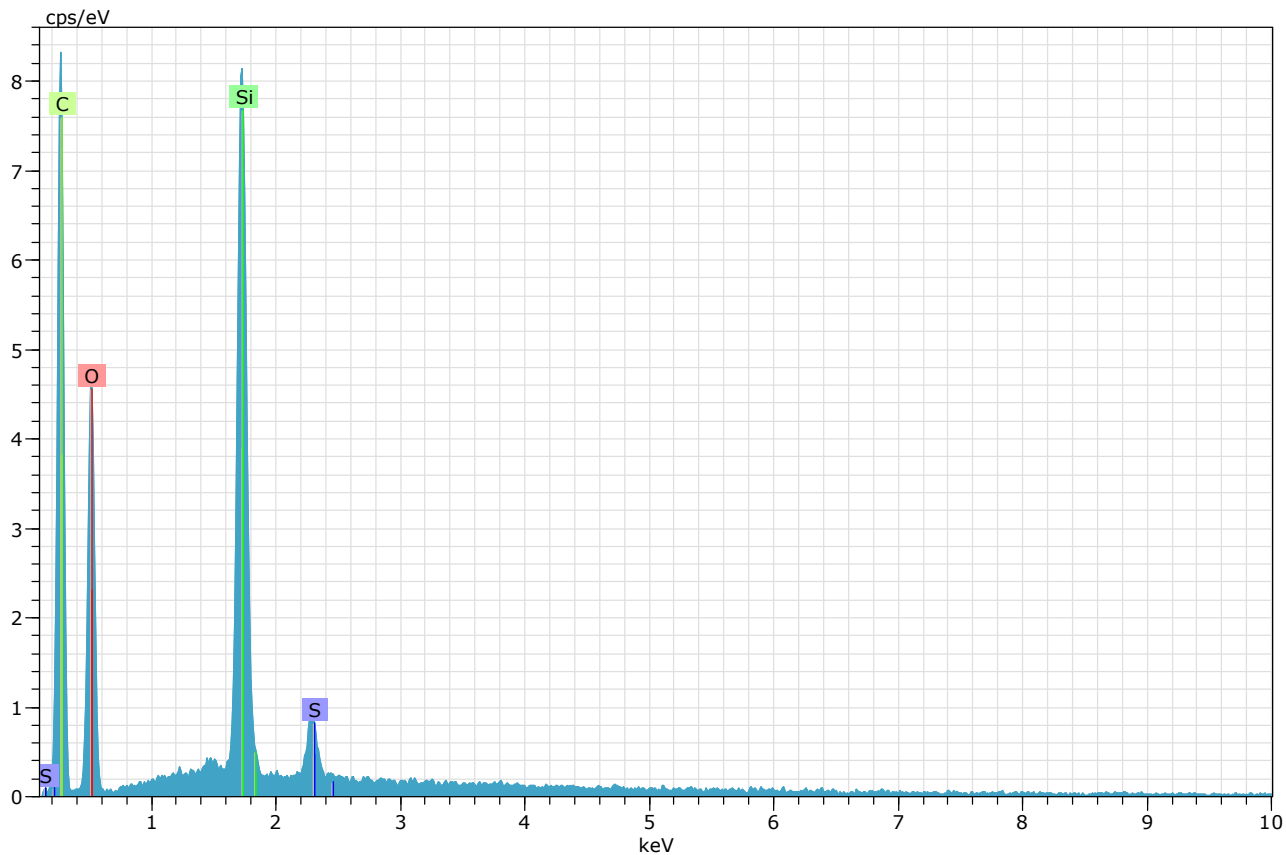

Et-PMO-Me-PrSO<sub>3</sub>H  
 Objects 6141

HV:25.0kV Puls th.:3.21kcps

| El     | AN | Series   | unn. C [wt.%] | norm. C [wt.%] | Atom. C [at.%] | Error (1 Sigma) [wt.%] |
|--------|----|----------|---------------|----------------|----------------|------------------------|
| C      | 6  | K-series | 54.82         | 54.82          | 63.54          | 7.93                   |
| O      | 8  | K-series | 37.75         | 37.75          | 32.84          | 5.93                   |
| Si     | 14 | K-series | 6.40          | 6.40           | 3.17           | 0.32                   |
| S      | 16 | K-series | 1.03          | 1.03           | 0.45           | 0.08                   |
| Total: |    |          | 100.00        | 100.00         | 100.00         |                        |

**Figure S19.** EDS spectrum of the Et-PMO-Me-PrSO<sub>3</sub>H

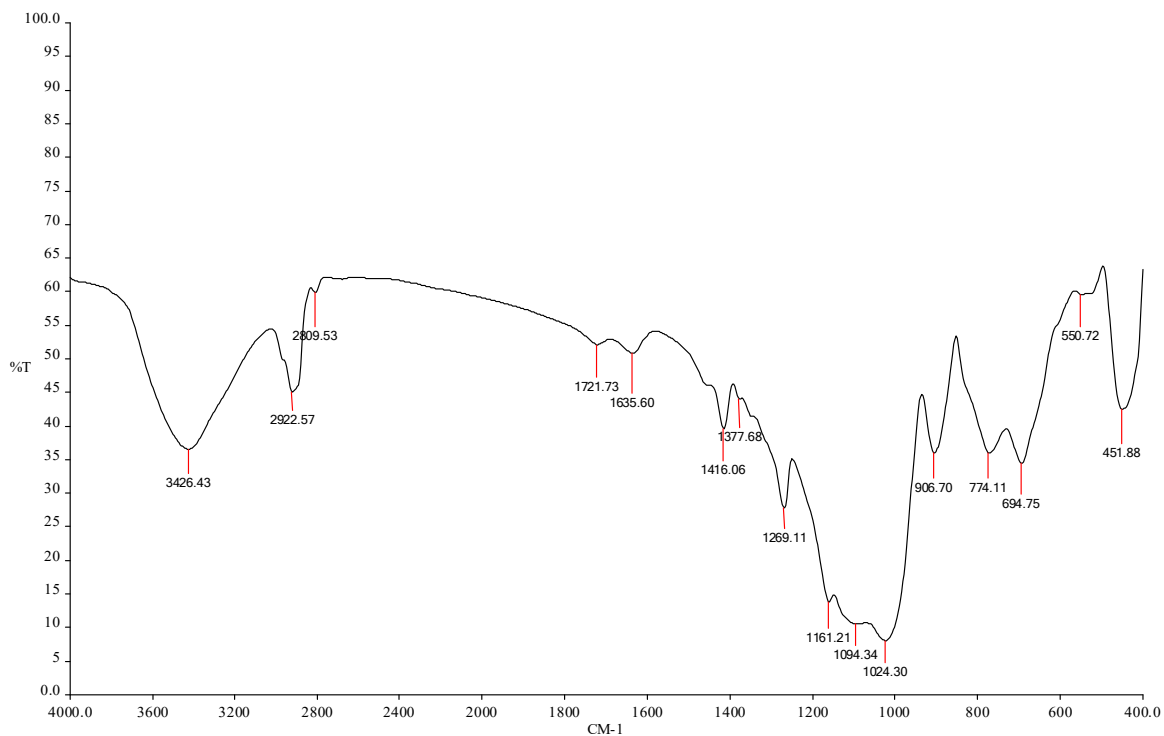

Dr. Mobaraki

Sample: Et-Pmo

Figure S20. FT-IR spectrum of the Et-PMO-Me-PrSO<sub>3</sub>H

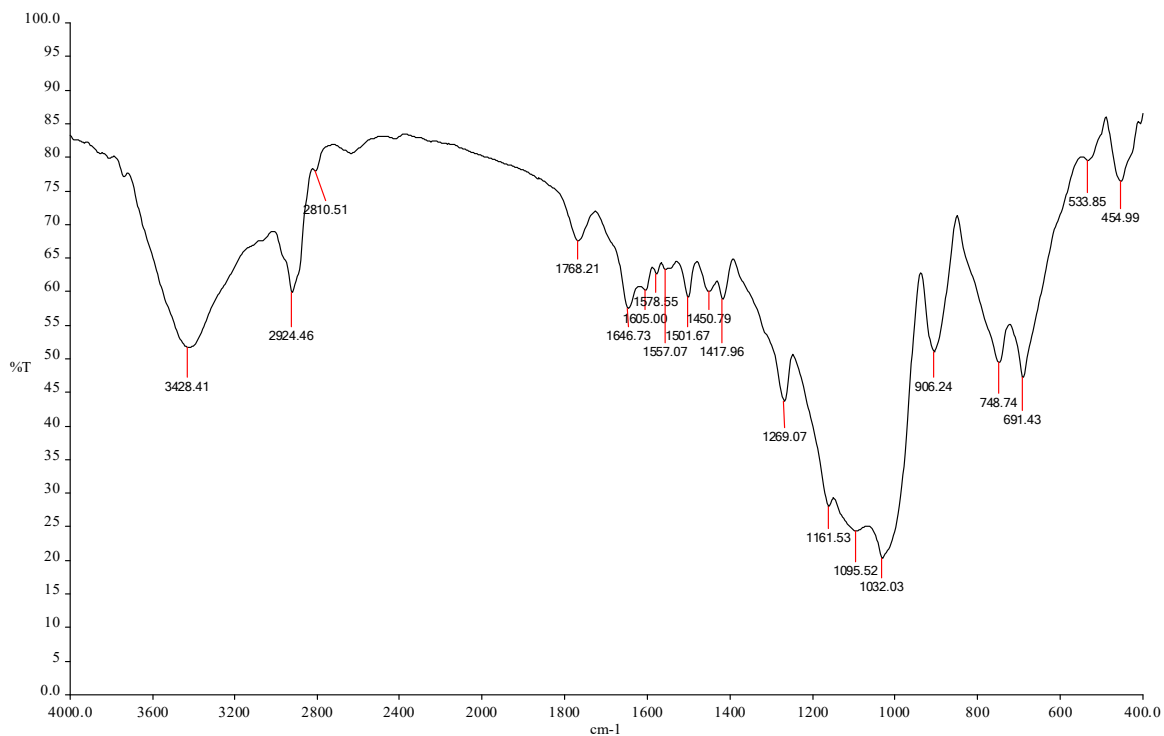

Sample: Et-pmo-reused

Figure S21. FT-IR spectrum of the reused Et-PMO-Me-PrSO<sub>3</sub>H

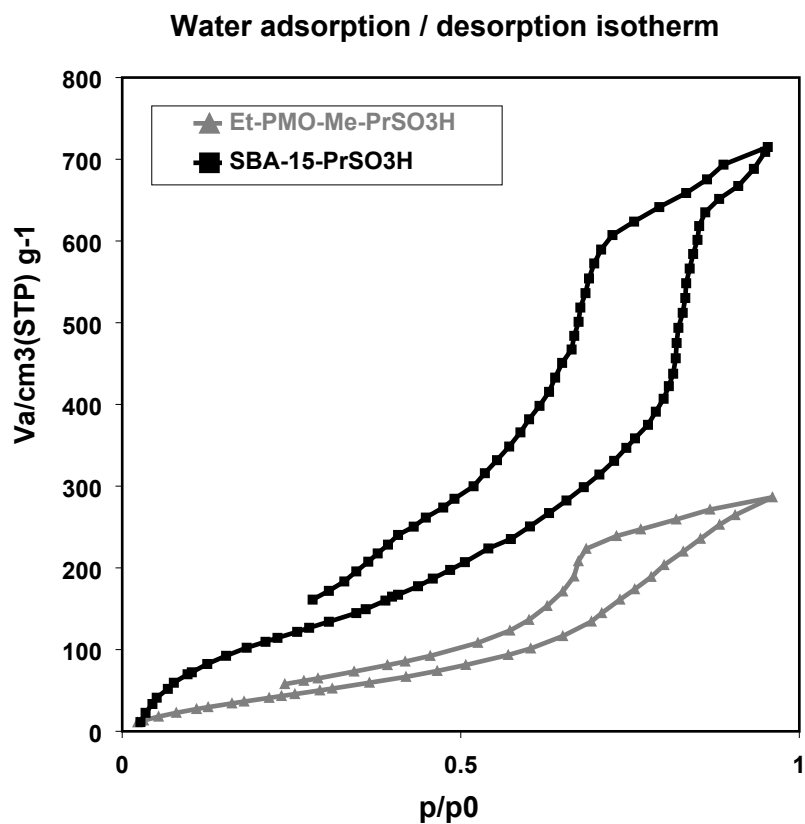

**Figure S22.** Water adsorption-desorption isotherms of Hydrophilic ordered mesoporous silica (OMS) based sulfonic acid (**1b**) and hydrophobic ethane-bridges PMO based sulfonic acid (**1a**) solids.

### **1.3. General procedure for the one-pot preparation of 2-aminobenzothiazoles**

A mixture of 2-aminothiophenol (2 mmol), isothiocyanate (2 mmol), were stirred at 100 °C for an appropriate time in solvent and catalyst-free condition (Table 2). The progress and completion of the reaction was monitored by TLC. After the completion of the reaction, the catalyst was separated with acetone by filtration to obtain the crude product. The crude products were recrystallized in ethylacetate and n-hexane mixture or acetone dependence to utilized isothiocyanate or subjected to silica gel column chromatography in order to further purification if it is necessary.

### **1.4. General procedure for the one-pot preparation of 2-substituted benzoxazole derivatives**

A mixture of 2-aminophenol or 2-aminoaniline (2 mmol), isothiocyanate (2 mmol), and catalysts (0.3 mol%) were stirred at 100 °C for an appropriate time in solvent-free condition (Table 4). The progress and completion of the reaction was monitored by TLC. After the completion of the reaction, the catalyst was separated with acetone by filtration to obtain the crude product. The crude products were recrystallized in ethylacetate and n-hexane mixture or acetone dependence to utilized isothiocyanate or subjected to silica gel column chromatography in order to further purification if it is necessary.

## 2. Spectral data for Table 3 and 5:

### 1. *N*-Phenylbenzo[*d*]thiazol-2-amine

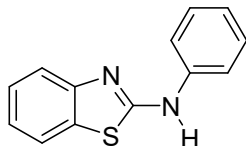

<sup>1</sup>H-NMR (400 MHz; *CDCl*<sub>3</sub>): δ<sub>H</sub>= 9.18(br, 1H, exchangeable with *D*<sub>2</sub>*O*), 7.66-7.68(d, *J*=8.0 Hz, 1H), 7.54-7.59(m, 3H), 7.43-7.47(t, *J*=7.6 Hz, 2H), 7.33-7.38(t, *J*=7.6 Hz, 1H), 7.17-7.24(qui, *J*=7.2 Hz, 2H); <sup>13</sup>C-NMR (100.6 MHz, *CDCl*<sub>3</sub>): δ<sub>C</sub> =165.4, 151.2, 140.0, 129.7, 129.6, 126.2, 124.5, 122.4, 120.9, 120.6, 119.2; IR(KBr) v.cm<sup>-1</sup>: 3452.5, 3232.8, 3185.5, 3126.0, 3055.3, 2997.4, 2942.1, 2853.2, 1622.0, 1563.9, 1497.5, 1455.8, 1322.6, 1260.3, 1235.3, 1218.0, 1223.8, 747.4, 713.4, 588.3.

Boiling point: 164.3-166.8 °C

### 2. *N*-*o*-Tolylbenzo[*d*]thiazol-2-amine

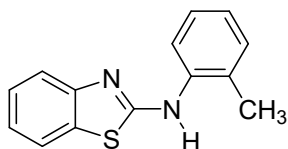

<sup>1</sup>H-NMR (400 MHz; *CDCl*<sub>3</sub>): δ<sub>H</sub>= 9.18(br, 1H, exchangeable with *D*<sub>2</sub>*O*), 7.66-7.68(d, *J* = 7.6 Hz, 1H), 7.59-7.61(d, *J* = 7.6 Hz, 1H), 7.34-7.39(m, 3H), 7.27-7.31(t, *J* = 7.6 Hz, 2H), 7.11-7.14(t, *J* = 7.6 Hz, 1H), 2.43(s, 3H); <sup>13</sup>C-NMR (100.6 MHz, *CDCl*<sub>3</sub>): δ<sub>C</sub> =168.4, 151.6, 138.4, 133.3, 131.4, 130.0, 127.3, 126.9, 126.1, 125.1, 121.9, 120.9, 118.6, 18.0; IR (KBr) v.cm<sup>-1</sup>: 3186.2, 3127.3, 3064.3, 3019.1, 2858.6, 1613.9, 1566.4, 1450.9, 1323.5, 1263.5, 1112.0, 1047.1, 1017.9, 925.6, 847.7, 752.8, 691.8, 599.4, 498.4, 429.9.

Boiling point: 129.2-131.3 °C

### 3. *N*-*m*-Tolylbenzo[*d*]thiazol-2-amine

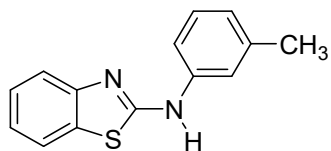

$^1\text{H-NMR}$  (400 MHz;  $\text{CDCl}_3$ ):  $\delta_{\text{H}} = 7.66\text{-}7.68(\text{d}, J = 7.6 \text{ Hz}, 1\text{H}), 7.59\text{-}7.61(\text{d}, J = 7.6 \text{ Hz}, 1\text{H}), 7.29\text{-}7.40(\text{m}, 4\text{H}), 7.19\text{-}7.23(\text{t}, J = 7.6 \text{ Hz}, 1\text{H}), 7.03\text{-}7.04(\text{d}, J = 4.4 \text{ Hz}, 1\text{H}), 2.41(\text{s}, 3\text{H})$ ;  $^1\text{H-NMR}$  (400 MHz;  $\text{D}_2\text{O}$ ):  $\delta_{\text{H}} = 7.66\text{-}7.68(\text{d}, J = 7.6 \text{ Hz}, 1\text{H}), 7.59\text{-}7.61(\text{d}, J = 7.6 \text{ Hz}, 1\text{H}), 7.29\text{-}7.40(\text{m}, 4\text{H}), 7.19\text{-}7.23(\text{t}, J = 7.6 \text{ Hz}, 1\text{H}), 7.03\text{-}7.04(\text{d}, J = 4.4 \text{ Hz}, 1\text{H}), 2.41(\text{s}, 3\text{H})$ ;  $^{13}\text{C-NMR}$  (100.6 MHz,  $\text{CDCl}_3$ ):  $\delta_{\text{C}} = 165.6, 150.2, 139.7, 139.6, 129.5, 129.1, 126.3, 125.6, 122.5, 121.3, 121.0, 118.8, 117.6, 21.5$ ; IR (KBr)  $\text{v.cm}^{-1}$ : 3454.8, 3232.3, 3189.9, 3134.5, 3052.8, 2925.9, 1621.5, 1571.7, 1481.8, 1450.1, 1322.6, 1243.4, 1161.4, 1025.3, 879.0, 745.3, 714.2, 674.3, 597.9, 530.7.

Boiling point: 126.2-128.5 °C

### 4. *N*-Ethylbenzo[*d*]thiazol-2-amine

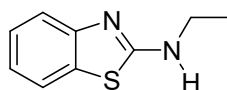

$^1\text{H-NMR}$  (400 MHz;  $\text{CDCl}_3$ ):  $\delta_{\text{H}} = 7.62\text{-}7.64(\text{d}, J = 8.0 \text{ Hz}, 1\text{H}), 7.55\text{-}7.57(\text{d}, J = 8.0 \text{ Hz}, 1\text{H}), 7.33\text{-}7.36(\text{t}, J = 8.0 \text{ Hz}, 1\text{H}), 7.12\text{-}7.16(\text{t}, J = 8.4 \text{ Hz}, 1\text{H}), 6.01(\text{br}, 1\text{H}, \text{exchangeable with } \text{D}_2\text{O}), 3.48\text{-}3.53(\text{q}, J = 8.4 \text{ Hz}, 2\text{H}), 1.35\text{-}1.39(\text{t}, J = 7.2 \text{ Hz}, 3\text{H})$ ;  $^{13}\text{C-NMR}$  (100.6 MHz,  $\text{CDCl}_3$ ):  $\delta_{\text{C}} = 167.5, 151.6, 129.9, 126.1, 121.6, 120.9, 118.6, 40.4, 14.8$ ; IR (KBr)  $\text{v.cm}^{-1}$ : 3408.9, 3229.4, 3053.6, 2971.6, 2926.6, 2305.2, 1607.9, 1554.5, 1449.1, 1386.9, 1346.7, 1263.7, 1215.2, 1093.4, 865.4, 800.9, 749.6, 461.0.

Boiling point: 66.3-68.4 °C



### 5. *N*-Allylbenzo[*d*]thiazol-2-amine

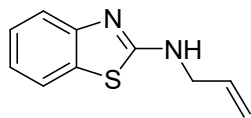

$^1\text{H-NMR}$  (400 MHz;  $\text{CDCl}_3$ ):  $\delta_{\text{H}} = 7.61\text{-}7.63(\text{d}, J = 7.6 \text{ Hz}, 1\text{H}), 7.54\text{-}7.56(\text{d}, J = 8.0 \text{ Hz}, 1\text{H}), 7.31\text{-}7.35(\text{t}, J = 7.6 \text{ Hz}, 1\text{H}), 7.10\text{-}7.14(\text{t}, J = 7.6 \text{ Hz}, 1\text{H}), 5.95\text{-}6.05(\text{m}, 1\text{H}), 5.37\text{-}5.41(\text{d}, J = 17.2 \text{ Hz}, 1\text{H}), 5.25\text{-}5.28(\text{d}, J = 10.4 \text{ Hz}, 1\text{H}), 4.08\text{-}4.10(\text{d}, J = 5.2 \text{ Hz}, 2\text{H})$ ;  $^1\text{H-NMR}$  (400 MHz;  $\text{D}_2\text{O}$ ):  $\delta_{\text{H}} = 7.61\text{-}7.63(\text{d}, J = 7.6 \text{ Hz}, 1\text{H}), 7.54\text{-}7.56(\text{d}, J = 8.0 \text{ Hz}, 1\text{H}), 7.31\text{-}7.35(\text{t}, J = 7.6 \text{ Hz}, 1\text{H}), 7.10\text{-}7.14(\text{t}, J = 7.6 \text{ Hz}, 1\text{H}), 5.95\text{-}6.05(\text{m}, 1\text{H}), 5.37\text{-}5.41(\text{d}, J = 17.2 \text{ Hz}, 1\text{H}), 5.25\text{-}5.28(\text{d}, J = 10.4 \text{ Hz}, 1\text{H}), 4.08\text{-}4.10(\text{d}, J = 5.2 \text{ Hz}, 2\text{H})$ ;  $^{13}\text{C-NMR}$  (100.6 MHz,  $\text{CDCl}_3$ ):  $\delta_{\text{C}} = 167.7, 152.0, 133.4, 130.2, 126.0, 121.6, 120.9, 118.8, 117.4, 47.8$ ; IR (KBr)  $\text{v.cm}^{-1}$ : 3447.8, 3190.2, 3056.1, 2964.7, 2896.8, 2235.4, 1607.6, 1541.4, 1439.4, 1338.4, 1267.0, 1222.0, 1095.0, 1021.8, 910.7, 864.5, 805.0, 748.6, 624.5, 554.8.

Boiling point: 82.3-84.9 °C

### 6. *N*-Phenethylbenzo[*d*]thiazol-2-amine

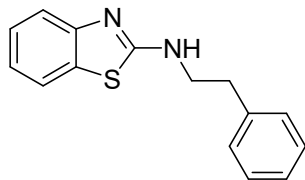

$^1\text{H-NMR}$  (400 MHz;  $\text{CDCl}_3$ ):  $\delta_{\text{H}} = 7.62\text{-}7.64(\text{d}, J = 7.6 \text{ Hz}, 1\text{H}), 7.53\text{-}7.55(\text{d}, J = 8.0 \text{ Hz}, 1\text{H}), 7.31\text{-}7.37(\text{m}, 3\text{H}), 7.25\text{-}7.29(\text{t}, J = 6.0 \text{ Hz}, 3\text{H}), 7.11\text{-}7.15(\text{t}, J = 7.6 \text{ Hz}, 1\text{H}), 6.17(\text{br}, 1\text{H}, \text{exchangeable with } \text{D}_2\text{O}), 3.69\text{-}3.73(\text{t}, J = 6.8 \text{ Hz}, 2\text{H}), 3.01\text{-}3.05(\text{t}, J = 6.8 \text{ Hz}, 2\text{H})$ ;  $^{13}\text{C-NMR}$  (100.6 MHz,  $\text{CDCl}_3$ ):  $\delta_{\text{C}} = 167.6, 152.4, 138.4, 130.3, 128.9, 128.8, 126.7, 126.0, 121.5, 120.9, 118.8, 46.7, 35.6$ ; IR (KBr)  $\text{v.cm}^{-1}$ : 3455.2, 3233.6, 3194.6, 3093.2, 2909.4, 1622.2, 1568.2, 1480.8, 1440.8, 1348.3, 1264.3, 1182.6, 1109.4, 1010.0, 880.5, 749.2, 696.0, 657.1, 531.6, 493.3.

Boiling point: 153.3-155.8 °C

7. *N*-(4-fluorophenyl)benzo[*d*]thiazol-2-amine

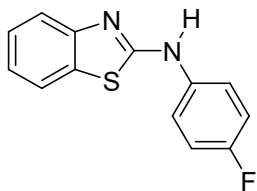

$^1\text{H-NMR}$  (400 MHz;  $\text{CDCl}_3$ ):  $\delta_{\text{H}}$ =10.53(br, 1H, exchangeable with  $\text{D}_2\text{O}$ ), 7.80-7.85(m, 3H), 7.60-7.62(d,  $J = 8.0$  Hz, 1H), 7.31-7.35(t,  $J = 7.6$  Hz, 1H), 7.14-7.24(m, 3H);  $^{13}\text{C-NMR}$  (100.6 MHz,  $\text{CDCl}_3$ ):  $\delta_{\text{C}} = 162.1, 157.8$  (d,  $J_{\text{C-F}} = 239.4$  Hz), 152.4, 137.6 (d,  $J_{\text{C-F}} = 1.0$  Hz), 130.4, 126.4, 122.8, 121.5, 119.9 (d,  $J_{\text{C-F}} = 8.0$  Hz), 119.6, 116.0 (d,  $J_{\text{C-F}} = 22.1$  Hz); IR (KBr)  $\text{v.cm}^{-1}$ : 3449.6, 3194.5, 3136.0, 3048.7, 2909.7, 1627.4, 1568.7, 1508.1, 1449.7, 1327.1, 1277.4, 1215.8, 1094.8, 1017.6, 919.6, 834.3, 790.7, 736.2, 668.2, 581.1.

Boiling point: 204.5-206.7  $^{\circ}\text{C}$

## 1. Benzo[d]oxazole-2-thiol

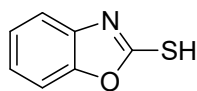

$^1\text{H-NMR}$  (400 MHz; *DMSO*):  $\delta_{\text{H}}$  = 13.87(br, 1H, exchangeable with  $D_2O$ ), 7.50-7.52(m, 1H), 7.24-7.32(m, 3H);  $^{13}\text{C-NMR}$  (100.6 MHz, *DMSO*):  $\delta_{\text{C}}$  = 180.6, 148.6, 131.6, 125.6, 124.3, 110.9, 110.9; IR (KBr)  $\nu.\text{cm}^{-1}$ : 3343.2, 2922.2, 1614.0, 1556.3, 1504.2, 1443.3, 1268.9, 1126.9, 1089.4, 926.4, 805.3, 744.0, 646.8.

Boiling point: 197.6-199.8 °C

## 2. *N*-Phenylbenzo[d]oxazol-2-amine

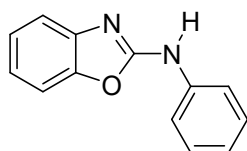

$^1\text{H-NMR}$  (400 MHz; *DMSO*):  $\delta_{\text{H}}$  = 10.63(br, 1H, exchangeable with  $D_2O$ ), 7.78-7.80(d,  $J$  = 8.0 Hz, 2H), 7.46-7.50(t,  $J$  = 6.8 Hz, 2H), 7.36-7.40(t,  $J$  = 7.6 Hz, 2H), 7.21-7.25(td,  $J$  = 7.6 Hz,  $J$  = 0.8 Hz, 1H), 7.11-7.15(td,  $J$  = 8.0 Hz,  $J$  = 0.8 Hz, 1H), 7.02-7.06(t,  $J$  = 7.6 Hz, 1H);  $^{13}\text{C-NMR}$  (100.6 MHz, *DMSO*):  $\delta_{\text{C}}$  = 158.5, 147.5, 142.9, 139.2, 129.4, 124.5, 122.6, 122.1, 118.0, 117.0, 109.4; IR (KBr)  $\nu.\text{cm}^{-1}$ : 3381.1, 3165.2, 3034.6, 2961.9, 1938.0, 1867.6, 1654.3, 1571.7, 1490.9, 1364.4, 1229.9, 1159.2, 1094.2, 1018.2, 888.4, 805.4, 737.3, 685.5, 497.5.

Boiling point: 181.5-183.7 °C

### 3. *N*-*o*-Tolylbenzo[*d*]oxazol-2-amine

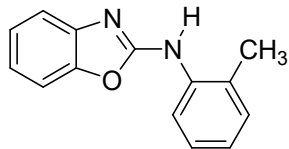

$^1\text{H-NMR}$  (400 MHz; *DMSO*):  $\delta_{\text{H}}$  = 9.69(br, 1H, exchangeable with  $D_2O$ ), 7.82-7.84(d,  $J$  = 8.4 Hz, 1H), 7.45-7.47(d,  $J$  = 8.0 Hz, 1H), 7.36-7.38(d,  $J$  = 7.6 Hz, 1H), 7.25-7.26(m, 2H), 7.17-7.21(t,  $J$  = 7.6 Hz, 1H), 7.07-7.11(t,  $J$  = 7.2 Hz, 2H), 2.31(s, 3H);  $^{13}\text{C-NMR}$  (100.6 MHz, *DMSO*):  $\delta_{\text{C}}$  = 160.0, 147.9, 143.0, 137.0, 131.0, 130.7, 126.9, 124.9, 124.4, 123.1, 121.7, 116.8, 109.3, 18.3; IR (KBr)  $\nu\cdot\text{cm}^{-1}$ : 3446.6, 3025.8, 2962.1, 2862.2, 2357.8, 1661.5, 1585.8, 1460.3, 1348.7, 1236.5, 1177.3, 1104.1, 1011.2, 964.9, 799.3, 732.1, 465.2.

Boiling point: 145.0-147.2 °C

### 4. *N*-*m*-Tolylbenzo[*d*]oxazol-2-amine

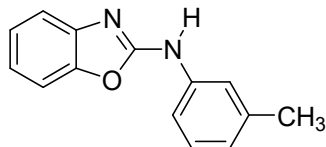

$^1\text{H-NMR}$  (400 MHz;  $CDCl_3$ ):  $\delta_{\text{H}}$  = 7.49-7.53(d,  $J$  = 6.4 Hz, 1H), 7.40-7.46(t,  $J$  = 7.6 Hz, 3H), 7.31-7.34(t,  $J$  = 12.8 Hz, 2H), 7.21-7.23(t,  $J$  = 8.0 Hz, 1H), 6.88-6.89(d,  $J$  = 6.8 Hz, 1H), 5.92(br, 1H, exchangeable with  $D_2O$ ), 2.43(s, 3H);  $^{13}\text{C-NMR}$  (100.6 MHz,  $CDCl_3$ ):  $\delta_{\text{C}}$  = 159.0, 147.9, 141.8, 139.3, 137.9, 129.2, 124.4, 124.3, 121.7, 119.5, 116.7, 115.9, 109.3, 21.6; IR (KBr)  $\nu\cdot\text{cm}^{-1}$ : 3449.2, 3171.3, 3042.2, 2962.8, 1652.6, 1577.3, 1497.9, 1459.6, 1346.7, 1244.3, 1173.4, 1096.6, 1015.0, 927.3, 865.9, 805.1, 738.3, 681.6, 640.9, 431.1.

Boiling point: 148.2-150.1 °C

## 5. *N*-Ethylbenzo[*d*]oxazol-2-amine

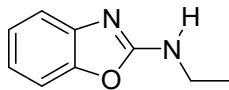

<sup>1</sup>H-NMR (400 MHz; *CDCl*<sub>3</sub>): δ<sub>H</sub> = 7.37-7.39(d, *J* = 7.6 Hz, 1H), 7.26-7.28(d, *J* = 8.8 Hz, 1H), 7.17-7.21(t, *J* = 7.6 Hz, 1H), 7.04-7.08(t, *J* = 7.6 Hz, 1H), 5.65(s, 1H, exchangeable with *D*<sub>2</sub>*O*), 3.54-3.59(q, *J* = 7.2 Hz, 2H), 1.33-1.37(t, *J* = 7.2 Hz, 3H); <sup>13</sup>C-NMR (100.6 MHz, *CDCl*<sub>3</sub>): δ<sub>C</sub> = 161.9, 148.3, 142.4, 124.0, 120.9, 116.0, 108.8, 38.0, 15.2; IR (KBr) ν.cm<sup>-1</sup>: 3457.0, 3159.6, 3052.8, 2963.6, 2878.3, 1695.9, 1578.9, 1459.5, 1333.4, 1245.8, 1144.8, 1097.9, 1056.9, 1012.5, 968.6, 807.5, 736.3, 578.6.

Boiling point: 93.7-95.2 °C

## 6. *N*-Allylbenzo[*d*]oxazol-2-amine

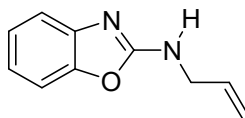

<sup>1</sup>H-NMR (400 MHz; *CDCl*<sub>3</sub>): δ<sub>H</sub> = 7.37-7.39(d, *J* = 8.0 Hz, 1H), 7.27-7.29(d, *J* = 6.4 Hz, 1H), 7.17-7.21(t, *J* = 7.6 Hz, 1H), 7.04-7.08(t, *J* = 7.6 Hz, 1H), 6.03(s, 1H, exchangeable with *D*<sub>2</sub>*O*), 5.97-6.07(m, 1H), 5.34-5.38(dd, *J* = 17.2 Hz, *J* = 1.2 Hz, 1H), 5.23-5.26(dd, *J* = 10.4 Hz, *J* = 1.2 Hz, 1H), 4.14-4.16(d, *J* = 5.6 Hz, 2H); <sup>13</sup>C-NMR (100.6 MHz, *CDCl*<sub>3</sub>): δ<sub>C</sub> = 161.9, 148.4, 142.4, 133.8, 124.0, 120.9, 116.9, 116.2, 108.9, 45.4; IR (KBr) ν.cm<sup>-1</sup>: 3450.8, 3157.6, 3058.8, 2965.7, 2915.8, 1665.3, 1582.2, 1488.8, 1459.9, 1344.4, 1247.2, 1177.3, 1096.2, 1030.3, 910.9, 804.2, 740.8, 688.2, 644.4.

Boiling point: 71.9-73.3 °C

## 7. *N*-Phenethylbenzo[*d*]oxazol-2-amine

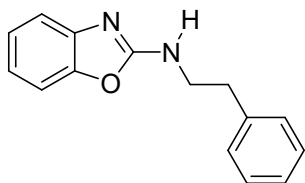

$^1\text{H-NMR}$  (400 MHz;  $\text{CDCl}_3$ ):  $\delta_{\text{H}} = 8.04\text{-}8.07(\text{t}, J = 5.6 \text{ Hz}, 1\text{H}, \text{exchangeable with } D_2O), 7.26\text{-}7.34(\text{m}, 6\text{H}), 7.21\text{-}7.23(\text{tt}, J = 1.6 \text{ Hz}, J = 6.8 \text{ Hz}, 1\text{H}), 7.09\text{-}7.13(\text{td}, J = 7.6 \text{ Hz}, J = 0.8 \text{ Hz}, 1\text{H}), 6.96\text{-}7.00(\text{td}, J = 7.6 \text{ Hz}, J = 1.2 \text{ Hz}, 1\text{H}), 3.52\text{-}3.57(\text{q}, J = 6.8 \text{ Hz}, 2\text{H}), 2.91\text{-}2.94(\text{t}, J = 7.2 \text{ Hz}, 1\text{H})$ ;  $^{13}\text{C-NMR}$  (100.6 MHz,  $\text{CDCl}_3$ ):  $\delta_{\text{C}} = 162.7, 148.5, 143.8, 139.6, 129.2, 128.3, 126.6, 124.0, 120.5, 115.9, 108.9, 44.2, 35.3$ ; IR (KBr)  $\nu.\text{cm}^{-1}$ : 3302.0, 3198.3, 3151.9, 3060.5, 2949.9, 1664.7, 1580.7, 1458.3, 1342.6, 1244.8, 1199.3, 1149.6, 1097.6, 1005.5, 959.8, 908.9, 846.8, 741.0, 694.8, 574.8.

Boiling point: 100.8-102.4 °C

## 8. *N*-(4-Fluorophenyl)benzo[*d*]oxazol-2-amine

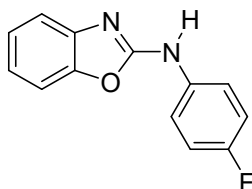

$^1\text{H-NMR}$  (400 MHz;  $\text{CDCl}_3$ ):  $\delta_{\text{H}} = 8.96(\text{s}, 1\text{H}, \text{exchangeable with } D_2O), 7.57\text{-}7.60(\text{q}, J = 4.4 \text{ Hz}, 2\text{H}), 7.46\text{-}7.48(\text{d}, J = 8.0 \text{ Hz}, 1\text{H}), 7.38\text{-}7.40(\text{d}, J = 8.0 \text{ Hz}, 1\text{H}), 7.25\text{-}7.29(\text{t}, J = 7.2 \text{ Hz}, 1\text{H}), 7.14\text{-}7.18(\text{m}, 3\text{H})$ ;  $^{13}\text{C-NMR}$  (100.6 MHz,  $\text{CDCl}_3$ ):  $\delta_{\text{C}} = 160.3, 158.4$  (d,  $J_{\text{C-F}} = 99.6 \text{ Hz}$ ), 147.8, 141.6, 135.2, 133.8, 124.7 (d,  $J_{\text{C-F}} = 54.3 \text{ Hz}$ ), 121.9, 120.6 (d,  $J_{\text{C-F}} = 8.0 \text{ Hz}$ ), 116.4 (d,  $J_{\text{C-F}} = 53.3 \text{ Hz}$ ), 115.9; IR (KBr)  $\nu.\text{cm}^{-1}$ : 3452.7, 3171.9, 3042.5, 2956.7, 1655.8, 1580.8, 1502.9, 1459.1, 1356.0, 1251.9, 1216.9, 1157.3, 1095.4, 969.1, 820.3, 742.3, 627.5, 587.4, 505.6.

Boiling point: 185.2-187.3 °C

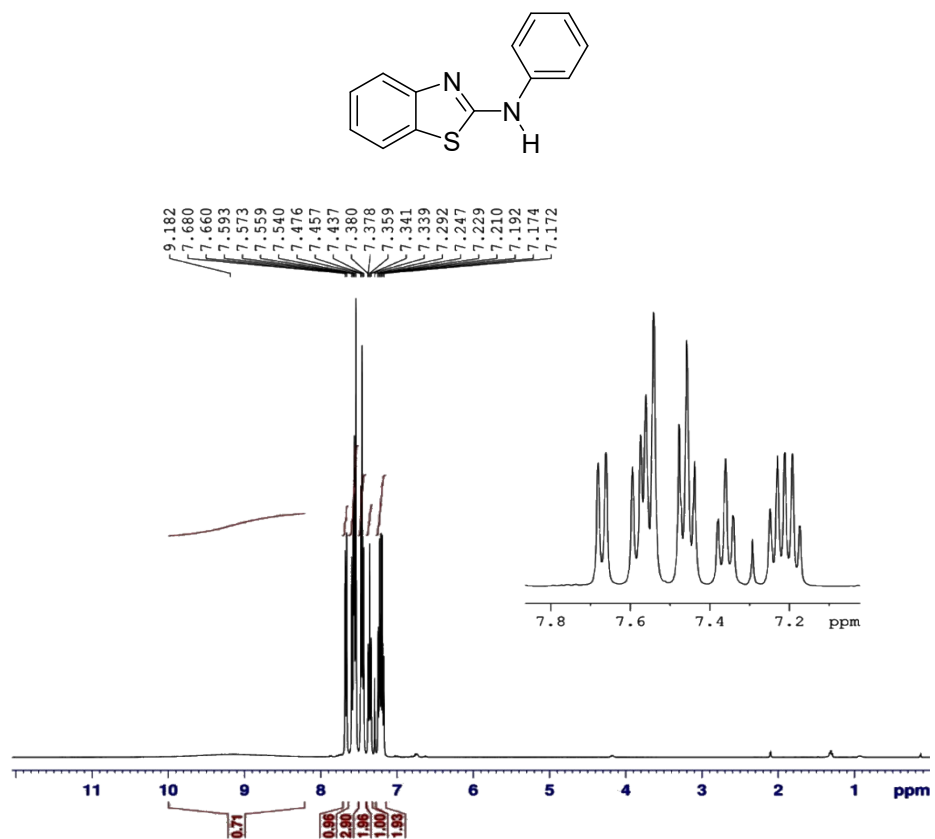

Figure S23. <sup>1</sup>H-NMR spectrum of *N*-phenylbenzo[d]thiazol-2-amine in CDCl<sub>3</sub>

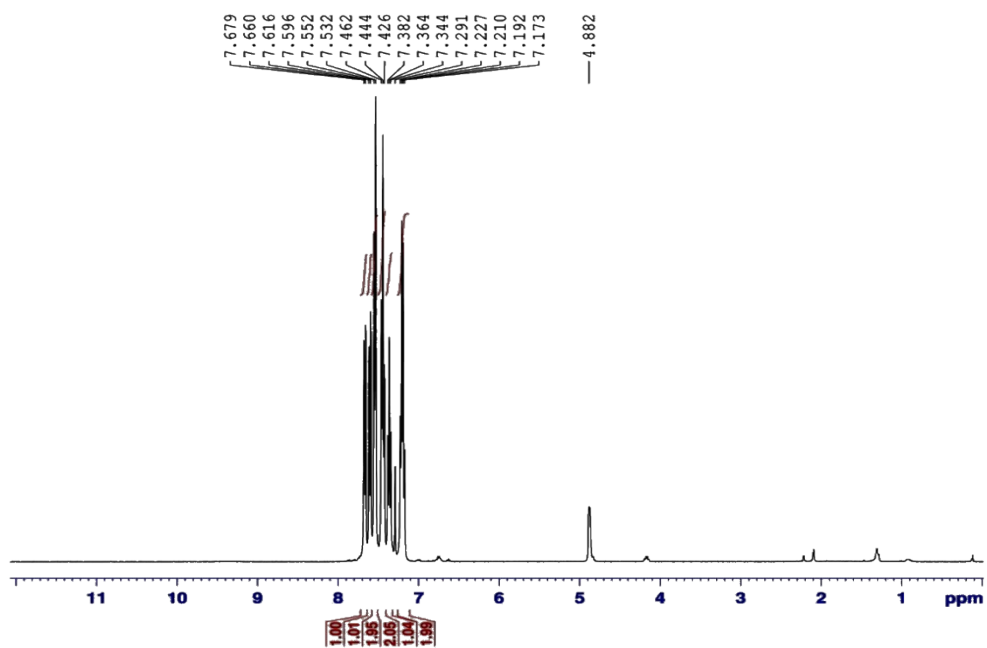

Figure S24. <sup>1</sup>H-NMR spectrum of *N*-phenylbenzo[d]thiazol-2-amine in CDCl<sub>3</sub> (D<sub>2</sub>O as exchanged solvent is used)

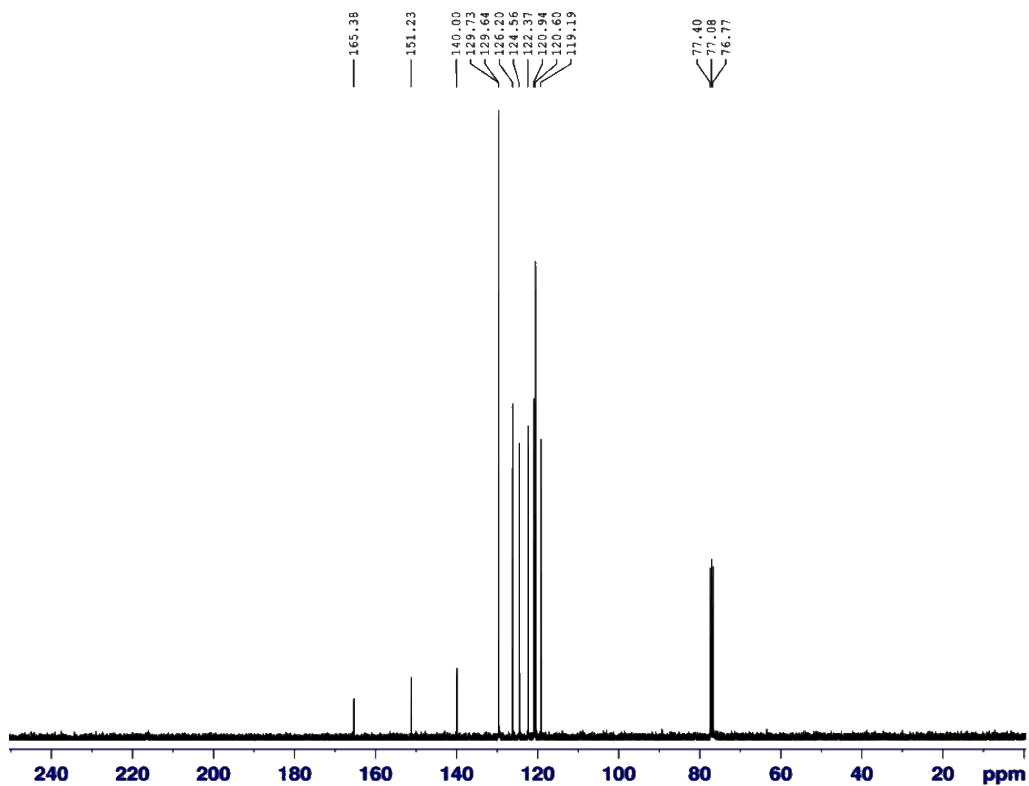

Figure S25.  $^{13}\text{C}$ -NMR spectrum of *N*-phenylbenzo[d]thiazol-2-amine in  $\text{CDCl}_3$

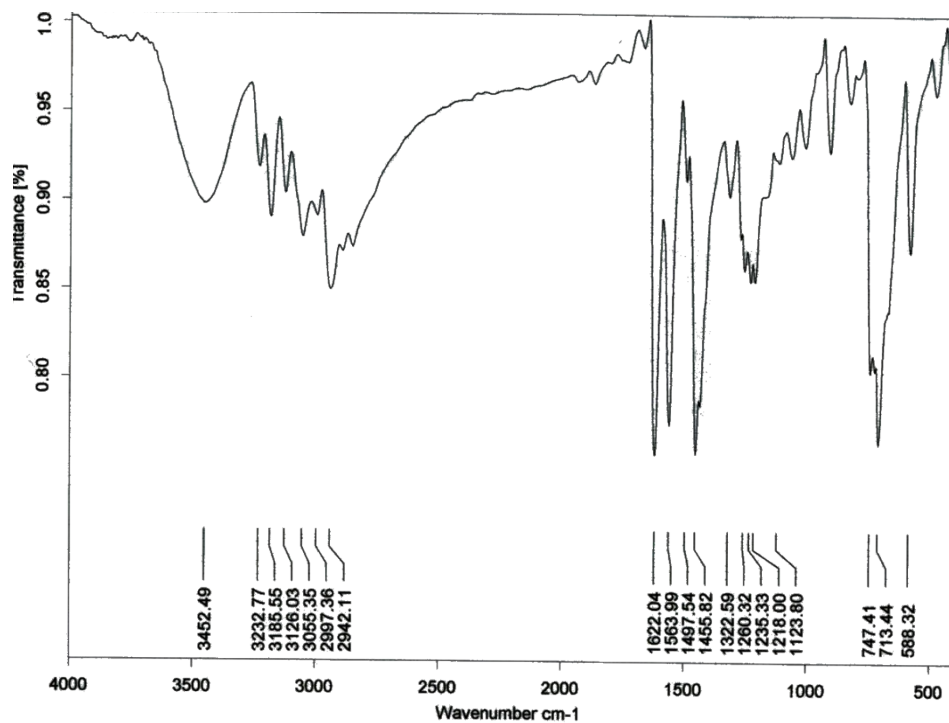

Figure S26. IR (KBr discs) spectrum of *N*-phenylbenzo[d]thiazol-2-amine



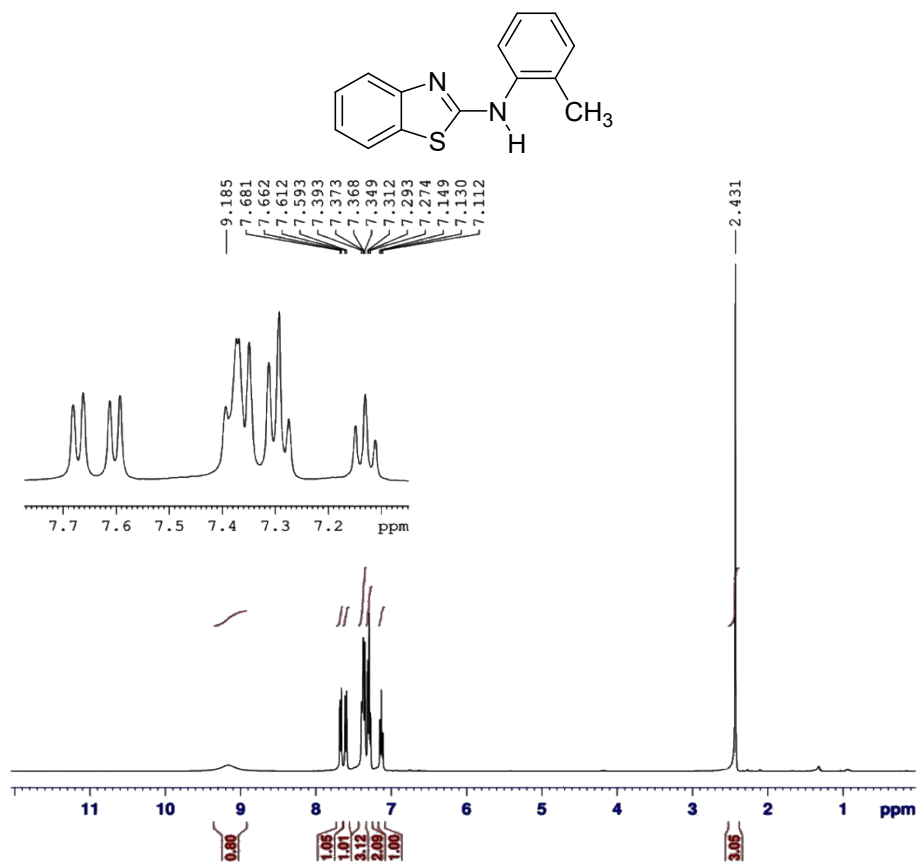

Figure S27.  $^1\text{H-NMR}$  spectrum of *N*-*o*-tolylbenzo[*d*]thiazol-2-amine in  $\text{CDCl}_3$

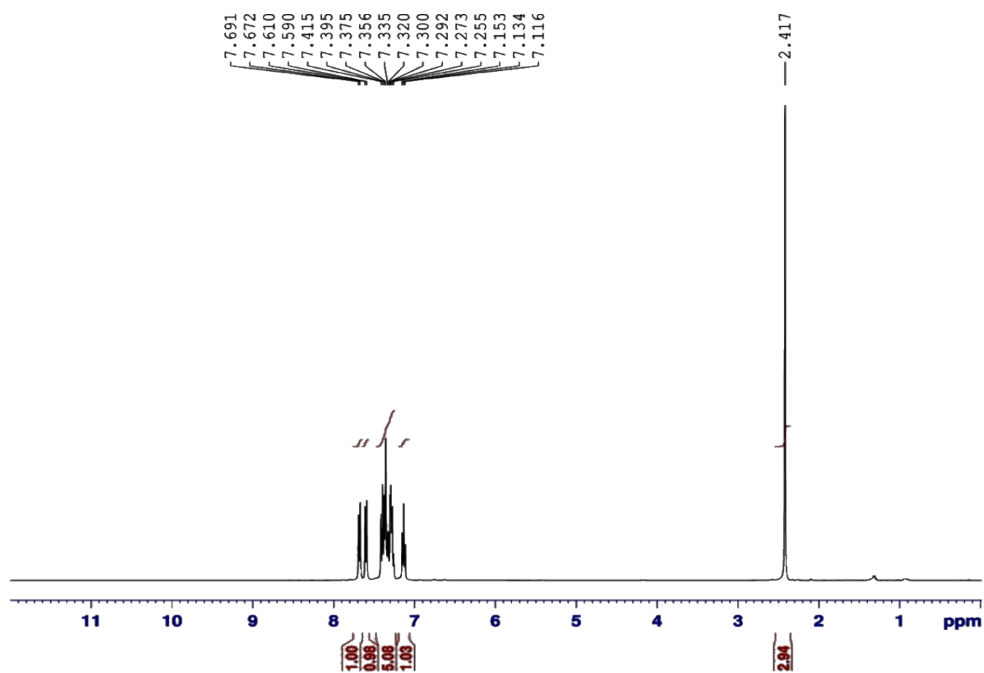

Figure S28.  $^1\text{H-NMR}$  spectrum of *N*-*o*-tolylbenzo[*d*]thiazol-2-amine in  $\text{CDCl}_3$  ( $\text{D}_2\text{O}$  as exchanged solvent is used)

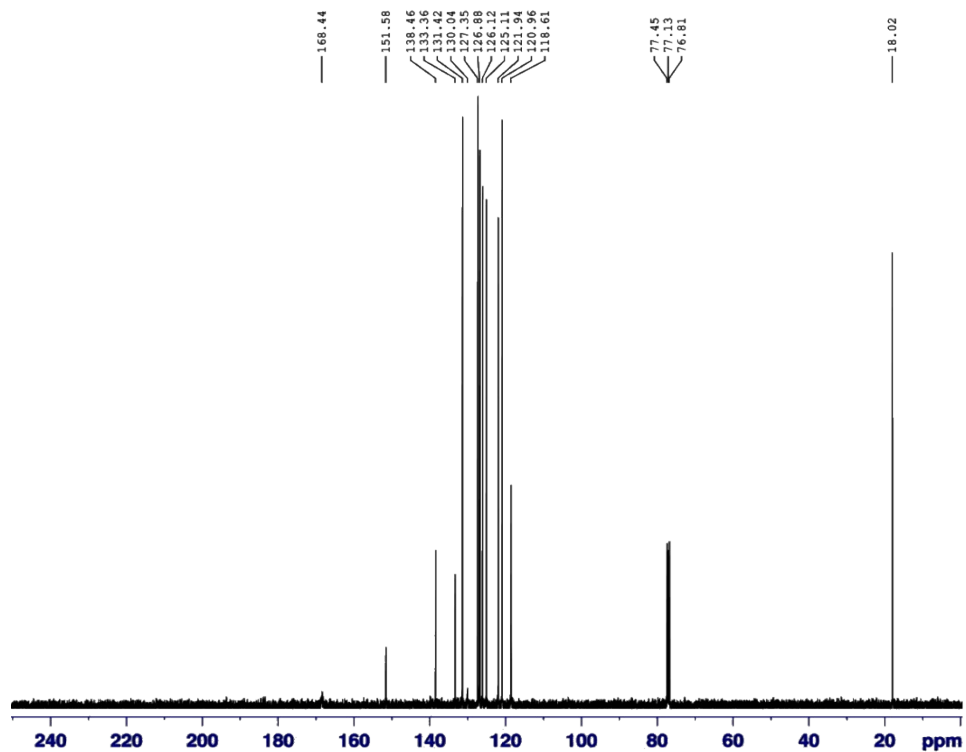

Figure S29.  $^{13}\text{C}$ -NMR spectrum of *N*-*o*-tolylbenzo[*d*]thiazol-2-amine in  $\text{CDCl}_3$

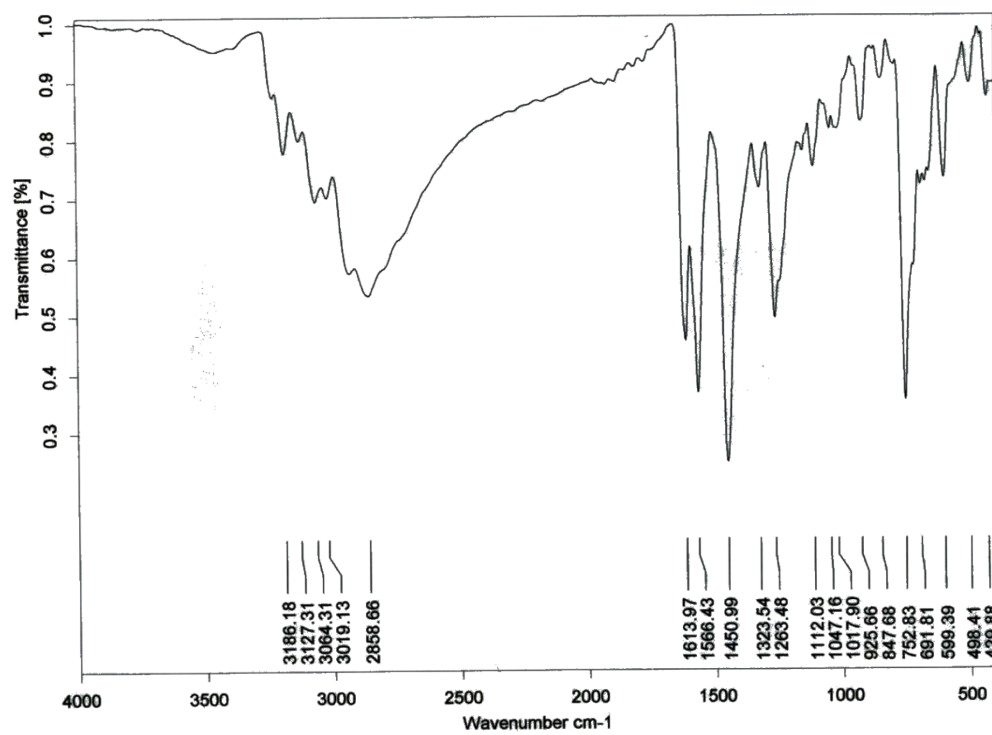

Figure S30. IR (KBr discs) spectrum of *N*-*o*-tolylbenzo[*d*]thiazol-2-amine

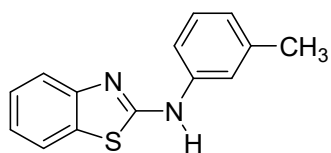

Sample code:Thia 9

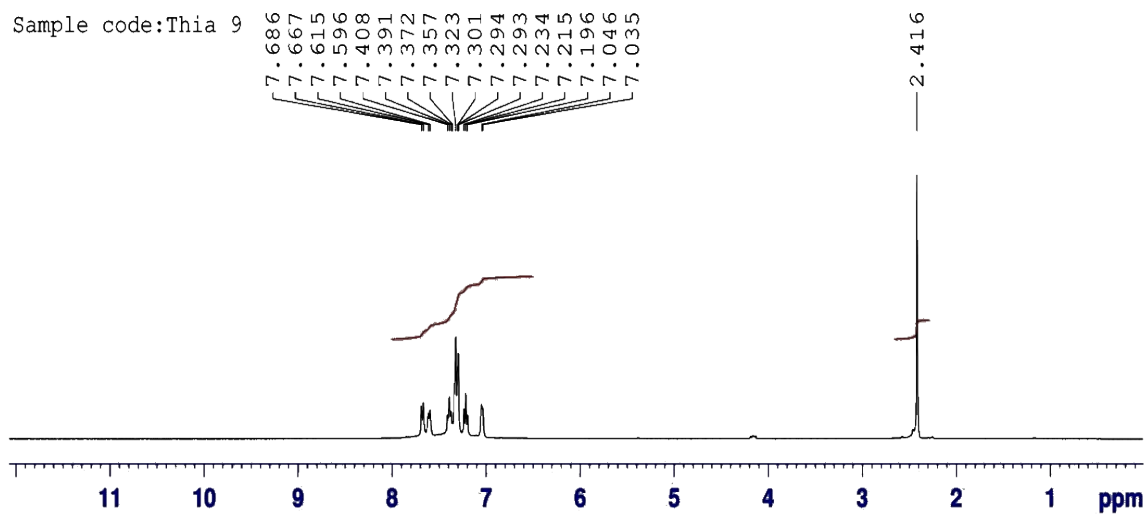

Sample code:Thia 9+D2O

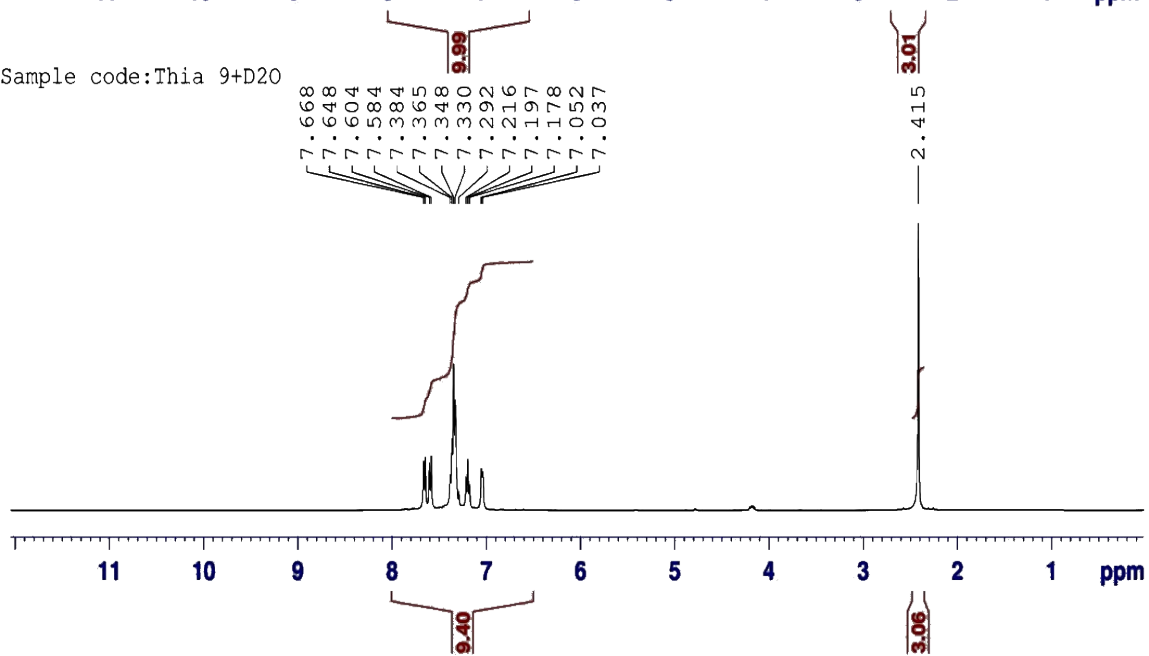

Figure S31.  $^1\text{H-NMR}$  spectrum of *N-m-tolylbenzo[d]thiazol-2-amine* in  $\text{CDCl}_3$

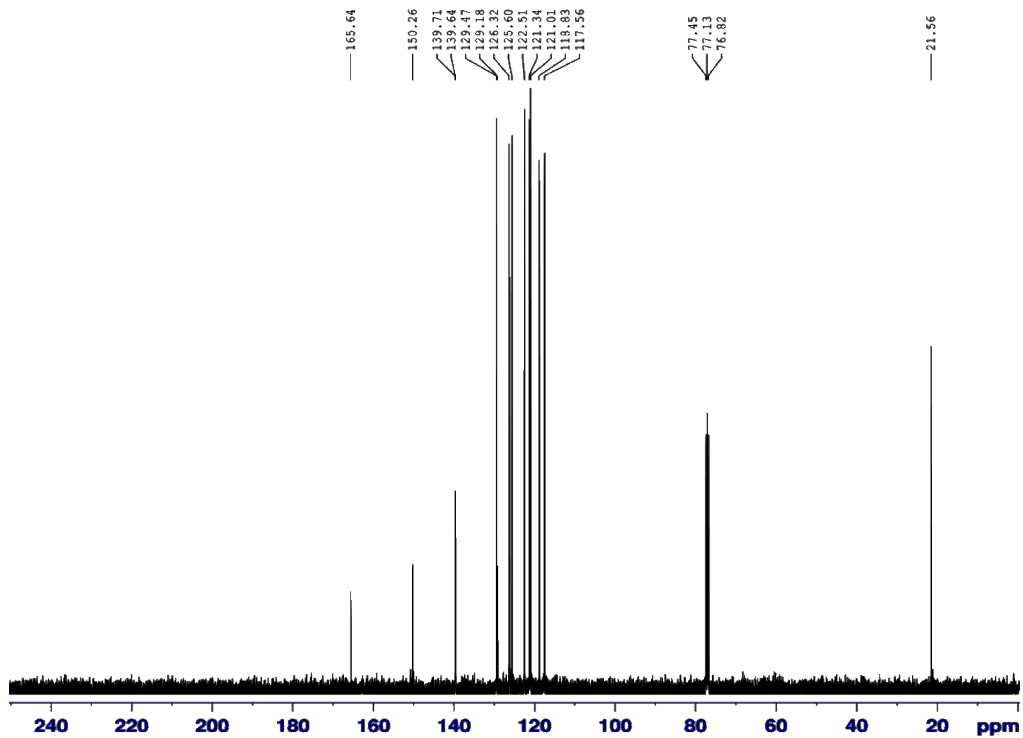

Figure S32.  $^{13}\text{C}$ -NMR spectrum of *N*-*m*-tolylbenzo[*d*]thiazol-2-amine in  $\text{CDCl}_3$

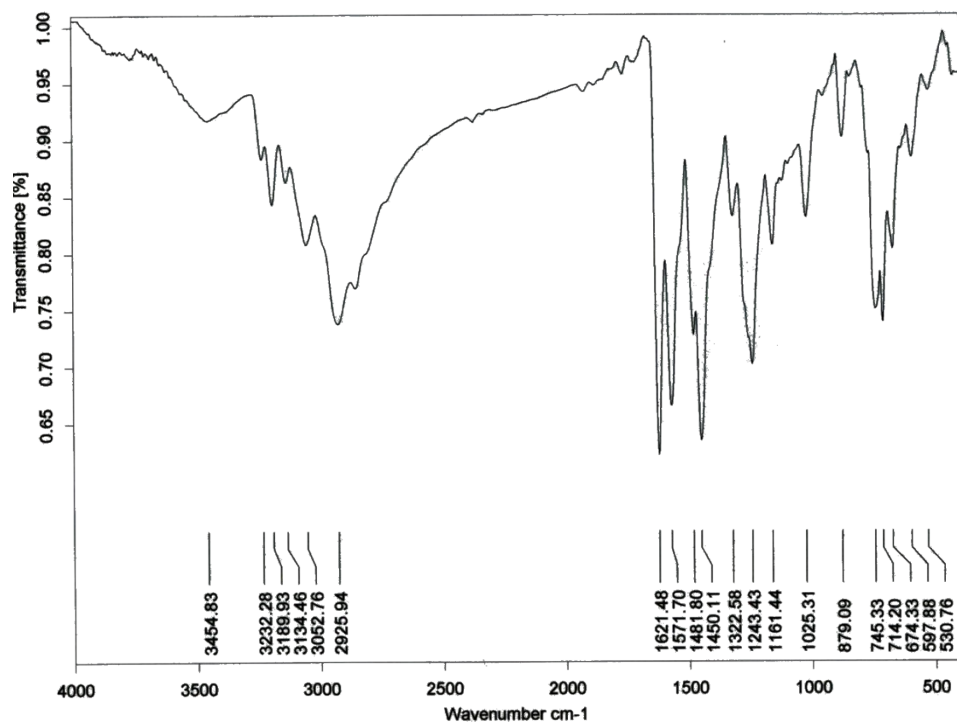

Figure S33. IR (KBr discs) spectrum of *N*-*m*-tolylbenzo[*d*]thiazol-2-amine

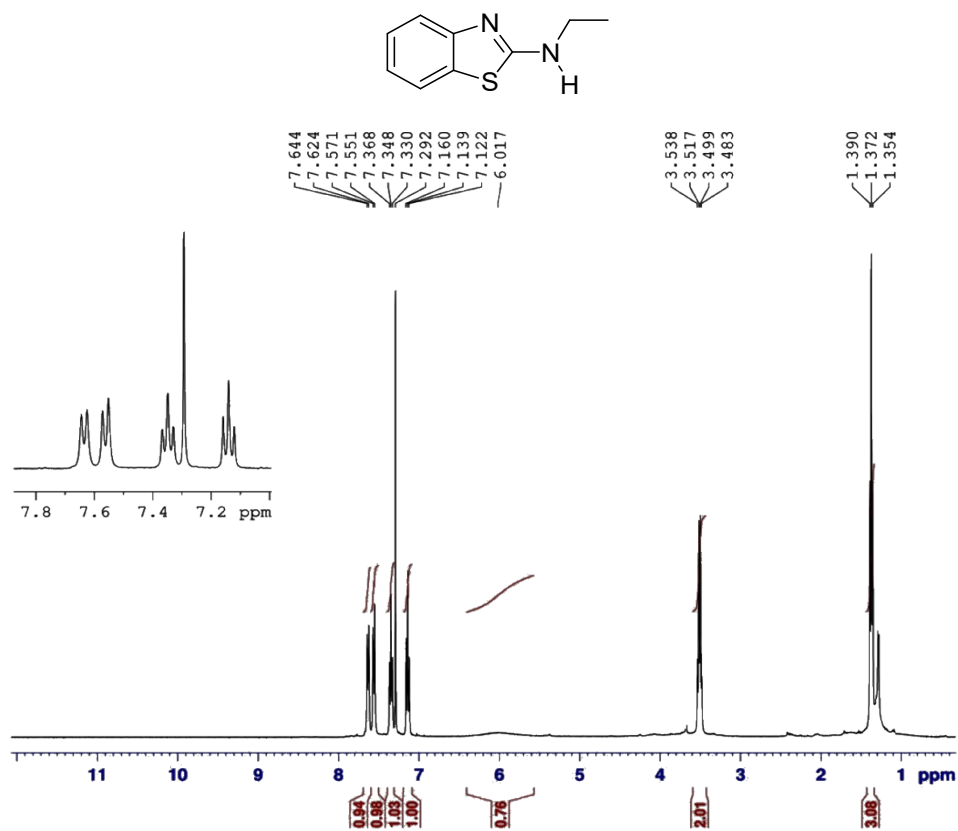

Figure S34.  $^1\text{H-NMR}$  spectrum of *N*-ethylbenzo[*d*]thiazol-2-amine in  $\text{CDCl}_3$

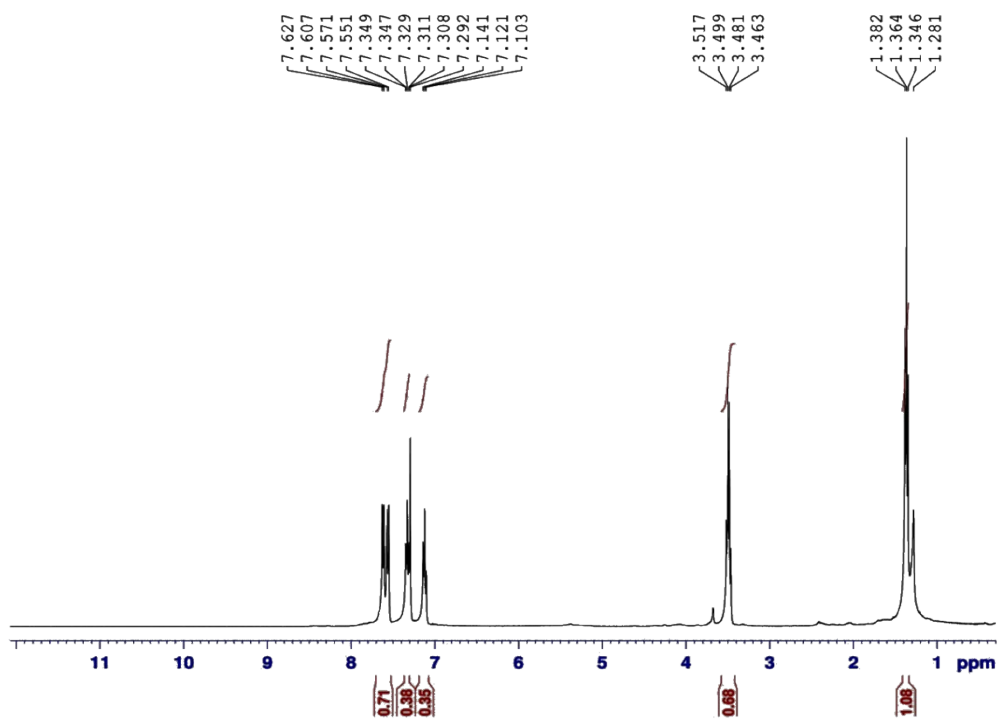

Figure S35.  $^1\text{H-NMR}$  spectrum of *N*-ethylbenzo[*d*]thiazol-2-amine in  $\text{CDCl}_3$  ( $\text{D}_2\text{O}$  as exchanged solvent is used)

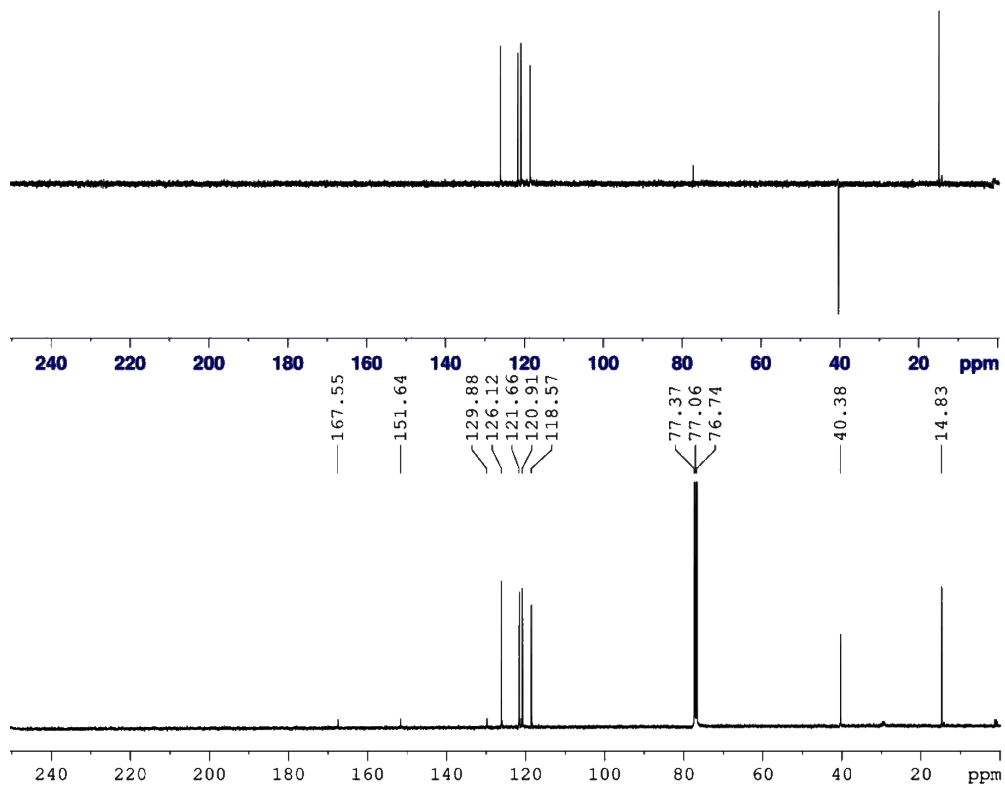

Figure S36.  $^{13}\text{C}$ -NMR and DEPT 135 spectra of *N*-ethylbenzo[*d*]thiazol-2-amine in  $\text{CDCl}_3$

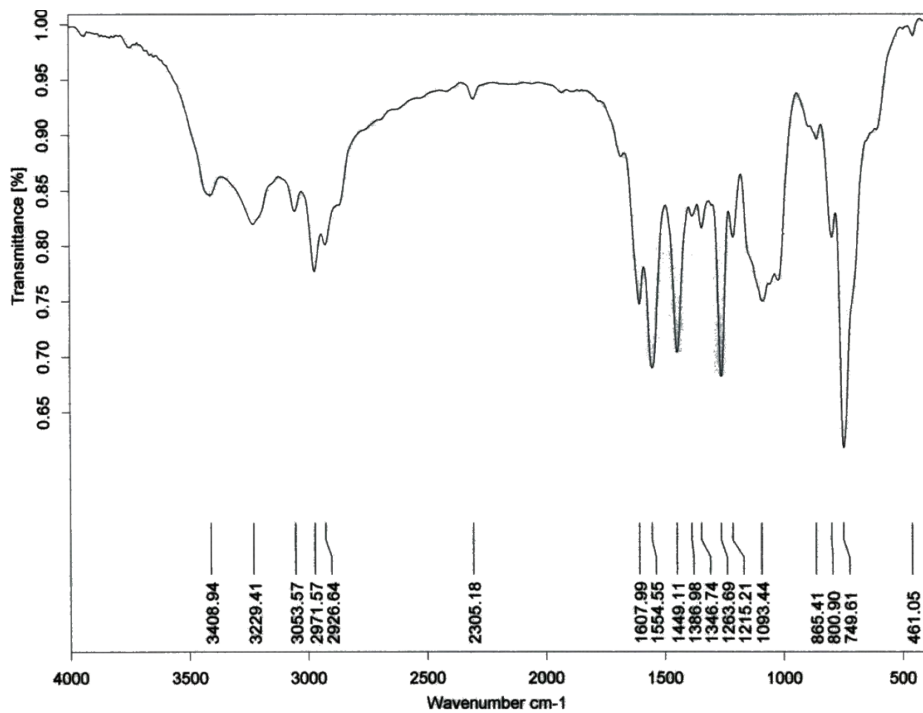

Figure S37. IR (KBr discs) spectrum of *N*-ethylbenzo[*d*]thiazol-2-amine

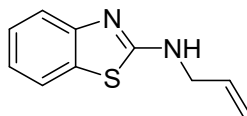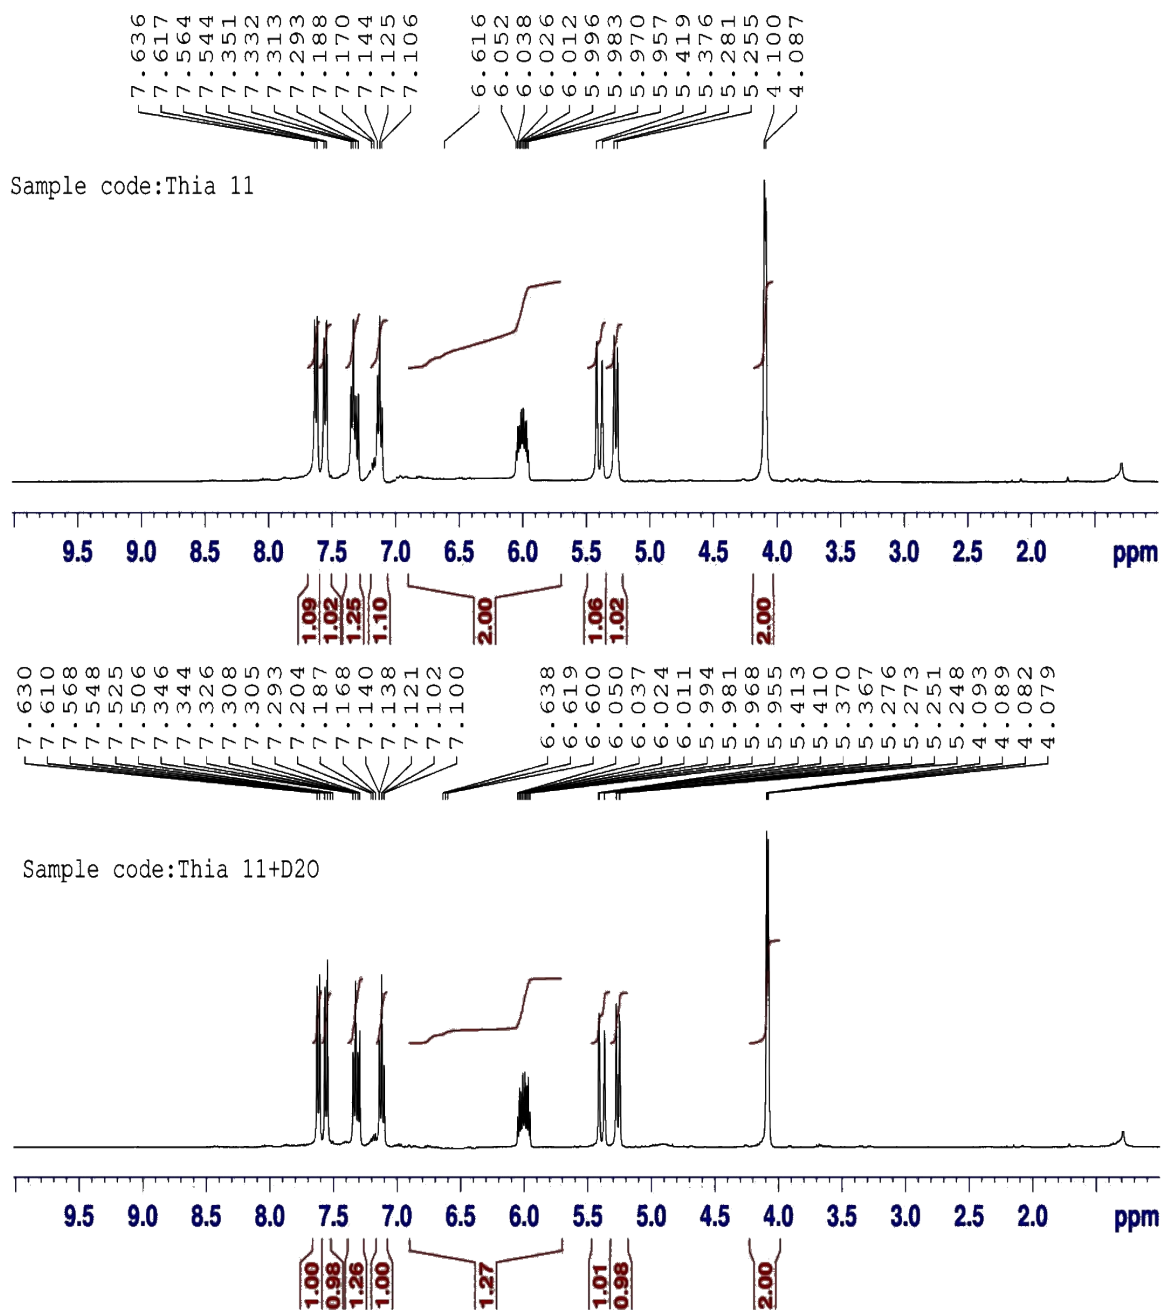

Figure S38. <sup>1</sup>H-NMR spectra of *N*-allylbenzo[d]thiazol-2-amine in CDCl<sub>3</sub> (D<sub>2</sub>O as exchanged solvent is used)

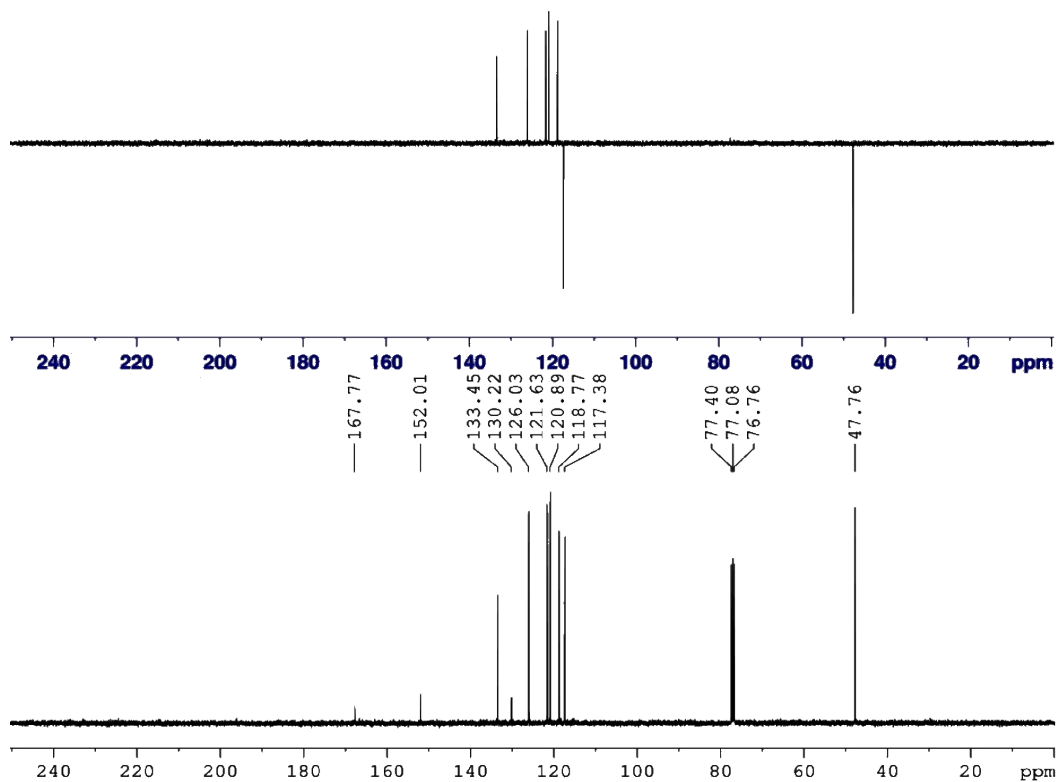

Figure S39.  $^{13}\text{C}$ -NMR and DEPT 135 spectra of *N*-allylbenzo[*d*]thiazol-2-amine in  $\text{CDCl}_3$

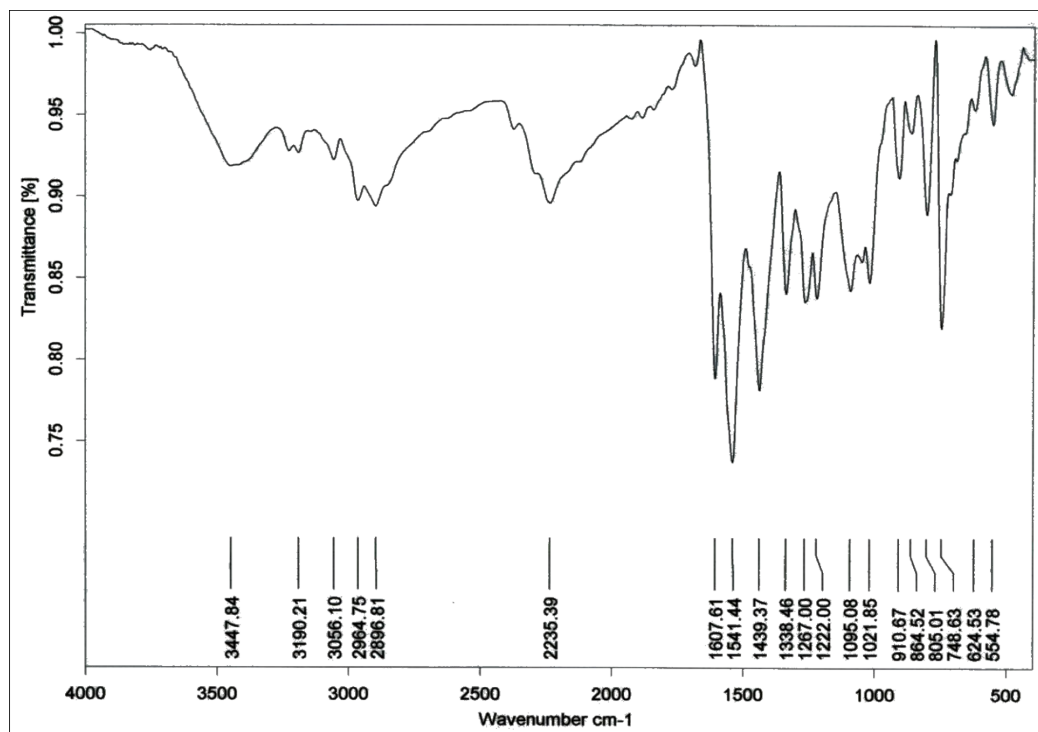

Figure S40. IR (KBr discs) spectrum of *N*-allylbenzo[*d*]thiazol-2-amine



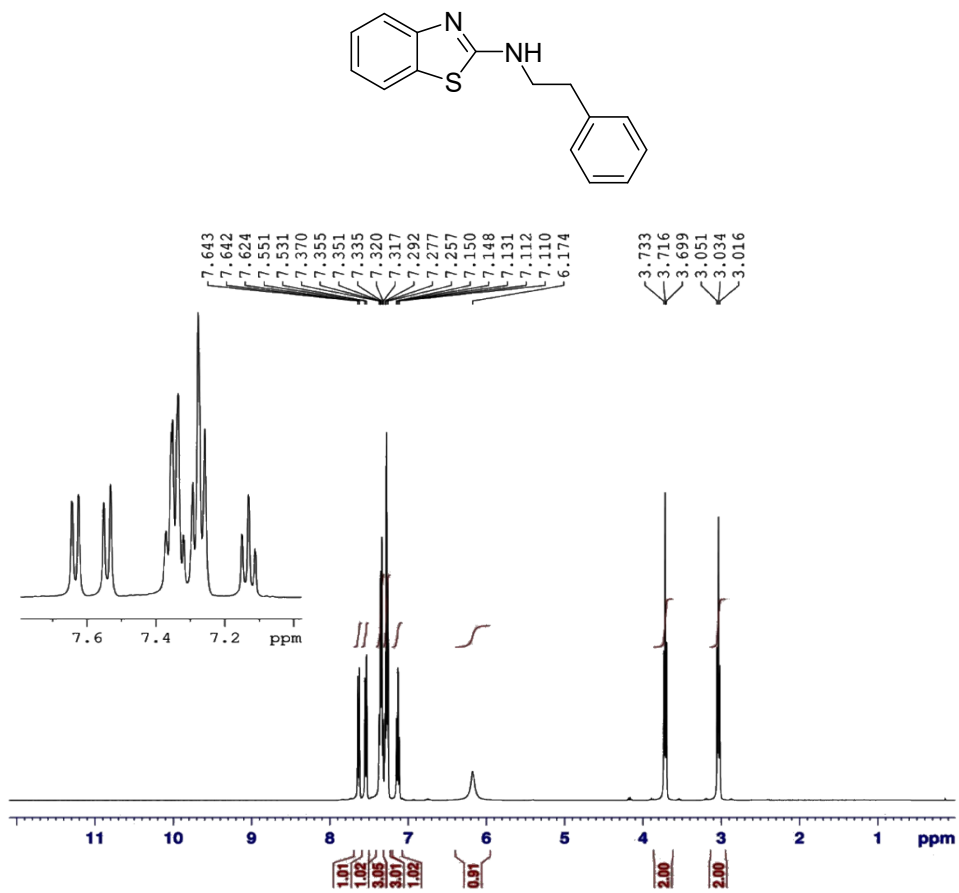

Figure S41. <sup>1</sup>H-NMR spectrum of *N*-phenethylbenzo[*d*]thiazol-2-amine in CDCl<sub>3</sub>

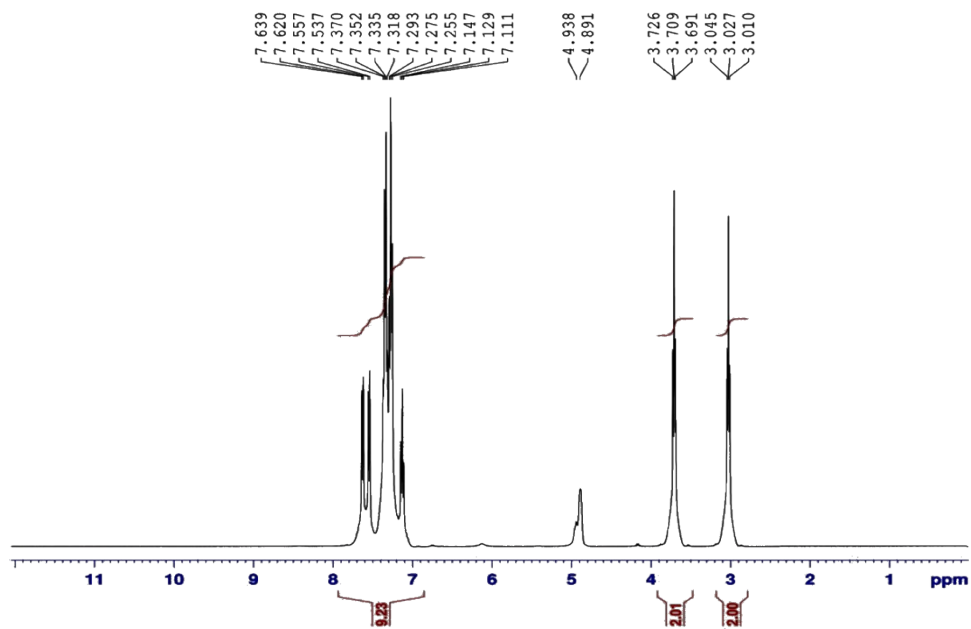

Figure S42. <sup>1</sup>H-NMR spectrum of *N*-phenethylbenzo[*d*]thiazol-2-amine in CDCl<sub>3</sub> (D<sub>2</sub>O as exchanged solvent is used)

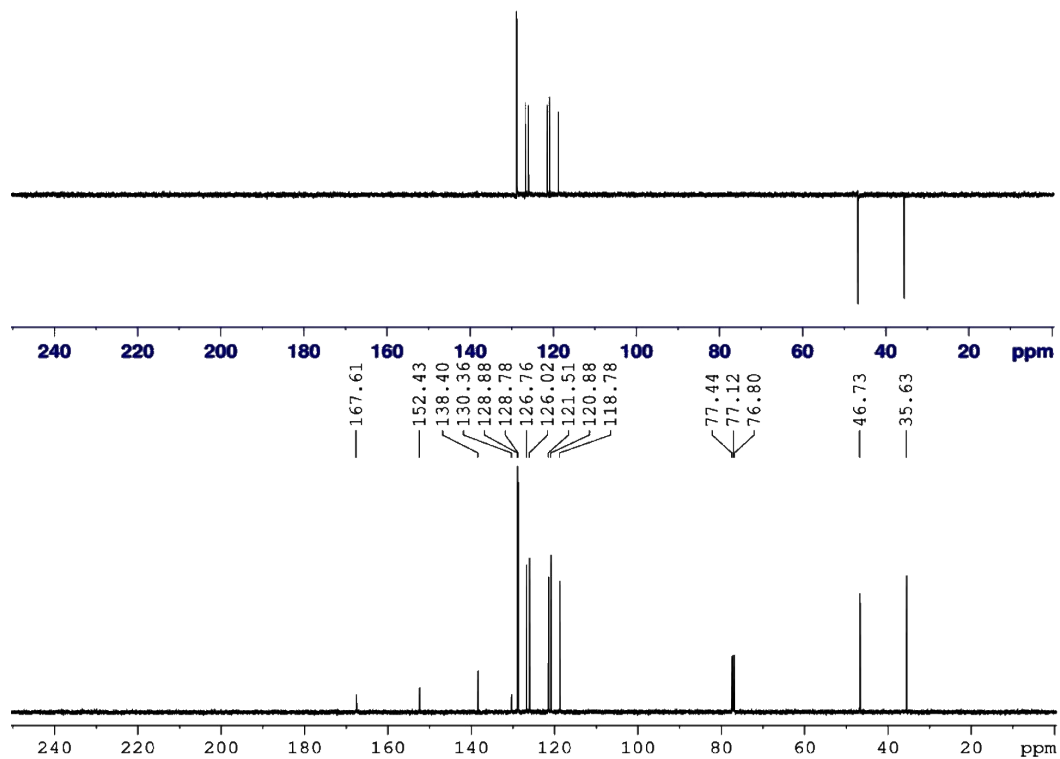

Figure S43.  $^{13}\text{C}$ -NMR and DEPT 135 spectra of *N*-phenethylbenzo[*d*]thiazol-2-amine in  $\text{CDCl}_3$

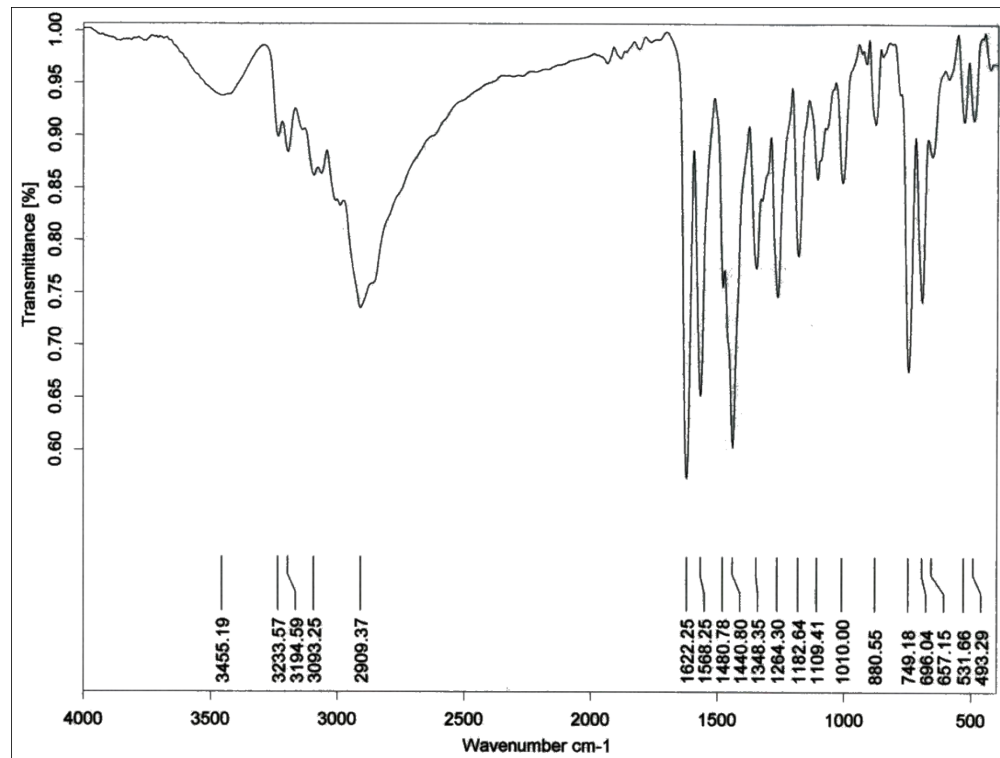

Figure S44. IR (KBr discs) spectrum of *N*-phenethylbenzo[*d*]thiazol-2-amine

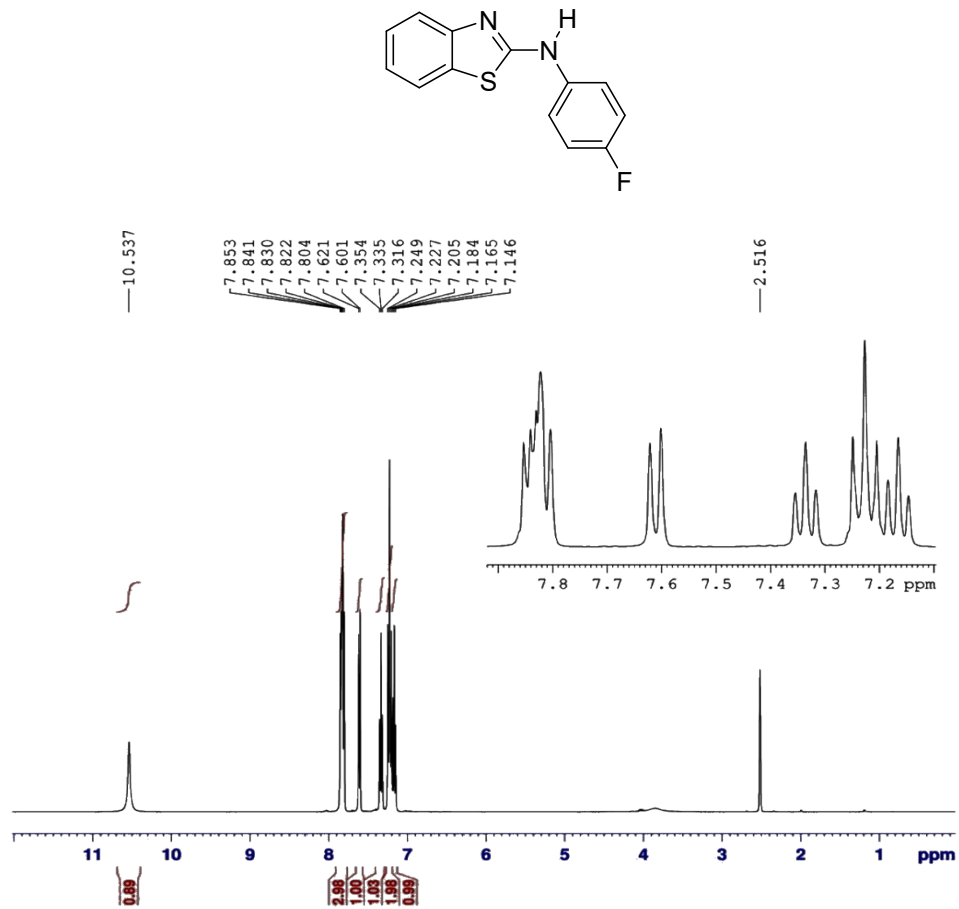

Figure S45.  $^1\text{H-NMR}$  spectrum of *N*-(4-fluorophenyl)benzo[d]thiazol-2-amine in  $\text{CDCl}_3$

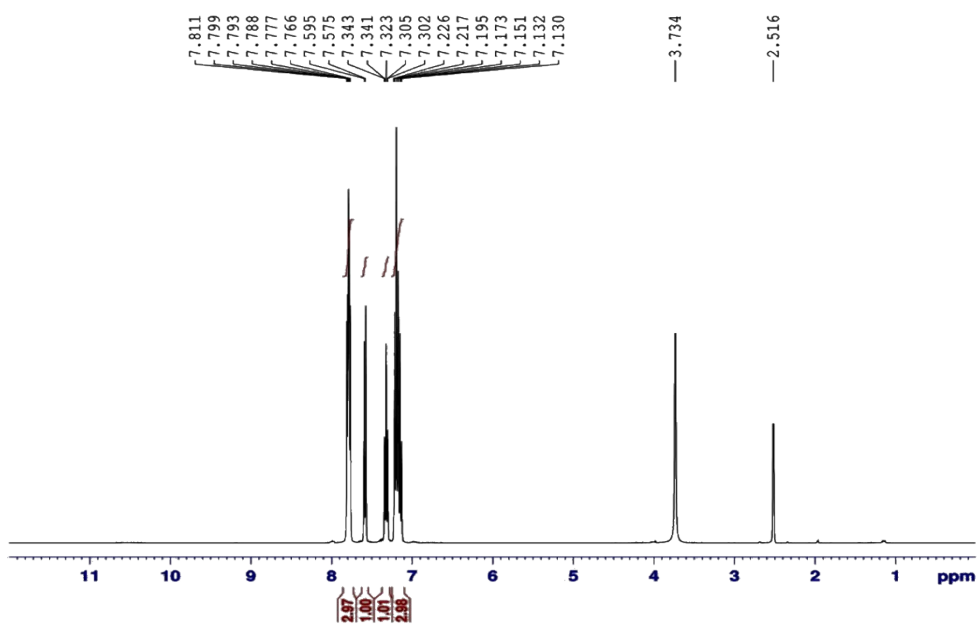

Figure S46.  $^1\text{H-NMR}$  spectrum of *N*-(4-fluorophenyl)benzo[d]thiazol-2-amine in  $\text{CDCl}_3$  ( $\text{D}_2\text{O}$  as exchanged solvent is used)

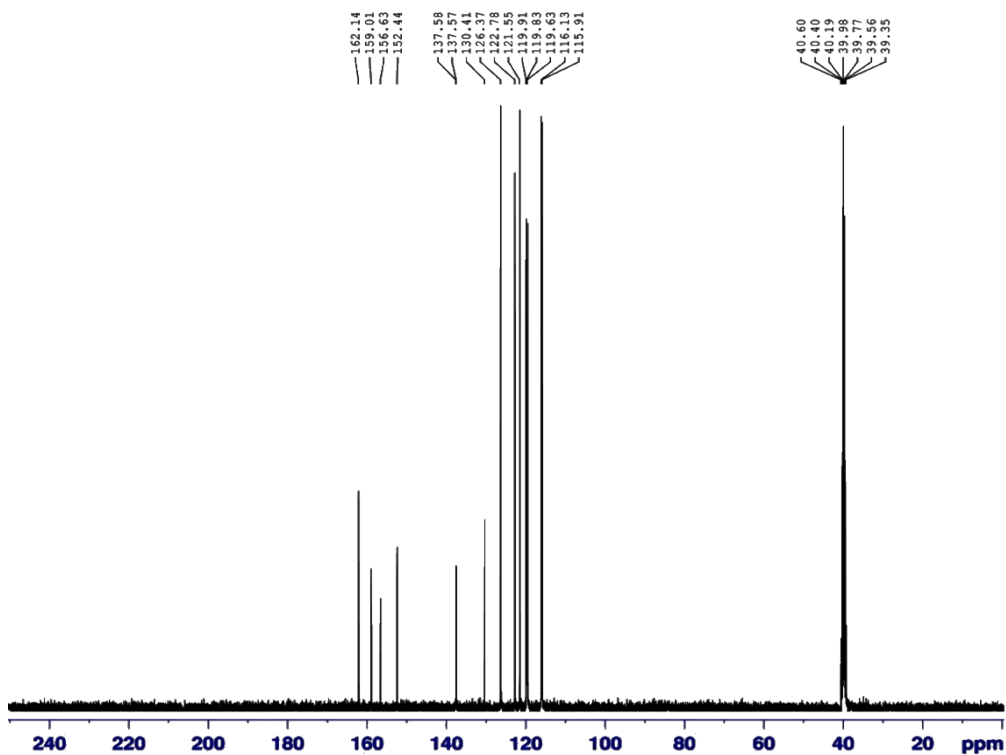

Figure S47.  $^{13}\text{C}$ -NMR spectrum of *N*-(4-fluorophenyl)benzo[d]thiazol-2-amine in  $\text{CDCl}_3$

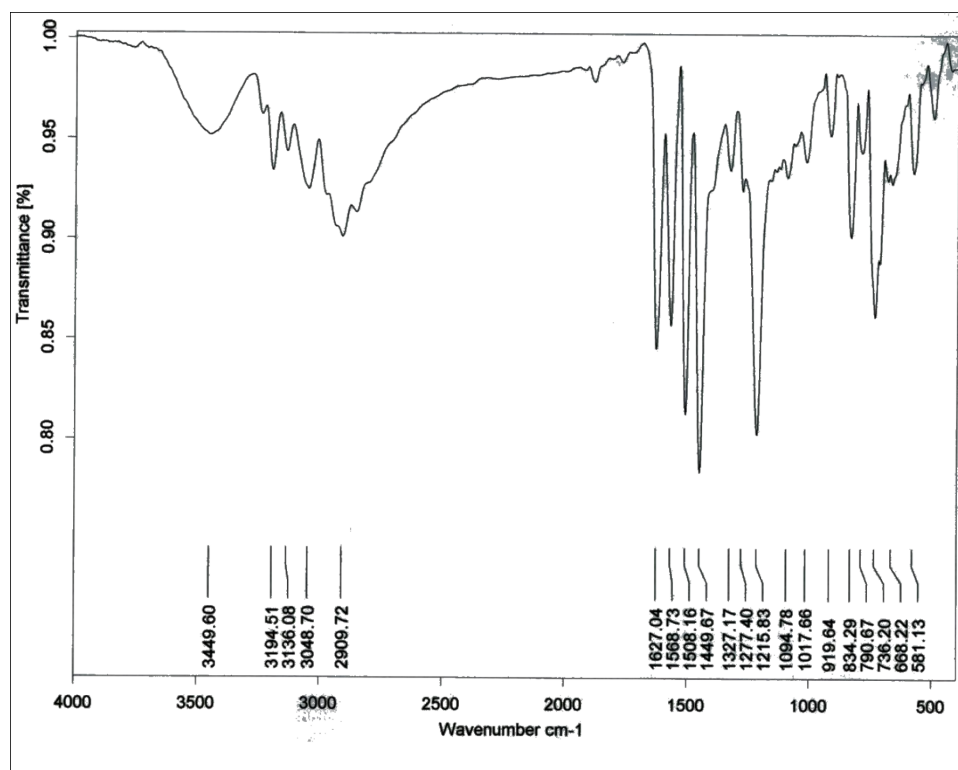

Figure S48. IR (KBr discs) spectrum of *N*-(4-fluorophenyl)benzo[d]thiazol-2-amine

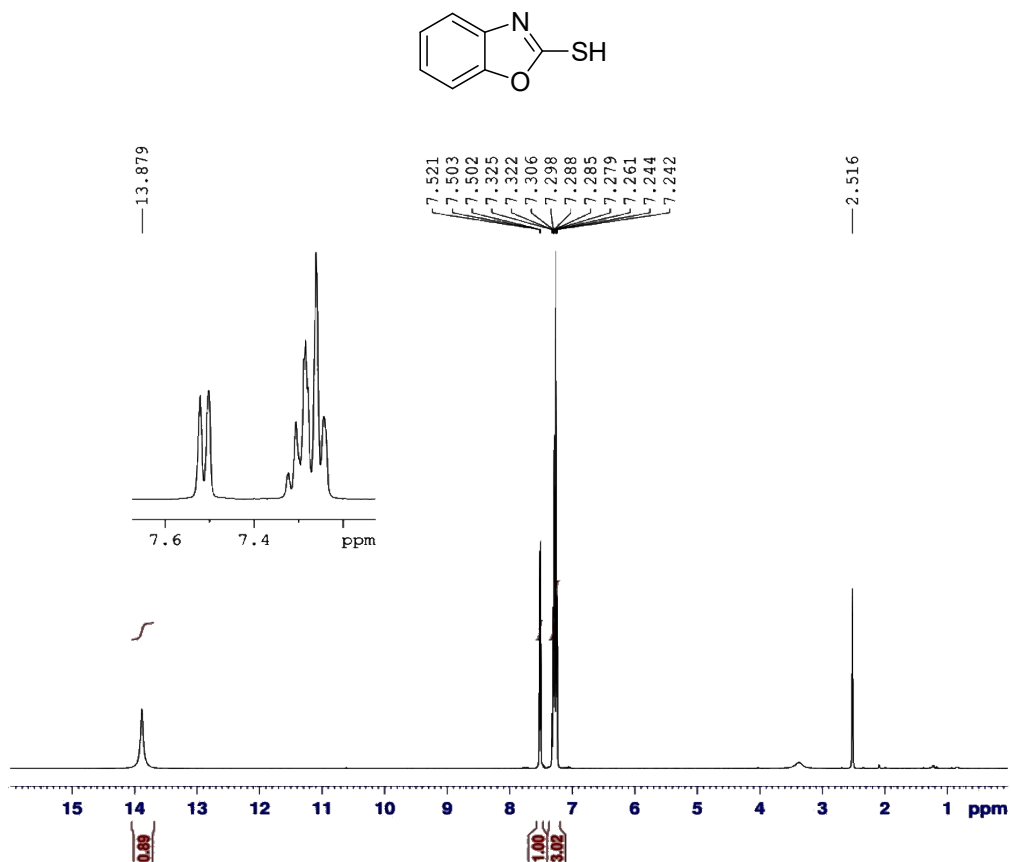

Figure S49. <sup>1</sup>H-NMR spectrum of 2-mercaptobenzoxazole in DMSO

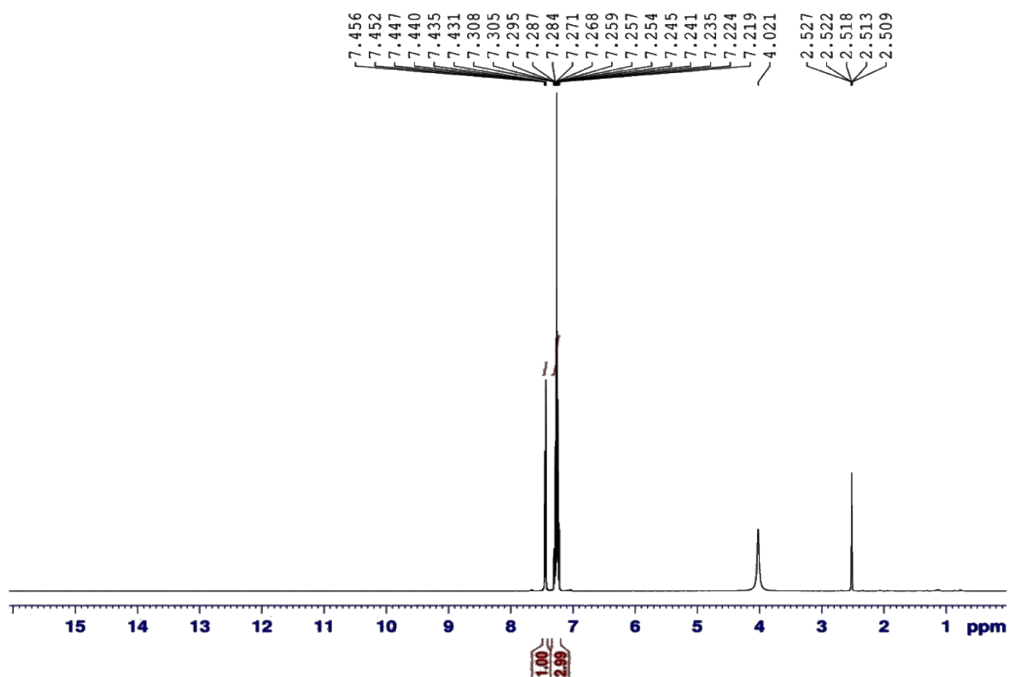

Figure S50. <sup>1</sup>H-NMR spectrum of 2-mercaptobenzoxazole in DMSO (D<sub>2</sub>O as exchanged solvent is used)

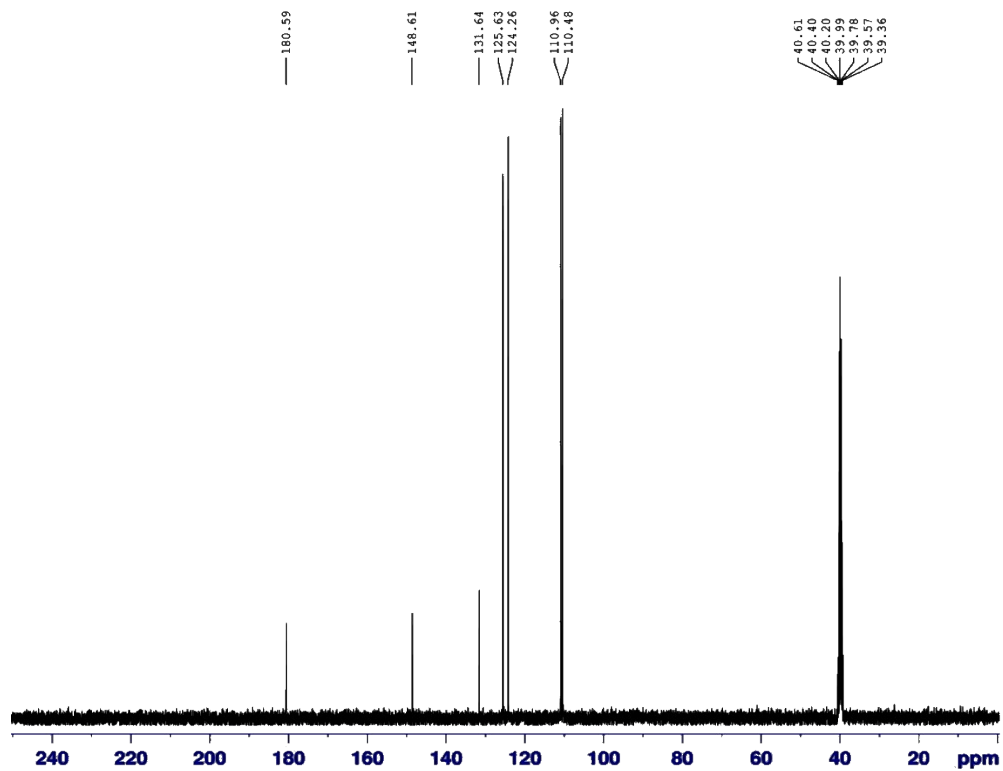

Figure S51.  $^{13}\text{C}$ -NMR spectrum of 2-mercaptobenzoxazole in DMSO

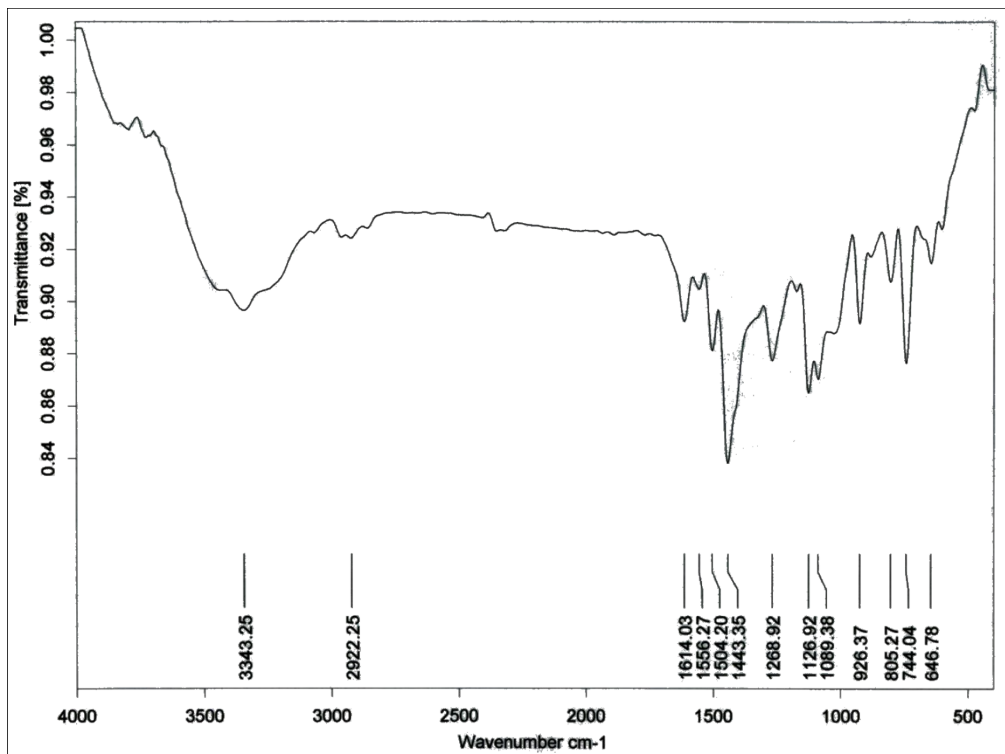

Figure S52. IR (KBr discs) spectrum of 2-mercaptobenzoxazole

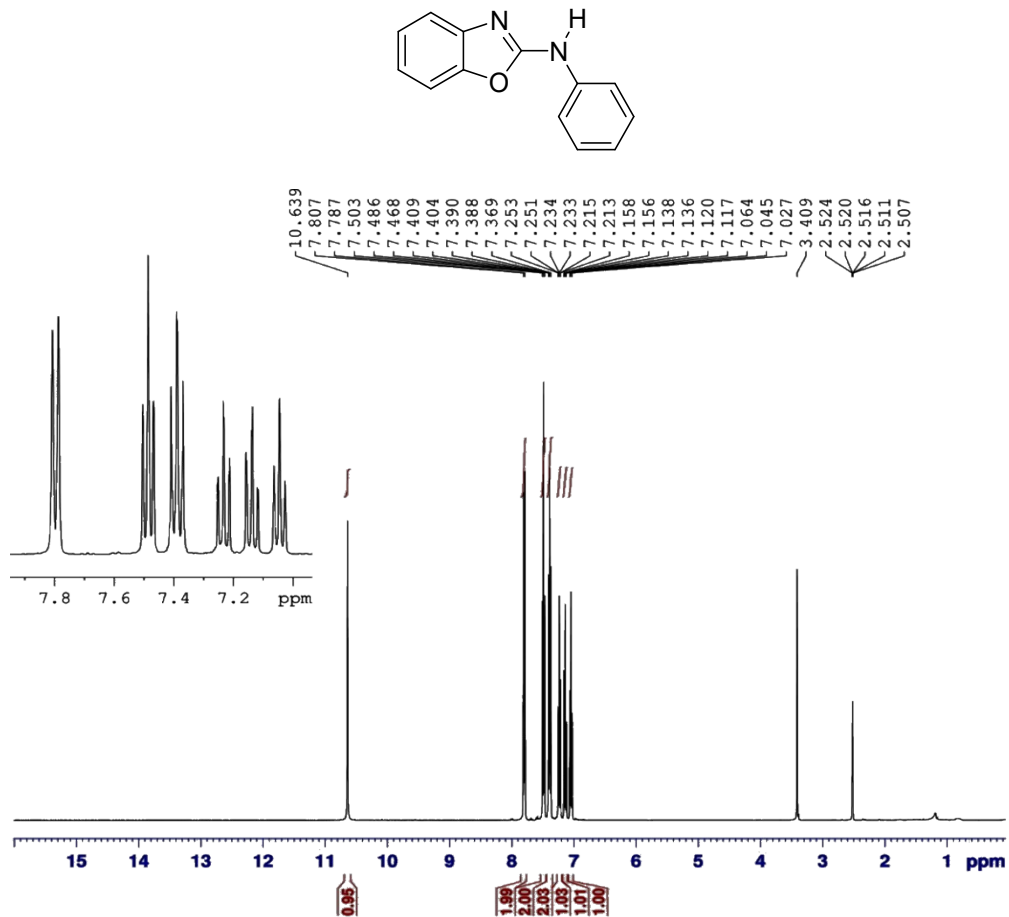

Figure S53.  $^1\text{H-NMR}$  spectrum of *N*-phenylbenzo[d]oxazol-2-amine in DMSO

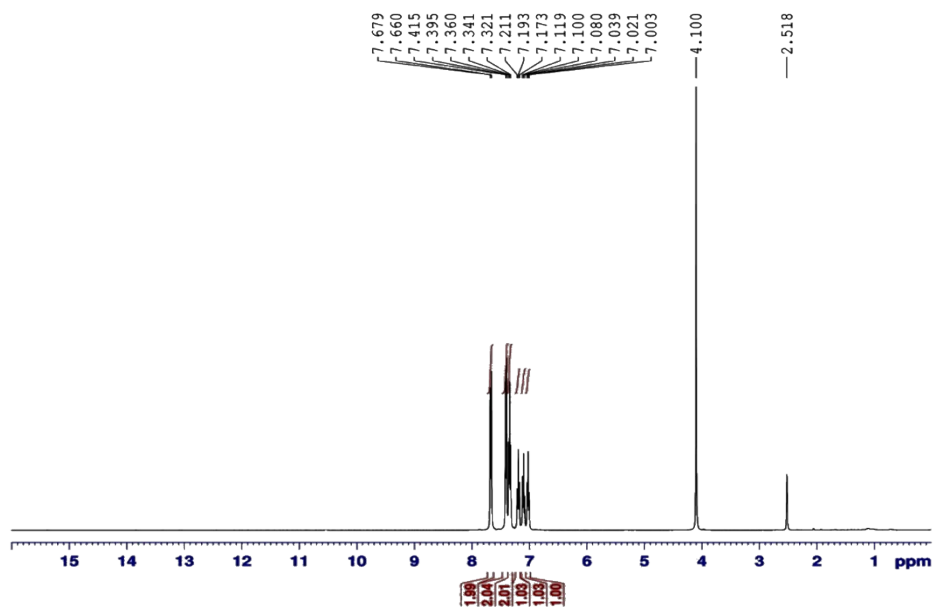

Figure S54.  $^1\text{H-NMR}$  spectrum of *N*-phenylbenzo[d]oxazol-2-amine in DMSO ( $\text{D}_2\text{O}$  as exchanged solvent is used)

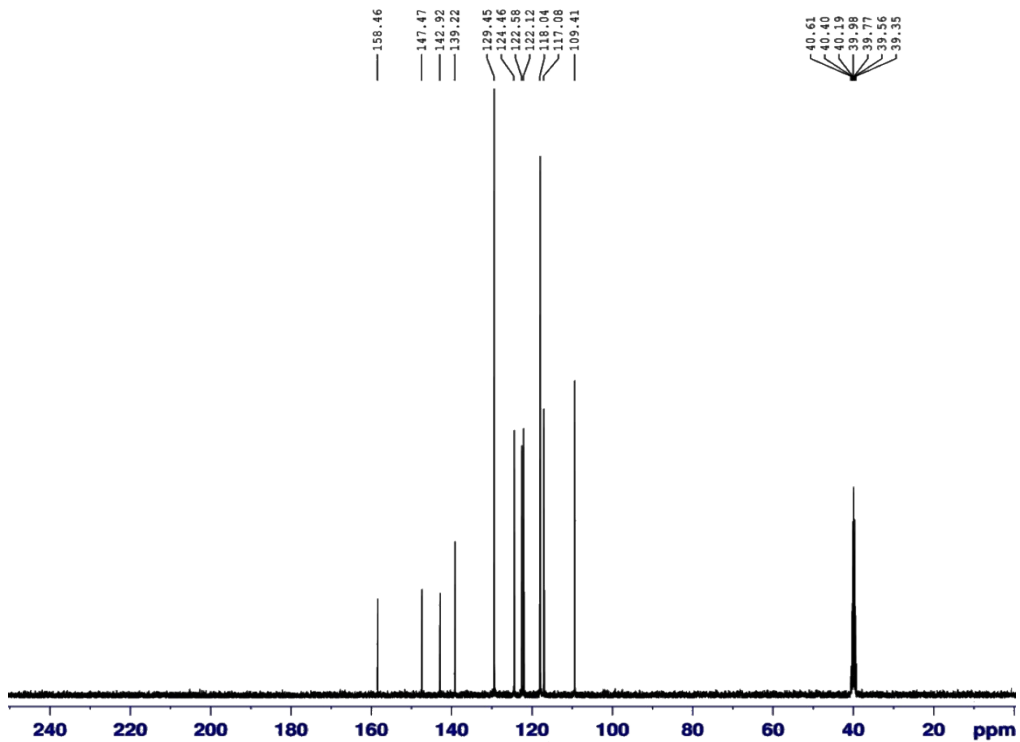

Figure S55.  $^{13}\text{C}$ -NMR spectrum of *N*-phenylbenzo[d]oxazol-2-amine in DMSO

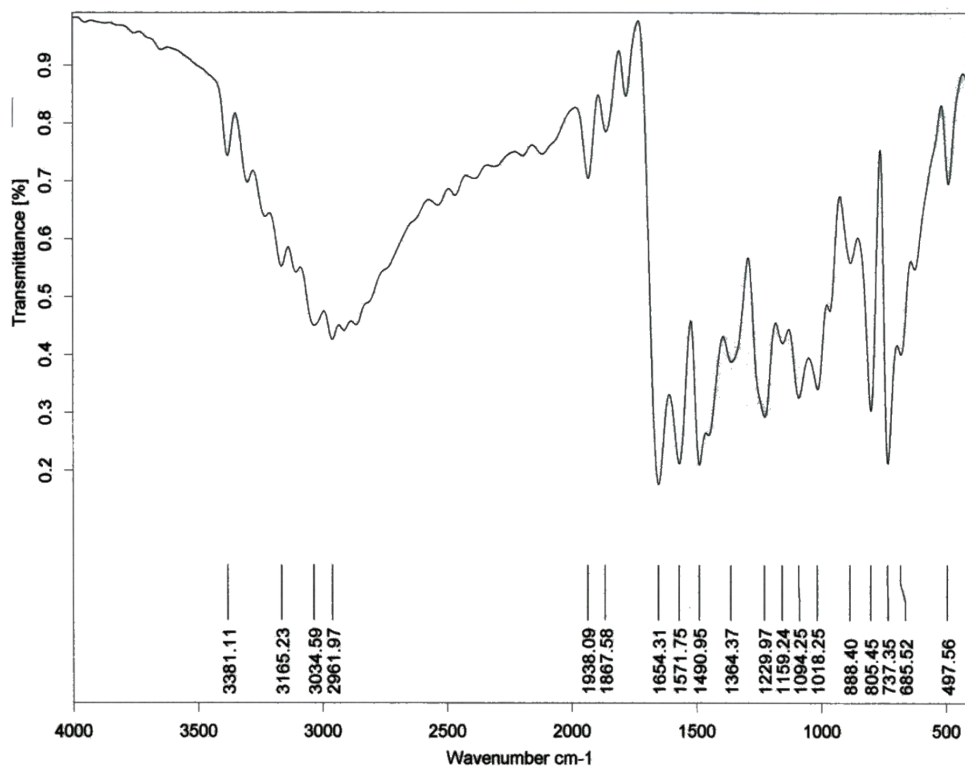

Figure S56. IR (KBr discs) spectrum of *N*-phenylbenzo[d]oxazol-2-amine



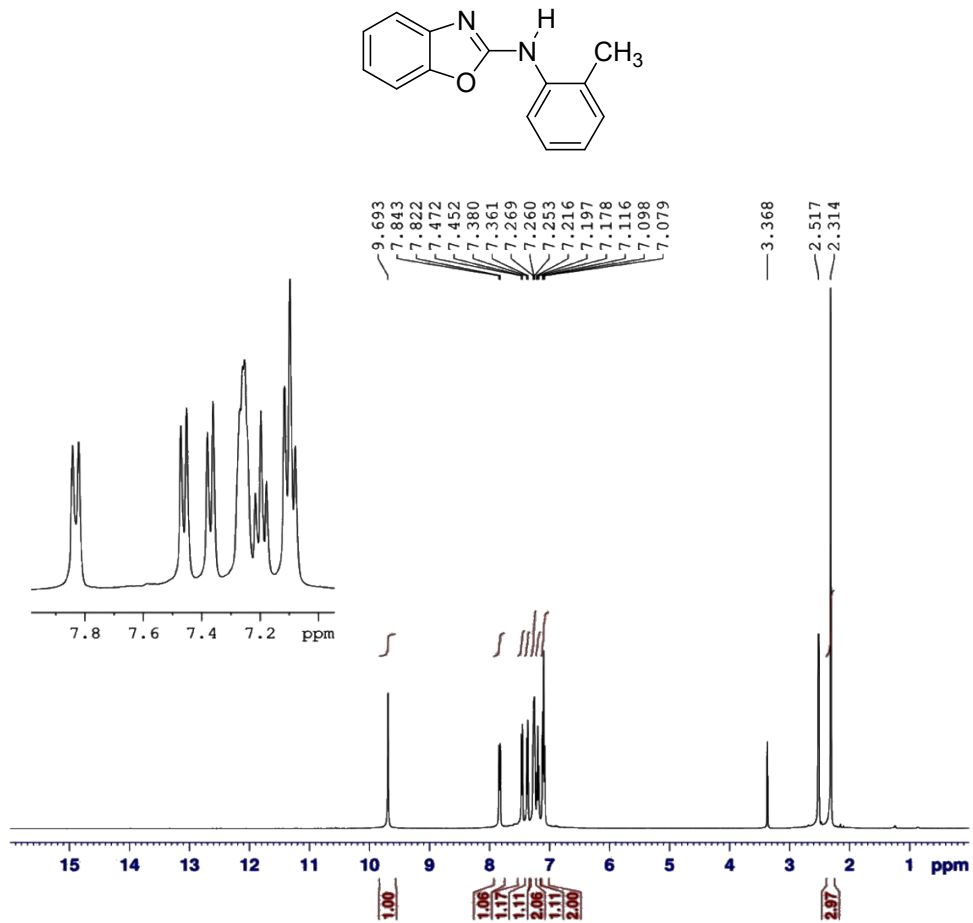

Figure S57.  $^1\text{H-NMR}$  spectrum of *N*-*o*-tolylbenzo[*d*]oxazol-2-amine in DMSO

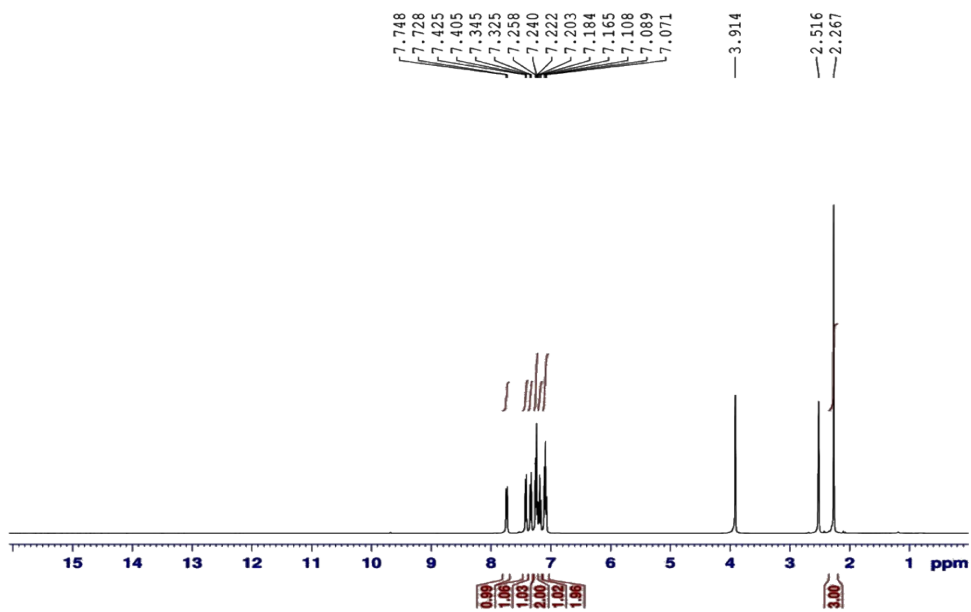

Figure S58.  $^1\text{H-NMR}$  spectrum of *N*-*o*-tolylbenzo[*d*]oxazol-2-amine in DMSO ( $\text{D}_2\text{O}$  as exchanged solvent is used)

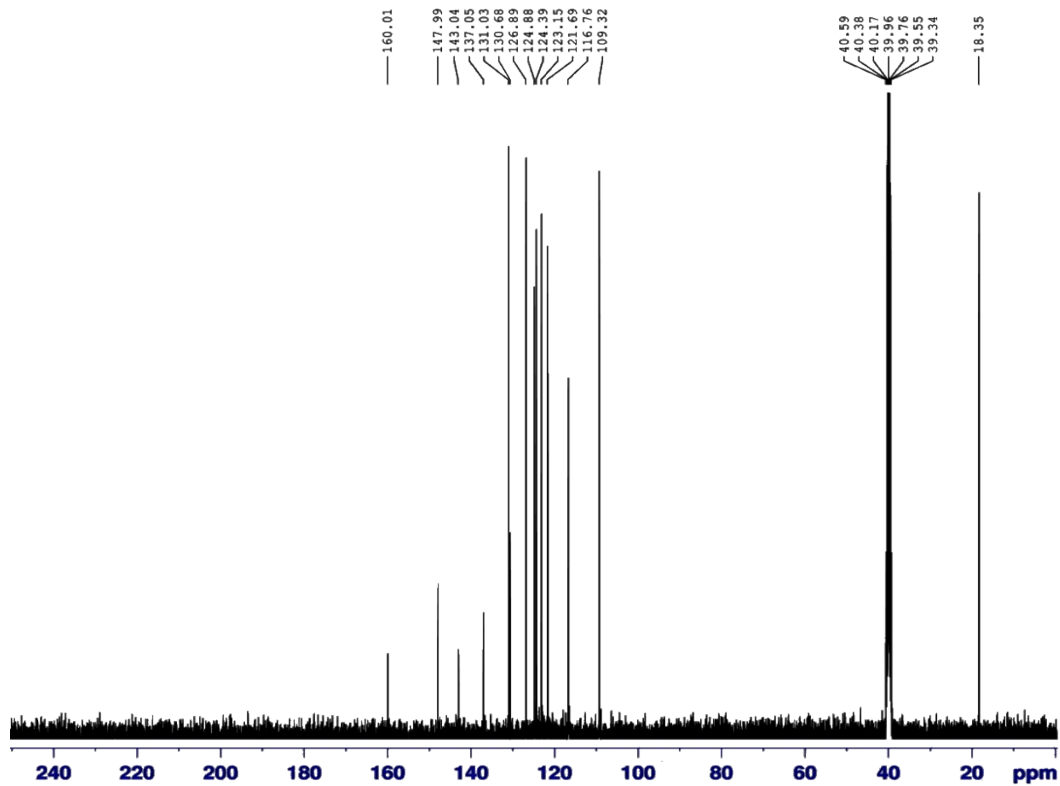

Figure S59.  $^{13}\text{C}$ -NMR spectrum of *N*-*o*-tolylbenzo[*d*]oxazol-2-amine in DMSO

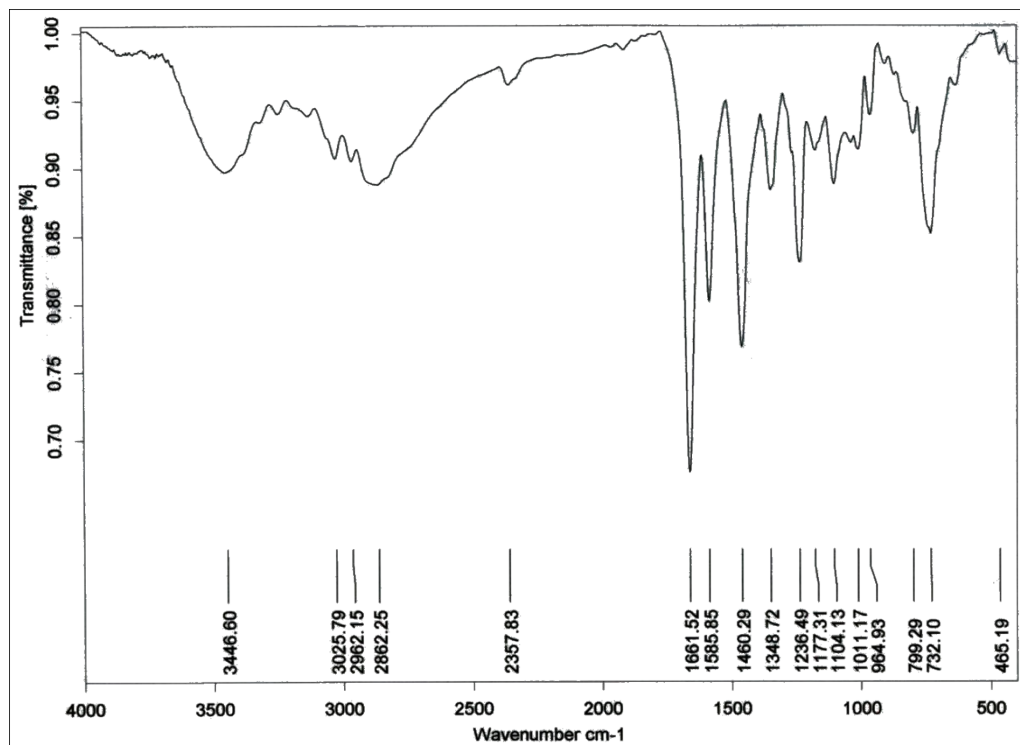

Figure S60. IR (KBr discs) spectrum of *N*-*o*-tolylbenzo[*d*]oxazol-2-amine

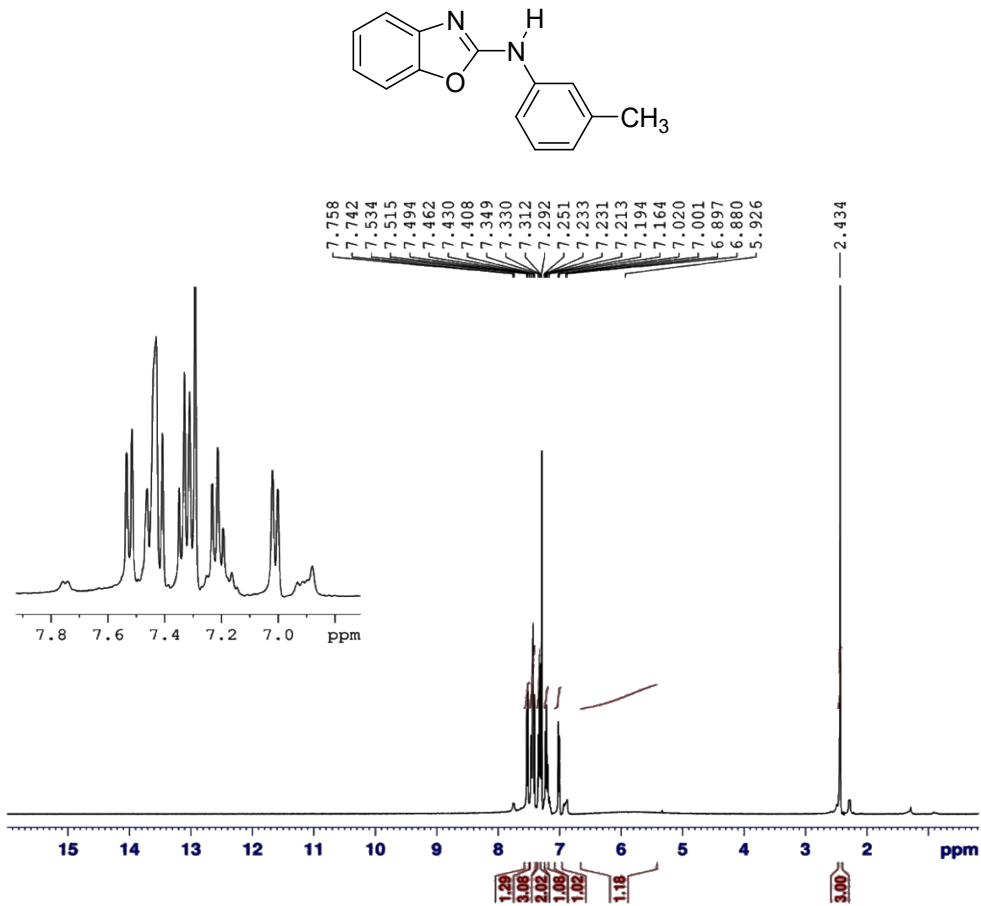

Figure S61. <sup>1</sup>H-NMR spectrum of *N*-*m*-tolylbenzo[*d*]oxazol-2-amine in CDCl<sub>3</sub>

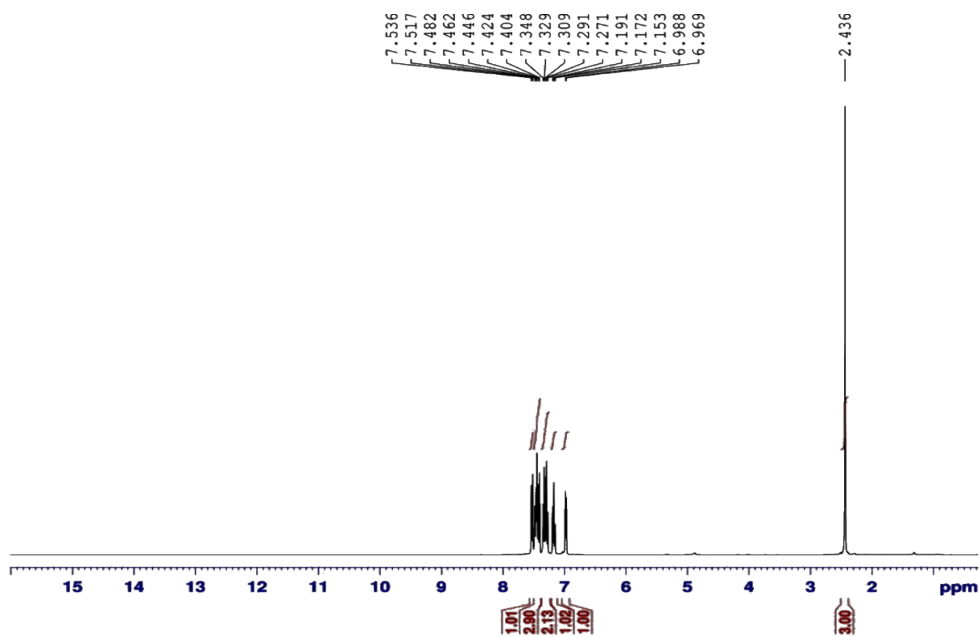

Figure S62. <sup>1</sup>H-NMR spectrum of *N*-*m*-tolylbenzo[*d*]oxazol-2-amine in CDCl<sub>3</sub> (D<sub>2</sub>O as exchanged solvent is used)

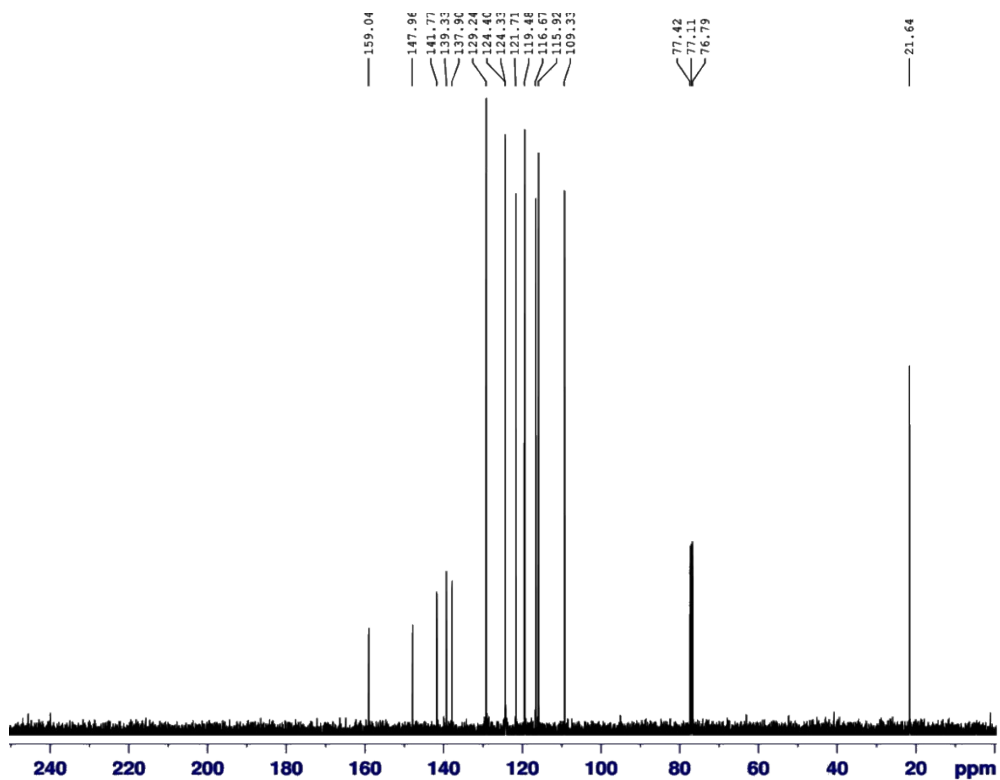

Figure S63.  $^{13}\text{C}$ -NMR spectrum of *N*-*m*-tolylbenzo[*d*]oxazol-2-amine in  $\text{CDCl}_3$

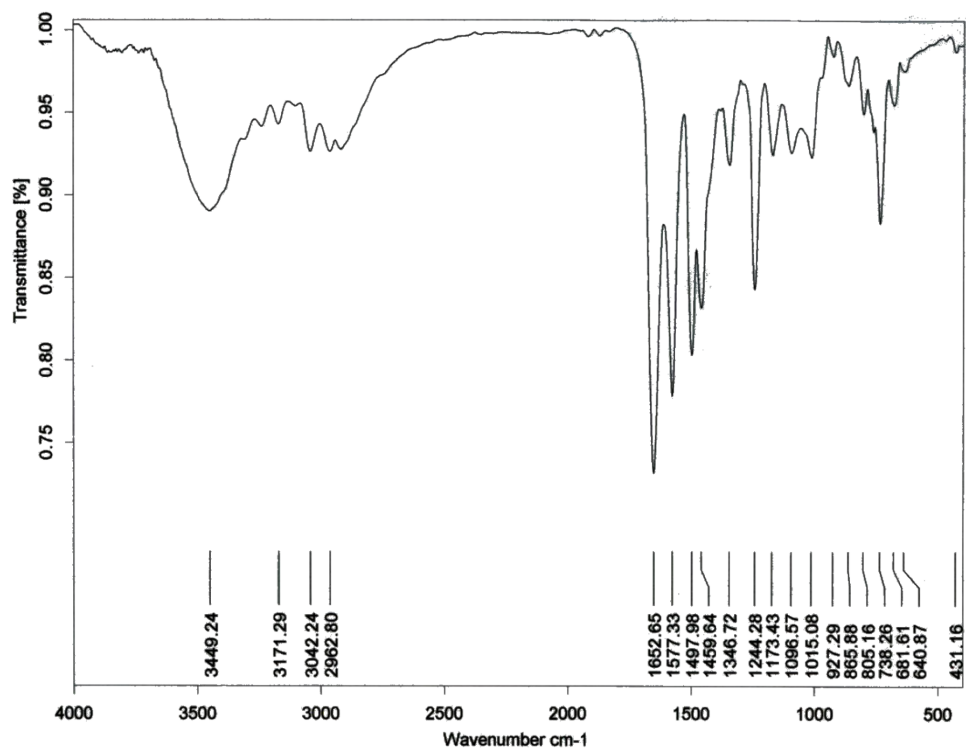

Figure S64. IR (KBr discs) spectrum of *N*-*m*-tolylbenzo[*d*]oxazol-2-amine

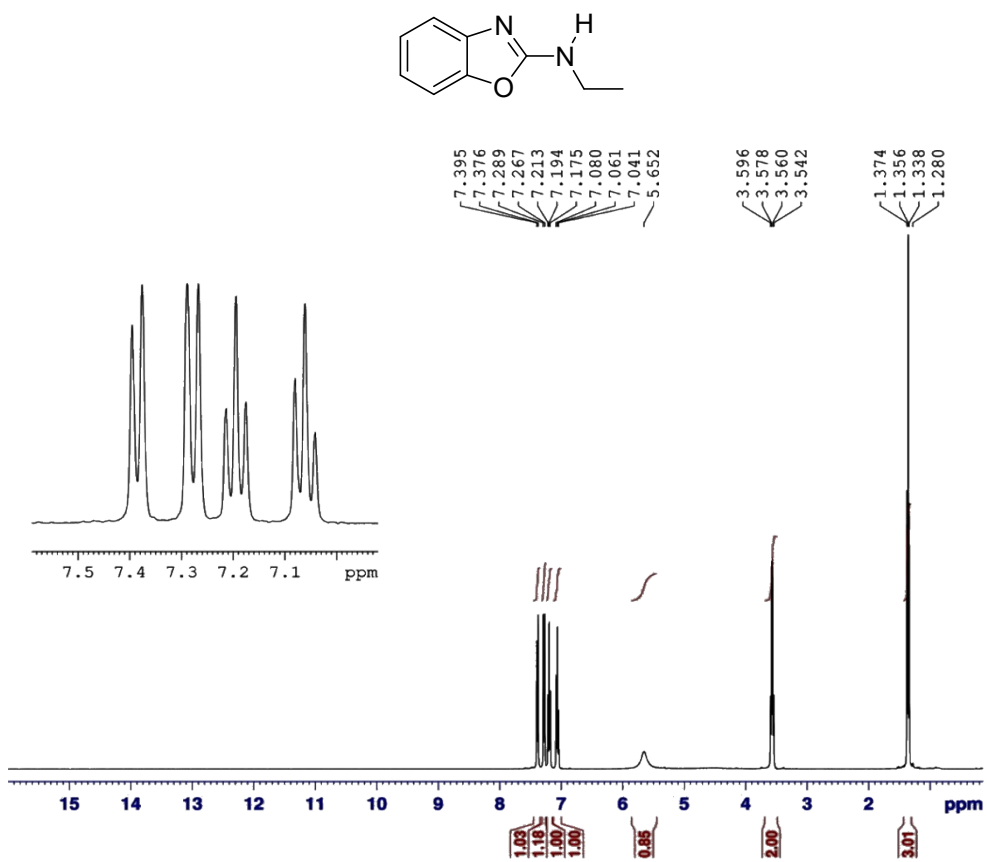

Figure S65.  $^1\text{H-NMR}$  spectrum of *N*-ethylbenzo[d]oxazol-2-amine in  $\text{CDCl}_3$

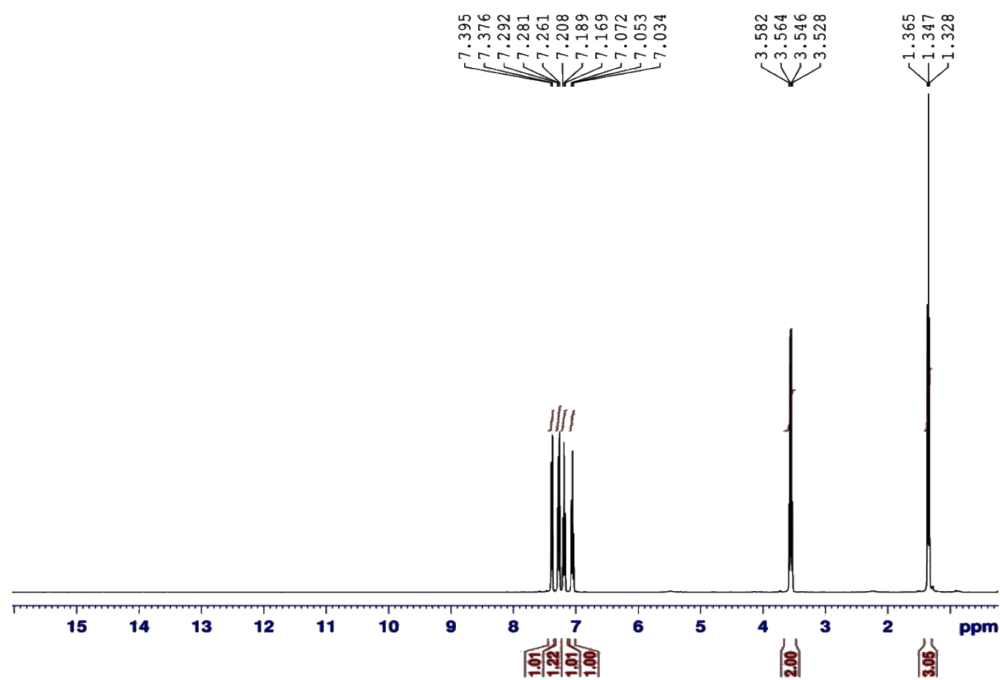

Figure S66.  $^1\text{H-NMR}$  spectrum of *N*-ethylbenzo[d]oxazol-2-amine in  $\text{CDCl}_3$  ( $\text{D}_2\text{O}$  as exchanged solvent is used)

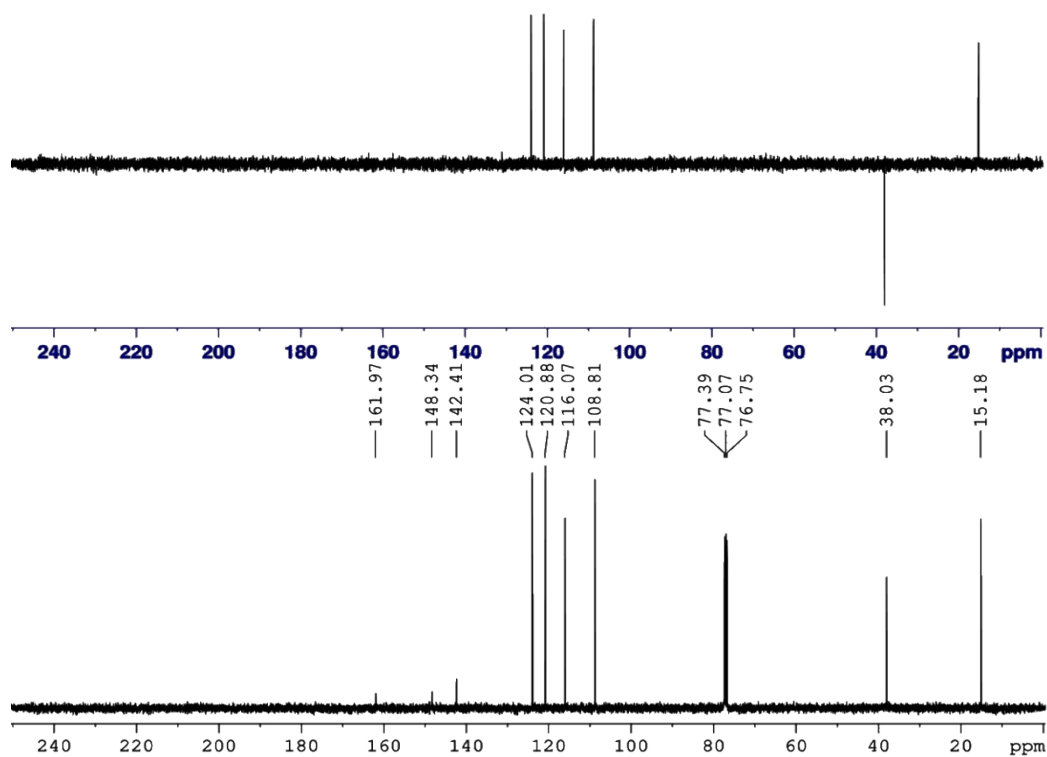

Figure S67.  $^{13}\text{C}$ -NMR and DEPT 135 spectra of *N*-ethylbenzo[*d*]oxazol-2-amine in  $\text{CDCl}_3$

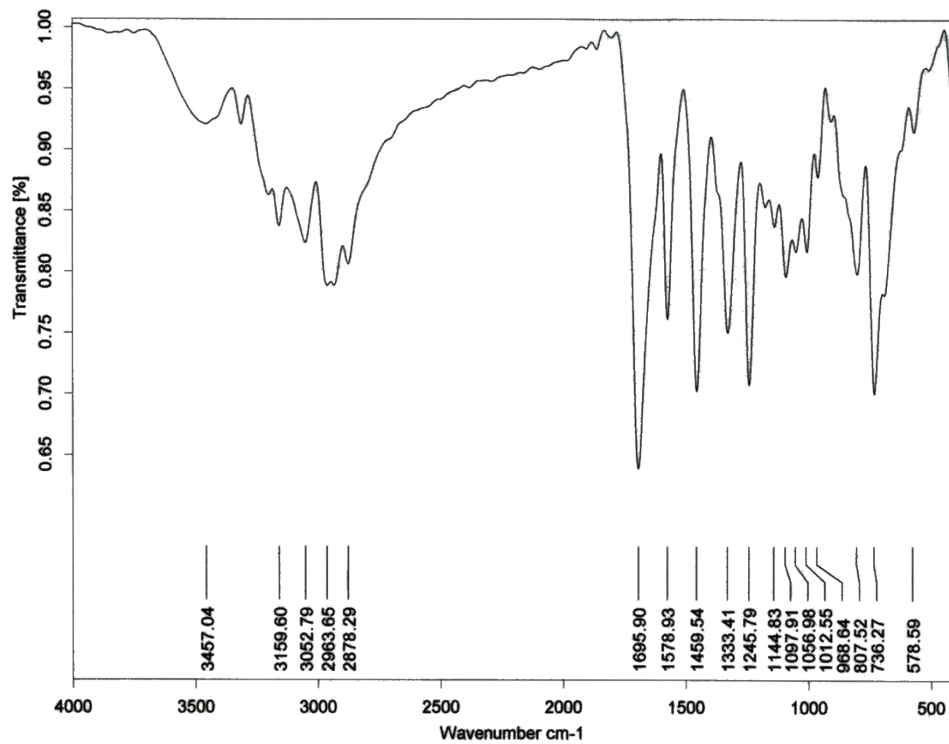

Figure S68. IR (KBr discs) spectrum of *N*-ethylbenzo[*d*]oxazol-2-amine

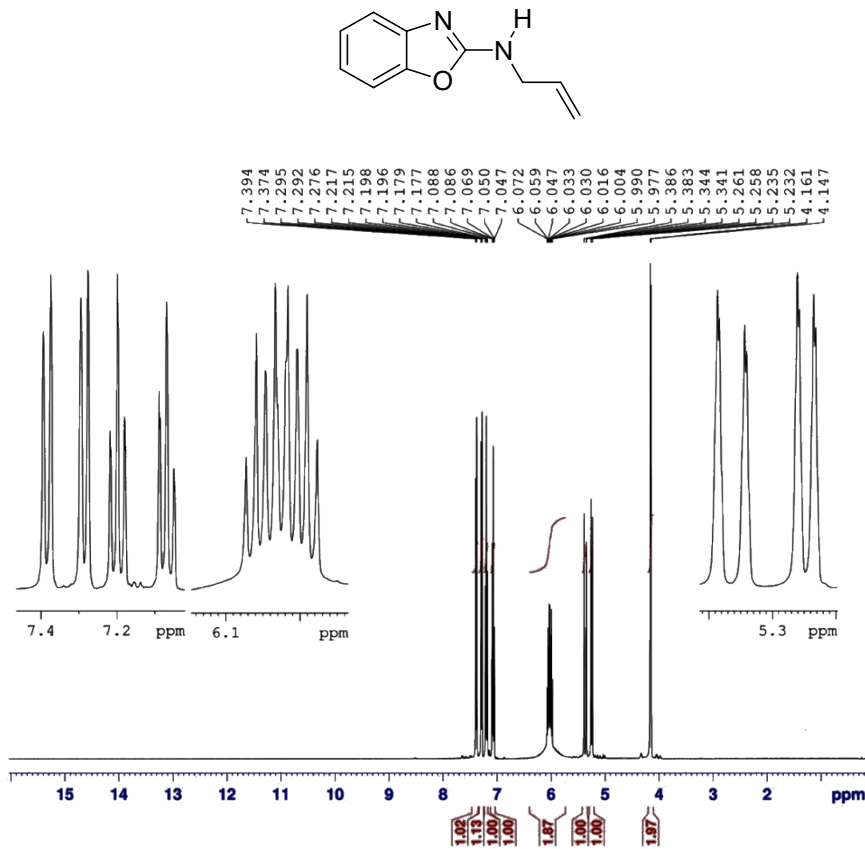

Figure S69. <sup>1</sup>H-NMR spectrum of *N*-allylbenzo[*d*]oxazol-2-amine in CDCl<sub>3</sub>

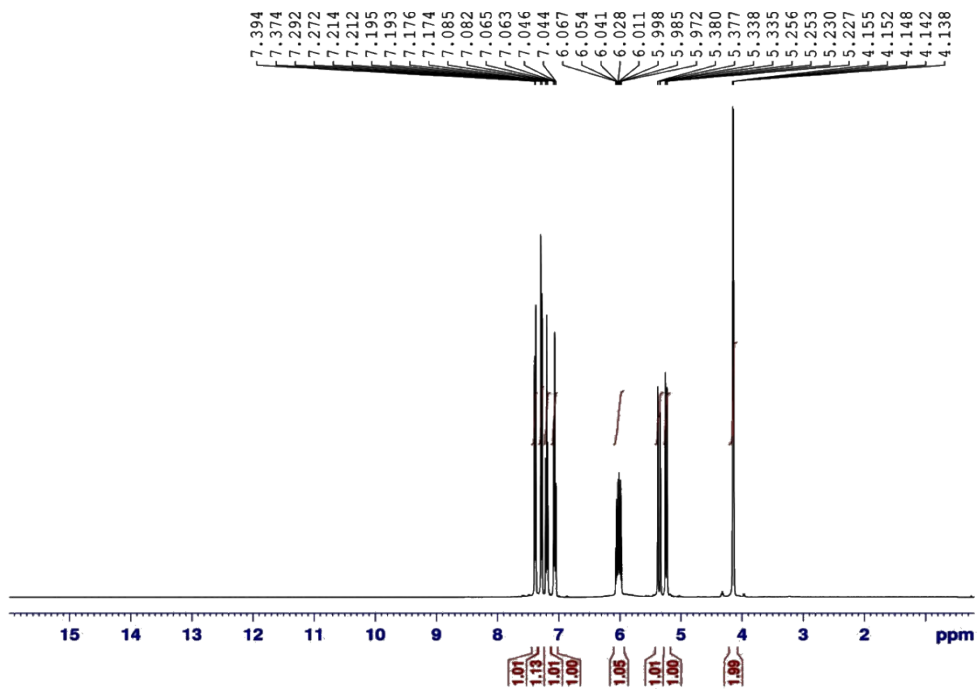

Figure S70. <sup>1</sup>H-NMR spectrum of *N*-allylbenzo[*d*]oxazol-2-amine in CDCl<sub>3</sub> (D<sub>2</sub>O as exchanged solvent is used)

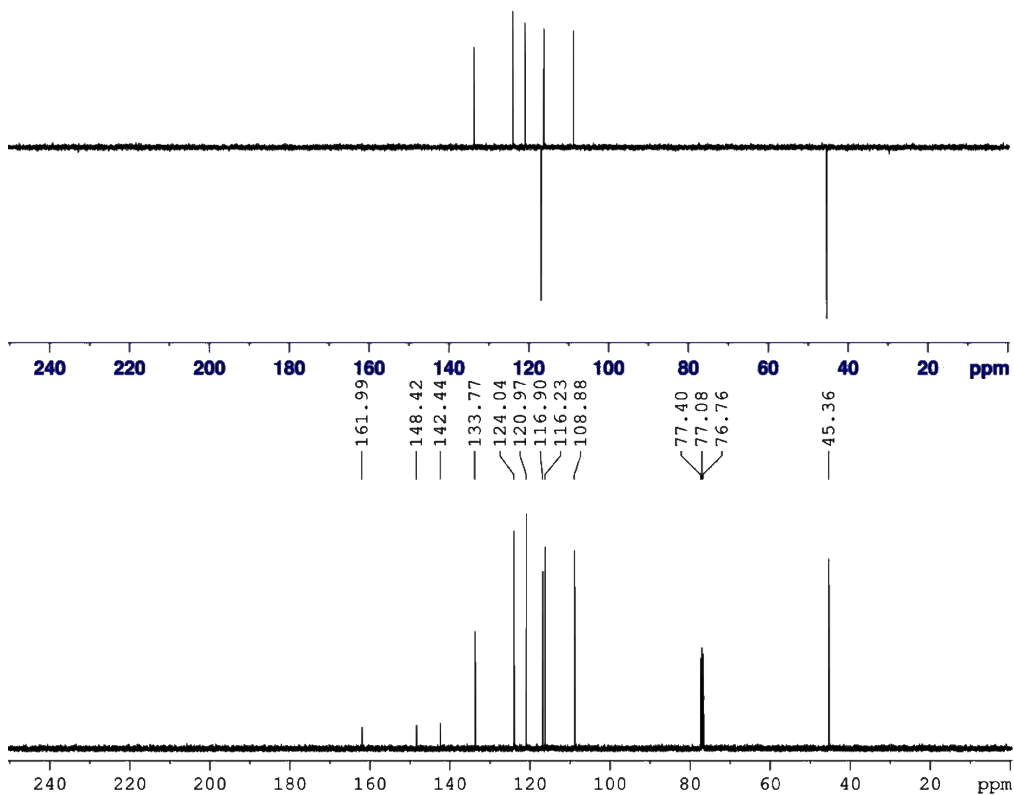

Figure S71. <sup>13</sup>C-NMR and DEPT 135 spectra of *N*-allylbenzo[*d*]oxazol-2-amine in CDCl<sub>3</sub>

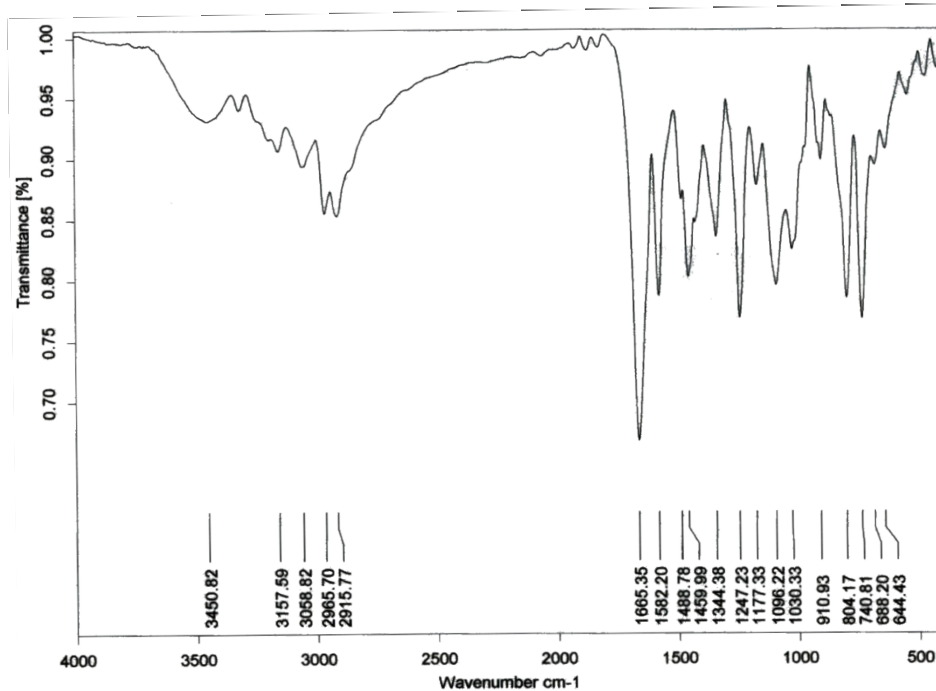

Figure S72. IR (KBr discs) spectrum of *N*-allylbenzo[*d*]oxazol-2-amine



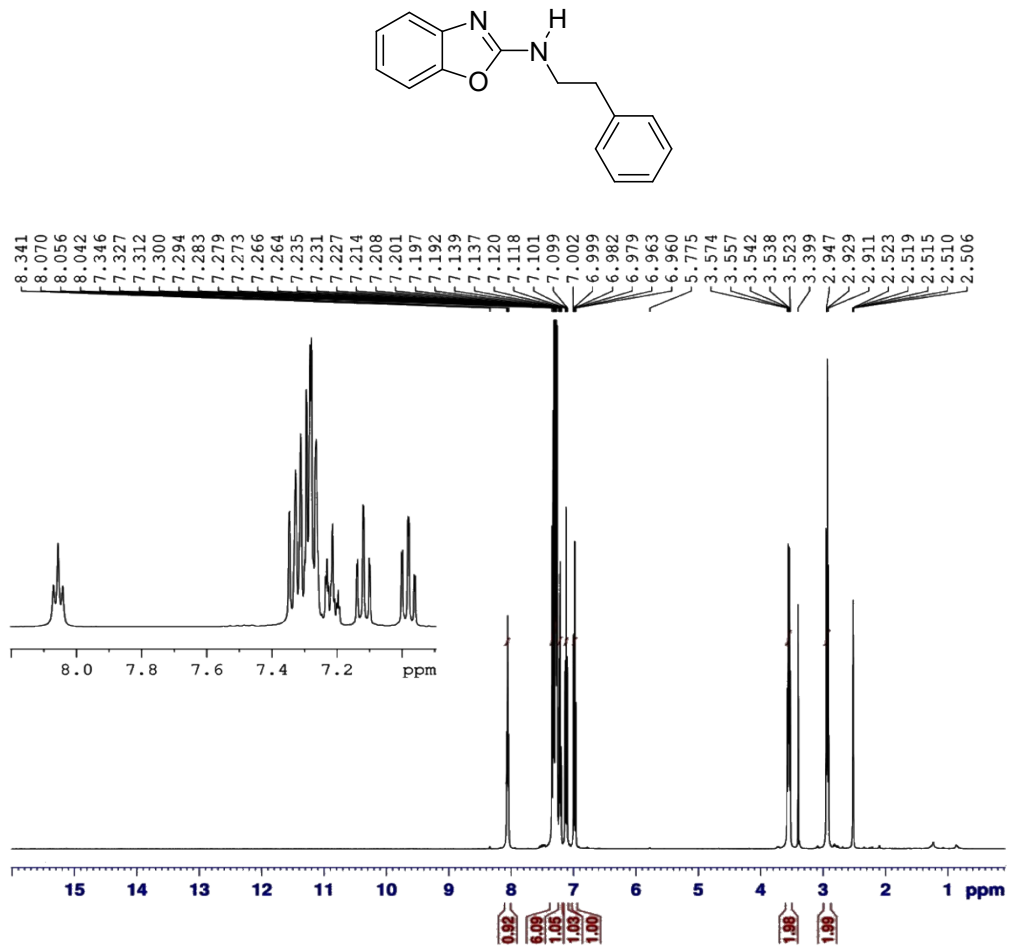

Figure S73. <sup>1</sup>H-NMR spectrum of *N*-phenethylbenzo[*d*]oxazol-2-amine in CDCl<sub>3</sub>

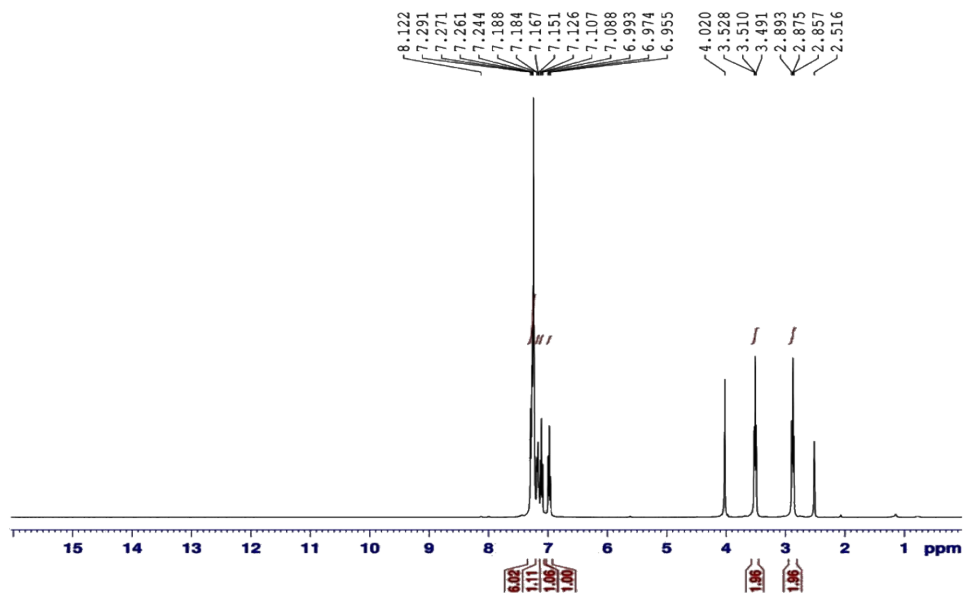

Figure S74. <sup>1</sup>H-NMR spectrum of *N*-phenethylbenzo[*d*]oxazol-2-amine in CDCl<sub>3</sub> (D<sub>2</sub>O as exchanged solvent is used)

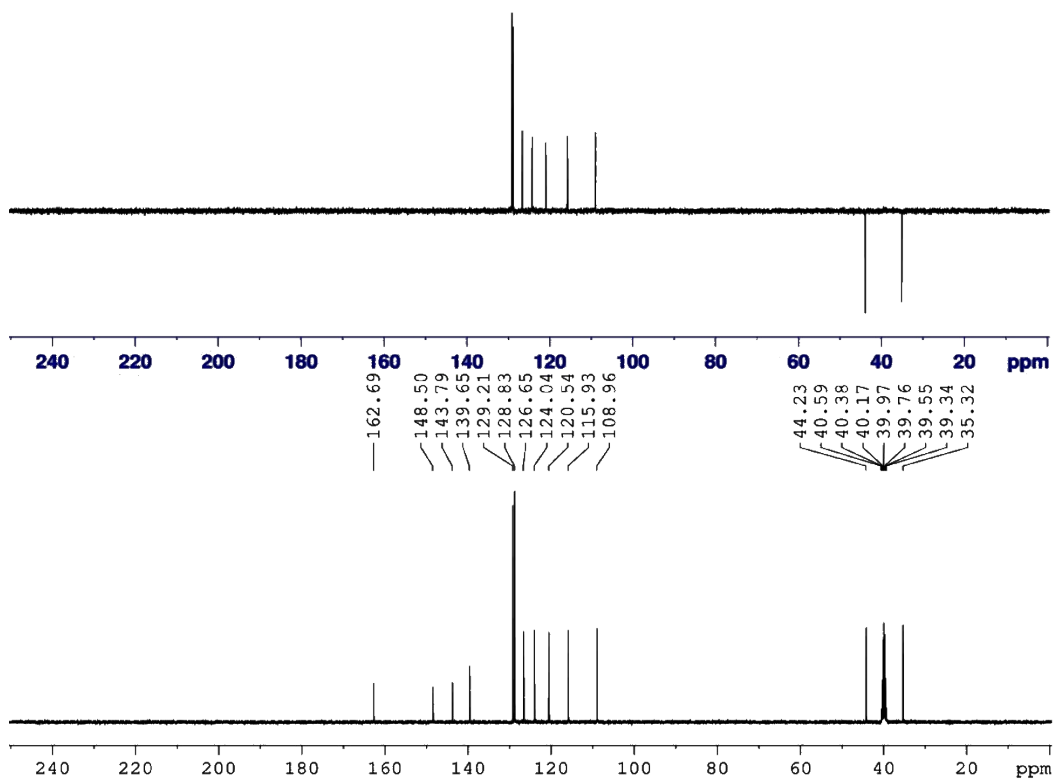

Figure S75.  $^{13}\text{C}$ -NMR and DEPT 135 spectra of *N*-phenethylbenzo[*d*]oxazol-2-amine in  $\text{CDCl}_3$

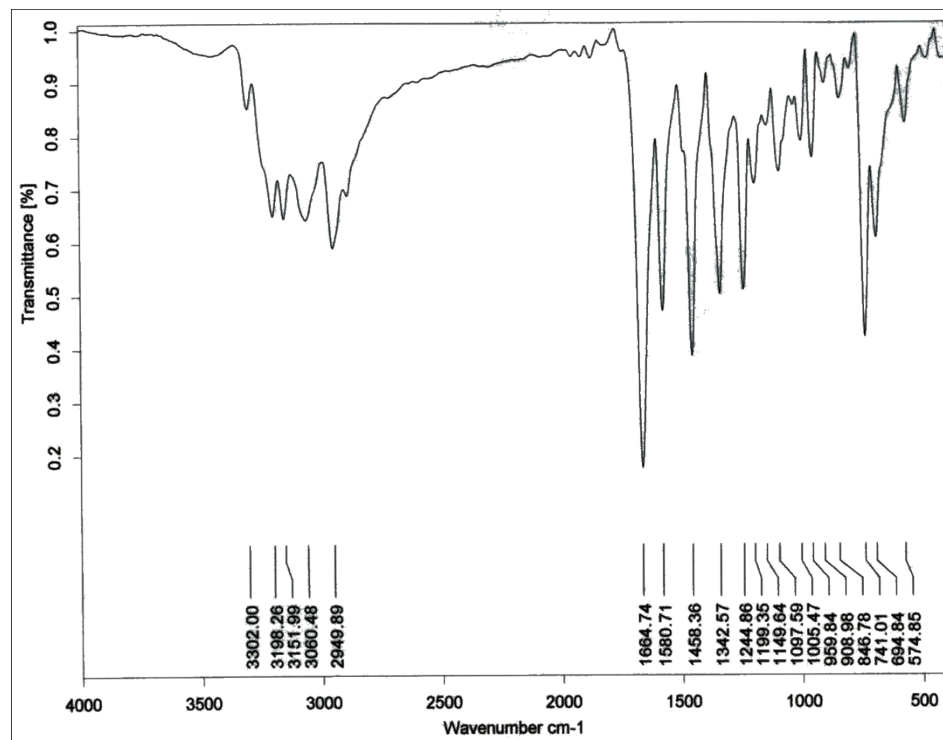

Figure S76. IR (KBr discs) spectrum of *N*-phenethylbenzo[*d*]oxazol-2-amine

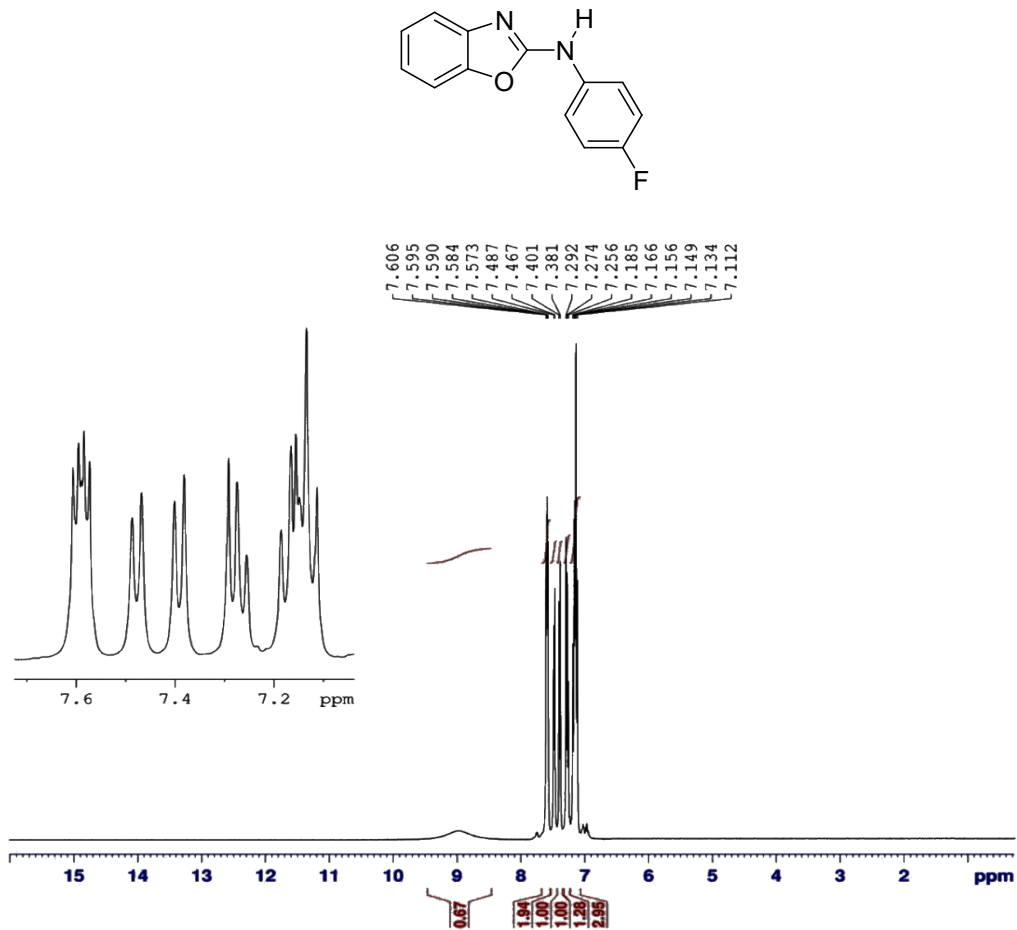

Figure S77. <sup>1</sup>H-NMR spectrum of *N*-(4-fluorophenyl)benzo[*d*]oxazol-2-amine in CDCl<sub>3</sub>

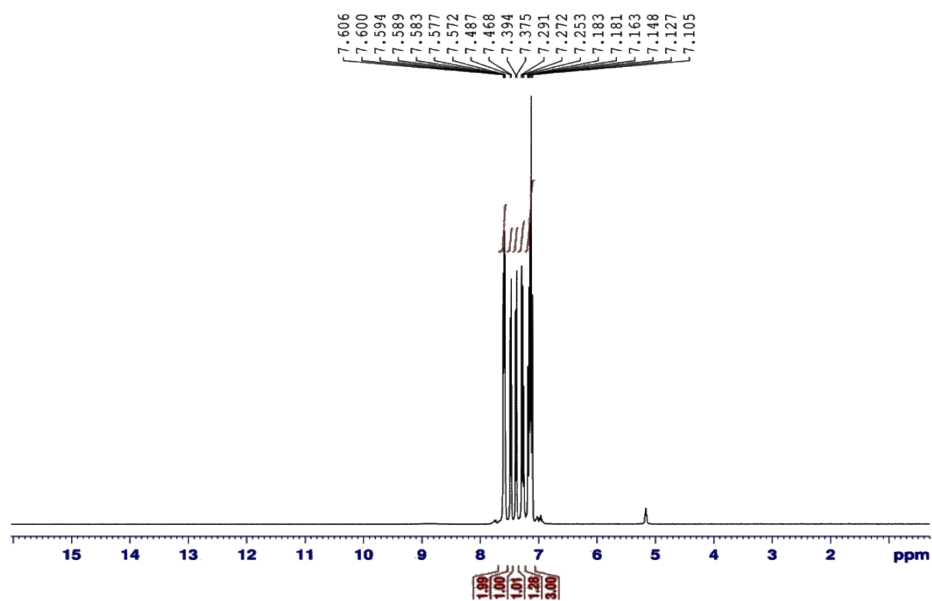

Figure S78. <sup>1</sup>H-NMR spectrum of *N*-(4-fluorophenyl)benzo[*d*]oxazol-2-amine in CDCl<sub>3</sub> (D<sub>2</sub>O as exchanged solvent is used)

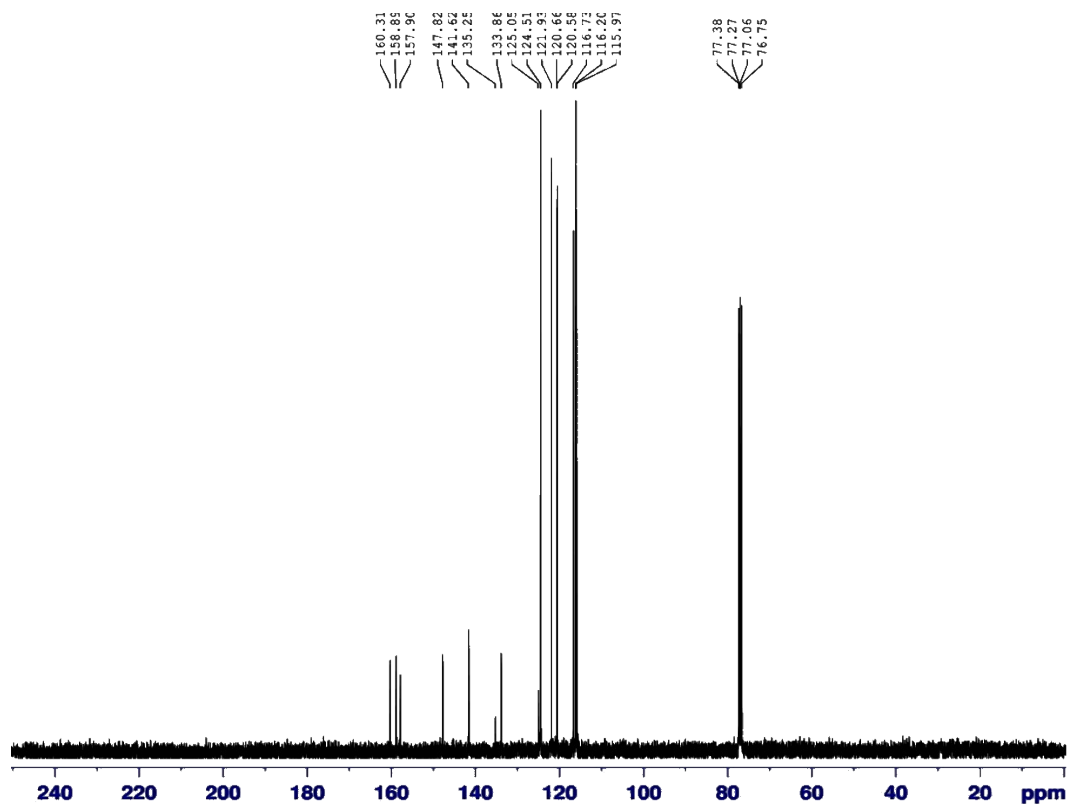

Figure S79.  $^{13}\text{C}$ -NMR spectrum of *N*-(4-fluorophenyl)benzo[d]oxazol-2-amine in  $\text{CDCl}_3$

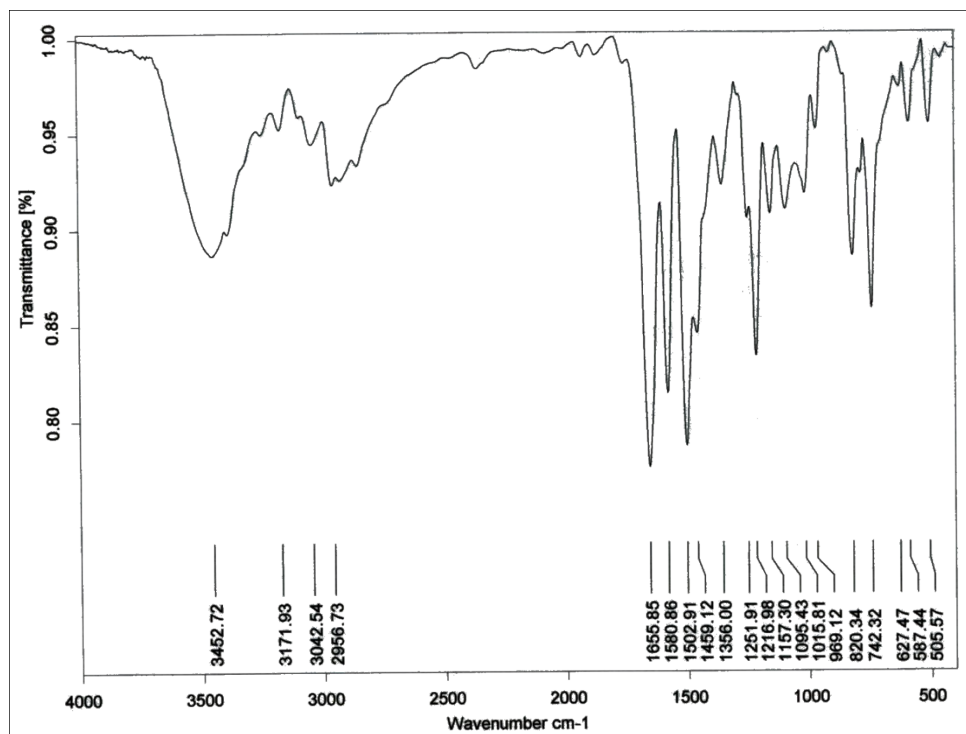

Figure S80. IR (KBr discs) spectrum of *N*-(4-fluorophenyl)benzo[d]oxazol-2-amine
